# Supplementary material for: Genetically Determined Blood Pressure, Antihypertensive Medications, and Risk of Alzheimer’s Disease: A Mendelian Randomization Study
Source: Research Square preprint supplement (doi:10.21203/rs.3.rs-125105/v1), 2020-12-11
Supplement: Supplementary file 1 [file 2a246b49c0cb20a626b9e50d.docx]

**Content:**

**Additional file 1** Demographic characteristics of included GWASs used in the present MR analysis......................................................................................................................................................2

**Additional file 2** Drug classes, substances and targets with their DrugBank ID............................................................................................................................................................3-7

**Additional file 3** SNP that fulfilled our selection criteria to be used as proxies for the effects for AHM classes...................................................................................................................................................8-13

**Additional file 4** Genome-wide significant and independent SNPs that were used as instruments for SBP.....................................................................................................................................................14-30

**Additional file 5** Genome-wide significant and independent SNPs that were used as instruments for DBP….................................................................................................................................................31-46

**Additional file 6** Genome-wide significant and independent SNPs that were used as instruments for PP........................................................................................................................................................47-60

**Additional file 7** Leave-one-out plots....................................................................................................................................................61-63

**Additional file 1 Demographic characteristics of included GWASs used in the present MR analysis**

| **GWAS type** | **Sample size (case/control)** | **Mean age of cases** | **Mean age of controls** | **Phenotype ascertainment** |
| --- | --- | --- | --- | --- |
| **AD GWAS** | 21982/41994 |  |  |  |
| ADGC | 14428/14562 | 71.1 | 76.2 | Autopsy-confirmed or clinically-confirmed |
| CHARGE | 2137/13474 | 82.6 | 76.7 | Autopsy-confirmed or clinically-confirmed |
| EADI | 2240/6631 | 75.4 | 78.9 | Autopsy-confirmed or clinically-confirmed |
| GERAD/PERADES | 3177/7277 | 73.0 | 51.0 | Autopsy-confirmed or clinically-confirmed |
| **BP GWAS** | 757601 |  | |  |
| UKB | 458577 | 56.8 | | Digital and manual blood pressure monitor |
| ICBP | 299024 | 62.1 | | Standardized sphygmomanometer |

Abbreviations: GWAS, Genome wide association study; MR, Mendelian randomization; ADGC, Alzheimer Disease Genetics Consortium; CHARGE, Cohorts for Heart and Aging Research in Genomic Epidemiology Consortium; EADI, Genetic and Environmental Risk in AD/Defining Genetic; GERAD/PERADES, Polygenic and Environmental Risk for Alzheimer's Disease Consortium; UKB, UK Biobank; ICBP, International Consortium of Blood Pressure Genome Wide Association Studies.

**Additional file 2 Drug classes, substances and targets with their DrugBank ID**

| **drug** | **substance** | **drugbank_id** | **gene** |
| --- | --- | --- | --- |
| ARB | azilsartan | DB08822 | AGTR1 |
| ARB | candesartan | DB13919 | AGTR1 |
| ARB | eprosartan | DB00876 | AGTR1 |
| ARB | irbesartan | DB01029 | AGTR1 |
| ARB | losartan | DB00678 | AGTR1 |
| ARB | olmesartan | DB00275 | AGTR1 |
| ARB | telmisartan | DB00966 | PPARG;AGTR1 |
| ARB | Candesartan cilexetil | DB00796 | AGTR1 |
| ARB | Forasartan | DB01342 | AGTR1 |
| ARB | Saprisartan | DB01347 | AGTR1 |
| ARB | Tasosartan | DB01349 | AGTR1;AGTR2 |
| ARB | Fimasartan | DB09279 | AGTR1 |
| ARB | valsartan | DB00177 | AGTR1 |
| ACEI | captopril | DB01197 | ACE |
| ACEI | cilazapril | DB01340 | ACE |
| ACEI | enalapril | DB00584 | ACE |
| ACEI | fosinopril | DB00492 | ACE |
| ACEI | lisinopril | DB00722 | ACE |
| ACEI | moexipril | DB00691 | ACE;ACE2 |
| ACEI | perindopril | DB00790 | ACE |
| ACEI | quinapril | DB00881 | ACE |
| ACEI | ramipril | DB00178 | ACE |
| ACEI | Rescinnamine | DB01180 | ACE |
| ACEI | Benazepril | [DB00542](https://www.drugbank.ca/drugs/DB00542) | ACE |
| ACEI | Enalaprilat | [DB09477](https://www.drugbank.ca/drugs/DB09477) | ACE;BDKRB1 |
| ACEI | Zofenopril | DB13166 | ACE |
| ACEI | Spirapril | DB01348 | ACE |
| ACEI | trandolapril | DB00519 | ACE |
| ACEI | imidapril | DB11783 | ACE |
| BB | atenolol | DB00335 | ADRB1 |
| BB | betaxolol | DB00195 | ADRB1 |
| BB | bisoprolol | DB00612 | ADRB1 |
| BB | Esmolol | DB00187 | ADRB1 |
| BB | Alprenolol | DB00866 | ADRB1;ADRB2;HTR1A;ADRB3 |
| BB | metoprolol | DB00264 | ADRB1 |
| BB | propranolol | DB00571 | ADRB1 |
| BB | timolol | DB00373 | ADRB1;ADRB2 |
| BB | carvedilol | DB01136 | ADRB1;ADRA1A |
| BB | labetalol | DB00598 | ADRA1A;ADRA1D;ADRB2;ADRA1B;ADRB1 |
| BB | Levobunolol | DB01210 | ADRB2;ADRB1 |
| BB | nadolol | DB01203 | ADRB1 |
| BB | oxprenolol | DB01580 | ADRB1 |
| BB | practolol | DB01297 | ADRB1 |
| BB | Metipranolol | DB01214 | ADRB2;ADRB1 |
| BB | Bevantolol | DB01295 | ADRB1;ADRB2;ADRA1A |
| BB | celiprolol | DB04846 | ADRB2;ADRB1 |
| BB | nebivolol | DB04861 | ADRB1 |
| BB | sotalol | DB00489 | KCNH2;ADRB2;ADRB1 |
| BB | Penbutolol | DB01359 | ADRB1;ADRB2;HTR1A;HTR1B |
| BB | Bupranolol | DB08808 | ADRB1;ADRB2;ADRB3 |
| BB | Levobetaxolol | DB09351 | ADRB1 |
| BB | Arotinolol | DB09204 | CYP2D6 |
| BB | carteolol | DB00521 | ADRB1;ADRB2 |
| BB | Sotalol | DB00489 | KCNH2;ADRB1;ADRB2 |
| BB | Arotinolol | DB09204 | ADRB1;ADRB2; |
| BB | Timolol | DB00373 | ADRB1;ADRB2;E |
| BB | Labetalol | DB00598 | ADRB1;ADRB2 |
| BB | Alprenolol | DB00866 | ADRB1;ADRB2;HTR1A;ADRB3 |
| BB | Metipranolol | DB01214 | ADRB2;ADRB1 |
| BB | Penbutolol | DB01359 | ADRB1;ADRB2;HTR1A;HTR1B |
| BB | Levobunolol | DB01210 | ADRB2;ADRB1 |
| BB | acebutolol | DB01193 | ADRB1 |
| BB | carteolol | DB00521 | ADRB1;ADRB2 |
| BB | isoprenaline | DB01064 | ADRB3;ADRB1;ADRB2 |
| BB | pindolol | DB00960 | ADRB1;ADRB2 |
| BB | timolol | DB00373 | ADRB1;ADRB2 |
| CCB | amlodipine | DB00381 | CACNA1D;CACNA1C;CACNB2;CACNA2D1;CACNA1S |
| CCB | isradipine | DB00270 | CACNA1D;CACNA2D2;CACNA2D1;CACNA1S;CACNB2;CACNA1C;CACNA1H |
| CCB | lacidipine | DB09236 | CACNB3;CACNB4;CACNA1S;CACNB2;CACNA1F;CACNA1D;CACNB1;CACNA1C |
| CCB | lercanidipine | DB00528 | CACNG1 |
| CCB | nimodipine | DB00393 | CACNA1S;CACNB2;CACNB4;CACNA1C;CACNA1D;CACNB1;CACNB3;CACNA1F |
| CCB | Benidipine | DB09231 |  |
| CCB | Cilnidipine | DB09232 |  |
| CCB | verapamil | DB00661 | CACNB4;CACNA1S;CACNB1;CACNB3;CACNA1C;CACNB2;CACNA1F;CACNA1D |
| CCB | Aranidipine | DB09229 | CACNA1C;CACNA1D;CACNA1F;CACNA1S |
| CCB | nifedipine | DB01115 | CACNA2D1;CACNA1S;CACNA1C;CACNB2;CACNA1D |
| CCB | nisoldipine | DB00401 | CACNA1S;CACNA1C;CACNB2;CACNA1D;CACNA2D1 |
| CCB | Manidipine | DB09238 |  |
| CCB | Nilvadipine | DB06712 | CACNA1C;CACNA2D1;CACNB2;CACNA1D;CACNA1S;CACNA2D3 |
| CCB | Barnidipine | DB09227 | CACNA1C |
| CCB | Levamlodipine | DB09237 | CACNA1C;CACNA1D; |
| CCB | Diltiazem | DB00343 | CACNG1;CACNA1C |
| CCB | Felodipine | DB01023 | CACNA1C;CACNA2D1;CACNB2;CACNA1D;CACNA1S;CACNA1H;CACNA2D2;PDE1B;PDE1A;NR3C2 |
| CCB | Nitrendipine | DB01054 | CACNA1C;CACNA2D1;CACNB2;CACNA1D;CACNA2D2;CACNA1H;CACNA1S |
| CCB | Nicardipine | DB00622 | CACNA1C;CACNB2;CACNA2D1;CACNA1D;PDE1A;PDE1B;ADRA1A;ADRA1B;ADRA1D;CHRM1;CHRM2;CHRM3;CHRM4;CHRM5 |
| CCB | mibefradil | DB01388 | CACNA1I;CACNB3;CACNB1;CACNA1G;CACNB2;CACNA1C;CACNB4;CACNA1H;CACNA1F;CACNA1D;CACNA1S |
| CCB | perhexiline | DB01074 | CPT2;CPT1A |
| CCB | prenylamine | DB04825 | MYLK2 |
| Thiazides | bendroflumethiazide | DB00436 | SLC12A3;KCNMA1 |
| Thiazides | chlorothiazide | DB00880 | CA1;SLC12A3;CA2 |
| Thiazides | hydrochlorothiazide | DB00999 | SLC12A3;KCNMA1 |
| Thiazides | hydroflumethiazide | DB00774 | SLC12A1 |
| Thiazides | indapamide | DB00808 | SLC12A3 |
| Thiazides | metolazone | DB00524 | SLC12A3 |
| Thiazides | Quinethazone | DB01325 | CA1;CA2;SLC12A1;SLC12A2;SLC12A3 |
| Thiazides | Trichlormethiazide | DB01021 | SLC12A3;ATP1A1;CA1;CA2;CA4 |
| Thiazides | Benzthiazide | DB00562 | SLC12A3;CA1;CA2;CA4;CA9;CA12 |
| Thiazides | chlortalidone | DB00310 | SLC12A1 |
| Thiazides | polythiazide | DB01324 | SLC12A3 |
| Thiazides | Triamterene | DB00384 | SCNN1G;SCNN1A;SCNN1B;SCNN1D |
| Thiazides | Cyclothiazide | DB00606 | FXYD2;CA1;CA2;SFRP4 |
| Thiazides | cyclopenthiazide | DB13532 |  |
| Thiazides | methyclothiazide | DB00232 | SLC12A1 |
| Thiazides | Theobromine | DB01412 | ADORA1;ADORA2A;PDE4B |
| Thiazides | Potassium | DB14500 | ATP1A1 |
| Thiazides | meprobamate | DB00371 | GABRA3;GABRA2;GABRA1;GABRB3;GABRB1;GABRA4;GABRB2;GABRQ;GABRA5;GABRG1;GABRD;GABRG3;GABRG2;GABRA6;GABRP;GABRE |
| Thiazides | Mebutizide | DB13430 |  |
| Thiazides | xipamide |  |  |
| Thiazides | mefruside |  |  |

The latest release of DrugBank (version 5.1.7, released 2020-07-02) contains 13,596 drug entries including 2,640 approved small molecule drugs, 1,389 approved biologics (proteins, peptides, vaccines, and allergenics), 131 nutraceuticals and over 6,377 experimental (discovery-phase) drugs. Additionally, 5,225 non-redundant protein (i.e. drug target/enzyme/transporter/carrier) sequences are linked to these drug entries. Each entry contains more than 200 data fields with half of the information being devoted to drug/chemical data and the other half devoted to drug target or protein data.

**Additional file 3 SNP that fulfilled our selection criteria to be used as proxies for the effects for antihypertensive drug classes**

| **Drug** |  |  |  |  |  |  |  |  |  |  |  |  |
| --- | --- | --- | --- | --- | --- | --- | --- | --- | --- | --- | --- | --- |
| **ARB** | SNP | effect_allele | other_allele | beta.exposure | beta.outcome | eaf | se.outcome | pval.outcome | gene | se.exposure | samplesize | pval.exposure |
|  | rs1797912 | A | C | 1.74E-01 | -1.07E-02 | 3.62E-01 | 1.49E-02 | 4.74E-01 | PPARG | 3.17E-02 | 757601 | 3.79E-08 |
| **CCB** | rs10741039 | A | C | 1.72E-01 | -9.60E-03 | 4.76E-01 | 1.44E-02 | 5.05E-01 | CACNB2 | 3.01E-02 | 757601 | 1.22E-08 |
|  | rs10764319 | T | C | 2.69E-01 | 1.90E-03 | 6.96E-01 | 1.56E-02 | 9.04E-01 | CACNB2 | 3.29E-02 | 757601 | 2.54E-16 |
|  | rs10828399 | A | G | -1.95E-01 | -4.00E-04 | 4.78E-01 | 1.42E-02 | 9.79E-01 | CACNB2 | 3.02E-02 | 757601 | 1.10E-10 |
|  | rs10828542 | A | G | 1.82E-01 | -1.76E-02 | 3.86E-01 | 1.49E-02 | 2.37E-01 | CACNB2 | 3.11E-02 | 757601 | 5.18E-09 |
|  | rs10828662 | T | C | -2.88E-01 | 2.30E-03 | 4.41E-01 | 1.44E-02 | 8.71E-01 | CACNB2 | 3.04E-02 | 757601 | 2.54E-21 |
|  | rs10828749 | A | G | -3.66E-01 | 2.24E-02 | 5.88E-01 | 1.45E-02 | 1.24E-01 | CACNB2 | 3.09E-02 | 757601 | 2.27E-32 |
|  | rs11012811 | T | G | 3.10E-01 | -2.19E-02 | 6.90E-01 | 1.54E-02 | 1.53E-01 | CACNB2 | 3.26E-02 | 757601 | 2.31E-21 |
|  | rs11013938 | C | G | -3.27E-01 | 2.79E-02 | 7.45E-01 | 1.66E-02 | 9.22E-02 | CACNB2 | 3.50E-02 | 757601 | 1.17E-20 |
|  | rs11014170 | A | G | -6.70E-01 | 3.19E-02 | 9.79E-01 | 5.66E-02 | 5.73E-01 | CACNB2 | 1.15E-01 | 757601 | 5.61E-09 |
|  | rs112133583 | T | C | -5.55E-01 | -7.05E-02 | 9.70E-01 | 5.47E-02 | 1.97E-01 | CACNB2 | 9.73E-02 | 757601 | 1.18E-08 |
|  | rs113210396 | T | G | -4.34E-01 | 5.64E-02 | 9.55E-01 | 3.81E-02 | 1.39E-01 | CACNA1D | 7.70E-02 | 757601 | 1.76E-08 |
|  | rs114987861 | A | G | 5.29E-01 | -5.66E-02 | 9.72E-01 | 4.83E-02 | 2.41E-01 | CACNA1D | 9.58E-02 | 7.58E+05 | 3.36E-08 |
|  | rs116936375 | A | G | -5.74E-01 | 1.60E-03 | 9.60E-01 | 3.92E-02 | 9.68E-01 | CACNB2 | 8.10E-02 | 757601 | 1.40E-12 |
|  | rs11709630 | T | G | 1.93E-01 | 1.70E-03 | 3.63E-01 | 1.53E-02 | 9.10E-01 | CACNA1D | 3.20E-02 | 757601 | 1.61E-09 |
|  | rs12258967 | C | G | 6.33E-01 | -1.68E-02 | 2.95E-01 | 1.64E-02 | 3.05E-01 | CACNB2 | 3.37E-02 | 757601 | 1.08E-78 |
|  | rs12416030 | T | C | -2.09E-01 | 1.20E-02 | 2.03E-01 | 1.81E-02 | 5.07E-01 | CACNB2 | 3.81E-02 | 757601 | 4.32E-08 |
|  | rs12416052 | T | C | 1.99E-01 | -3.10E-02 | 4.05E-01 | 1.46E-02 | 3.38E-02 | CACNB2 | 3.11E-02 | 757601 | 1.59E-10 |
|  | rs12571593 | A | G | -4.00E-01 | 1.80E-02 | 9.27E-02 | 2.47E-02 | 4.67E-01 | CACNB2 | 5.21E-02 | 757601 | 1.71E-14 |
|  | rs1325990 | A | G | -3.87E-01 | 1.22E-02 | 5.30E-01 | 1.42E-02 | 3.91E-01 | CACNB2 | 3.02E-02 | 757601 | 1.09E-37 |
|  | rs1547950 | T | C | -2.15E-01 | 2.22E-02 | 4.62E-01 | 1.48E-02 | 1.32E-01 | CACNA1D | 3.07E-02 | 757601 | 2.33E-12 |
|  | rs1757213 | A | G | 3.08E-01 | -5.90E-03 | 8.88E-01 | 2.68E-02 | 8.26E-01 | CACNB2 | 5.07E-02 | 757601 | 1.15E-09 |
|  | rs17604757 | A | G | -5.02E-01 | 2.60E-03 | 6.75E-02 | 2.86E-02 | 9.27E-01 | CACNB2 | 6.06E-02 | 757601 | 1.12E-16 |
|  | rs17610275 | T | G | 3.87E-01 | -5.69E-02 | 7.34E-02 | 2.83E-02 | 4.42E-02 | CACNB2 | 6.13E-02 | 757601 | 2.87E-10 |
|  | rs17662793 | A | G | 2.36E-01 | -2.48E-02 | 2.88E-01 | 1.60E-02 | 1.21E-01 | CACNB2 | 3.38E-02 | 757601 | 2.65E-12 |
|  | rs1779209 | T | C | 2.74E-01 | -5.00E-03 | 7.12E-01 | 1.57E-02 | 7.53E-01 | CACNB2 | 3.36E-02 | 757601 | 4.23E-16 |
|  | rs1888693 | A | G | 3.86E-01 | -7.50E-03 | 6.55E-01 | 1.50E-02 | 6.16E-01 | CACNB2 | 3.17E-02 | 757601 | 4.69E-34 |
|  | rs1998822 | A | G | -1.96E-01 | 1.46E-02 | 2.77E-01 | 1.61E-02 | 3.65E-01 | CACNB2 | 3.43E-02 | 757601 | 1.15E-08 |
|  | rs2239046 | A | G | 2.08E-01 | 4.10E-03 | 3.18E-01 | 1.55E-02 | 7.90E-01 | CACNA1C | 3.22E-02 | 757601 | 9.58E-11 |
|  | rs2482100 | A | G | 3.13E-01 | -2.11E-02 | 8.43E-01 | 1.96E-02 | 2.81E-01 | CACNB2 | 4.17E-02 | 757601 | 5.65E-14 |
|  | rs2633731 | T | C | -1.96E-01 | -2.00E-02 | 6.04E-01 | 1.46E-02 | 1.71E-01 | CACNA1D | 3.09E-02 | 757601 | 2.21E-10 |
|  | rs312487 | T | C | 2.19E-01 | -7.00E-03 | 5.22E-01 | 1.45E-02 | 6.29E-01 | CACNA1D | 3.07E-02 | 757601 | 9.65E-13 |
|  | rs34606998 | T | C | 2.58E-01 | -1.57E-02 | 7.61E-01 | 1.71E-02 | 3.59E-01 | CACNB2 | 3.57E-02 | 757601 | 4.34E-13 |
|  | rs35241357 | A | G | -3.08E-01 | 1.89E-02 | 3.52E-01 | 1.50E-02 | 2.07E-01 | CACNB2 | 3.17E-02 | 757601 | 2.64E-22 |
|  | rs3821843 | A | G | 3.37E-01 | -1.69E-02 | 3.19E-01 | 1.61E-02 | 2.93E-01 | CACNA1D | 3.35E-02 | 757601 | 6.56E-24 |
|  | rs4748444 | T | C | 1.94E-01 | -2.37E-02 | 3.36E-01 | 1.56E-02 | 1.30E-01 | CACNB2 | 3.27E-02 | 757601 | 3.13E-09 |
|  | rs4748472 | T | C | 3.16E-01 | -2.88E-02 | 3.44E-01 | 1.49E-02 | 5.38E-02 | CACNB2 | 3.19E-02 | 757601 | 4.04E-23 |
|  | rs4748476 | T | C | 2.17E-01 | -4.70E-03 | 2.23E-01 | 1.72E-02 | 7.84E-01 | CACNB2 | 3.65E-02 | 757601 | 2.89E-09 |
|  | rs61278674 | A | G | -3.30E-01 | -7.70E-03 | 9.38E-02 | 2.83E-02 | 7.84E-01 | CACNB2 | 5.40E-02 | 757601 | 1.03E-09 |
|  | rs67214975 | A | C | -4.14E-01 | 1.56E-02 | 5.44E-01 | 1.48E-02 | 2.94E-01 | CACNB2 | 3.07E-02 | 757601 | 1.42E-41 |
|  | rs7076247 | T | C | 2.56E-01 | -1.80E-02 | 6.11E-01 | 1.45E-02 | 2.16E-01 | CACNB2 | 3.09E-02 | 757601 | 1.33E-16 |
|  | rs714277 | T | C | 1.99E-01 | 4.90E-03 | 7.17E-01 | 1.60E-02 | 7.59E-01 | CACNA1C | 3.33E-02 | 757601 | 2.38E-09 |
|  | rs718448 | T | C | 2.06E-01 | -2.43E-02 | 7.43E-01 | 1.63E-02 | 1.37E-01 | PDE1A | 3.46E-02 | 757601 | 2.43E-09 |
|  | rs72786098 | A | G | -5.03E-01 | 3.40E-03 | 9.68E-01 | 4.52E-02 | 9.41E-01 | CACNB2 | 8.83E-02 | 757601 | 1.18E-08 |
|  | rs7340705 | T | C | -2.43E-01 | 4.20E-03 | 3.27E-01 | 1.51E-02 | 7.79E-01 | CACNA1D | 3.22E-02 | 757601 | 4.87E-14 |
|  | rs7923191 | A | G | -3.69E-01 | 1.88E-02 | 2.08E-01 | 1.78E-02 | 2.92E-01 | CACNB2 | 3.76E-02 | 757601 | 1.10E-22 |
|  | rs9311502 | T | C | -2.46E-01 | 4.00E-03 | 2.39E-01 | 1.68E-02 | 8.10E-01 | CACNA1D | 3.55E-02 | 757601 | 3.87E-12 |
|  | rs982003 | T | C | -2.41E-01 | -6.70E-03 | 2.43E-01 | 1.70E-02 | 6.91E-01 | CACNB2 | 3.51E-02 | 757601 | 6.21E-12 |
| **Thiazides** | rs1262894 | A | C | 3.47E-01 | 4.03E-02 | 7.64E-02 | 3.27E-02 | 2.18E-01 | SCNN1D | 6.10E-02 | 757601 | 1.29E-08 |
|  | rs3101725 | T | C | -1.98E-01 | 1.32E-02 | 7.58E-01 | 1.68E-02 | 4.32E-01 | SLC12A2 | 3.56E-02 | 757601 | 2.75E-08 |
|  | rs33996239 | T | C | -3.66E-01 | -3.57E-02 | 9.40E-01 | 3.13E-02 | 2.54E-01 | ADORA1 | 6.62E-02 | 757601 | 3.39E-08 |
|  | rs4836365 | A | C | 3.48E-01 | -1.43E-02 | 8.87E-01 | 2.31E-02 | 5.37E-01 | SLC12A2 | 4.78E-02 | 757601 | 3.15E-13 |
|  | rs59484271 | T | C | 2.41E-01 | -1.40E-03 | 7.87E-01 | 1.77E-02 | 9.35E-01 | SLC12A2 | 3.73E-02 | 757601 | 1.09E-10 |
| **BB** | rs12540183 | T | C | 1.95E-01 | -1.34E-02 | 6.16E-01 | 1.47E-02 | 3.63E-01 | KCNH2 | 3.12E-02 | 757601 | 4.17E-10 |

| **AHMs** |  |  |  |  |  |  |  |  |  |  |  |  |  |
| --- | --- | --- | --- | --- | --- | --- | --- | --- | --- | --- | --- | --- | --- |
| SNP | effect_allele | other_allele | beta.exposure | beta.outcome | eaf | a | se.outcome | pval.outcome | se.exposure | samplesize. | pval.exposure | F | R2 |
| rs10741039 | A | C | 0.1716 | -0.0096 | 0.4761 | 0.5239 | 0.0144 | 0.5047 | 0.0301 | 757601 | 1.22E-08 | 32.45 | 4.28E-05 |
| rs10764319 | T | C | 0.2693 | 0.0019 | 0.6956 | 0.3044 | 0.0156 | 0.904 | 0.0329 | 757601 | 2.54E-16 | 67.13 | 8.86E-05 |
| rs10828399 | A | G | -0.1947 | -4.00E-04 | 0.4782 | 0.5218 | 0.0142 | 0.9793 | 0.0302 | 757601 | 1.10E-10 | 41.64 | 5.50E-05 |
| rs10828542 | A | G | 0.1817 | -0.0176 | 0.3863 | 0.6137 | 0.0149 | 0.2371 | 0.0311 | 757601 | 5.18E-09 | 34.12 | 4.50E-05 |
| rs10828662 | T | C | -0.2879 | 0.0023 | 0.4414 | 0.5586 | 0.0144 | 0.8705 | 0.0304 | 757601 | 2.54E-21 | 89.87 | 1.19E-04 |
| rs10828749 | A | G | -0.3658 | 0.0224 | 0.588 | 0.412 | 0.0145 | 0.1241 | 0.0309 | 757601 | 2.27E-32 | 140.32 | 1.85E-04 |
| rs11012811 | T | G | 0.3095 | -0.0219 | 0.69 | 0.31 | 0.0154 | 0.1531 | 0.0326 | 757601 | 2.31E-21 | 90.06 | 1.19E-04 |
| rs11014170 | A | G | -0.6701 | 0.0319 | 0.9794 | 0.0206 | 0.0566 | 0.5727 | 0.115 | 757601 | 5.61E-09 | 33.97 | 4.48E-05 |
| rs112133583 | T | C | -0.5546 | -0.0705 | 0.9701 | 0.0299 | 0.0547 | 0.1969 | 0.0973 | 757601 | 1.18E-08 | 32.52 | 4.29E-05 |
| rs113210396 | T | G | -0.4338 | 0.0564 | 0.9549 | 0.0451 | 0.0381 | 0.1392 | 0.077 | 757601 | 1.76E-08 | 31.74 | 4.19E-05 |
| rs114987861 | A | G | 0.5289 | -0.0566 | 0.9716 | 0.0284 | 0.0483 | 0.2408 | 0.0958 | 757601 | 3.36E-08 | 30.49 | 4.02E-05 |
| rs116936375 | A | G | -0.5739 | 0.0016 | 0.9595 | 0.0405 | 0.0392 | 0.968 | 0.081 | 757601 | 1.40E-12 | 50.18 | 6.62E-05 |
| rs11709630 | T | G | 0.1931 | 0.0017 | 0.3627 | 0.6373 | 0.0153 | 0.9098 | 0.032 | 757601 | 1.61E-09 | 36.40 | 4.80E-05 |
| rs12416030 | T | C | -0.2088 | 0.012 | 0.2031 | 0.7969 | 0.0181 | 0.5065 | 0.0381 | 757601 | 4.32E-08 | 30.00 | 3.96E-05 |
| rs12416052 | T | C | 0.1987 | -0.031 | 0.4053 | 0.5947 | 0.0146 | 0.03375 | 0.0311 | 757601 | 1.59E-10 | 40.91 | 5.40E-05 |
| rs12540183 | T | C | 0.1951 | -0.0134 | 0.6157 | 0.3843 | 0.0147 | 0.363 | 0.0312 | 757601 | 4.17E-10 | 39.03 | 5.15E-05 |
| rs12571593 | A | G | -0.3996 | 0.018 | 0.0927 | 0.9073 | 0.0247 | 0.4674 | 0.0521 | 757601 | 1.71E-14 | 58.84 | 7.77E-05 |
| rs1262894 | A | C | 0.3469 | 0.0403 | 0.0764 | 0.9236 | 0.0327 | 0.2178 | 0.061 | 757601 | 1.29E-08 | 32.35 | 4.27E-05 |
| rs1325990 | A | G | -0.3873 | 0.0122 | 0.5297 | 0.4703 | 0.0142 | 0.3912 | 0.0302 | 757601 | 1.09E-37 | 164.65 | 2.17E-04 |
| rs1547950 | T | C | -0.2151 | 0.0222 | 0.4623 | 0.5377 | 0.0148 | 0.132 | 0.0307 | 757601 | 2.33E-12 | 49.18 | 6.49E-05 |
| rs1757213 | A | G | 0.3084 | -0.0059 | 0.888 | 0.112 | 0.0268 | 0.8264 | 0.0507 | 757601 | 1.15E-09 | 37.05 | 4.89E-05 |
| rs17604757 | A | G | -0.5022 | 0.0026 | 0.0675 | 0.9325 | 0.0286 | 0.9268 | 0.0606 | 757601 | 1.12E-16 | 68.75 | 9.07E-05 |
| rs17610275 | T | G | 0.3868 | -0.0569 | 0.0734 | 0.9266 | 0.0283 | 0.0442 | 0.0613 | 757601 | 2.87E-10 | 39.76 | 5.25E-05 |
| rs17662793 | A | G | 0.2363 | -0.0248 | 0.2876 | 0.7124 | 0.016 | 0.1211 | 0.0338 | 757601 | 2.65E-12 | 48.93 | 6.46E-05 |
| rs1779209 | T | C | 0.2736 | -0.005 | 0.7124 | 0.2876 | 0.0157 | 0.7528 | 0.0336 | 757601 | 4.23E-16 | 66.13 | 8.73E-05 |
| rs1797912 | A | C | 0.1742 | -0.0107 | 0.3618 | 0.6382 | 0.0149 | 0.4736 | 0.0317 | 757601 | 3.79E-08 | 30.25 | 3.99E-05 |
| rs1888693 | A | G | 0.3858 | -0.0075 | 0.6551 | 0.3449 | 0.015 | 0.6164 | 0.0317 | 757601 | 4.69E-34 | 148.02 | 1.95E-04 |
| rs1998822 | A | G | -0.1958 | 0.0146 | 0.2766 | 0.7234 | 0.0161 | 0.365 | 0.0343 | 757601 | 1.15E-08 | 32.57 | 4.30E-05 |
| rs2239046 | A | G | 0.2082 | 0.0041 | 0.3183 | 0.6817 | 0.0155 | 0.7902 | 0.0322 | 757601 | 9.58E-11 | 41.91 | 5.53E-05 |
| rs2482100 | A | G | 0.3134 | -0.0211 | 0.8428 | 0.1572 | 0.0196 | 0.2811 | 0.0417 | 757601 | 5.65E-14 | 56.49 | 7.46E-05 |
| rs2633731 | T | C | -0.1963 | -0.02 | 0.6038 | 0.3962 | 0.0146 | 0.1709 | 0.0309 | 757601 | 2.21E-10 | 40.27 | 5.32E-05 |
| rs3101725 | T | C | -0.1979 | 0.0132 | 0.7583 | 0.2417 | 0.0168 | 0.4322 | 0.0356 | 757601 | 2.75E-08 | 30.88 | 4.08E-05 |
| rs312487 | T | C | 0.2194 | -0.007 | 0.5217 | 0.4783 | 0.0145 | 0.6285 | 0.0307 | 757601 | 9.65E-13 | 50.91 | 6.72E-05 |
| rs33996239 | T | C | -0.3655 | -0.0357 | 0.9399 | 0.0601 | 0.0313 | 0.254 | 0.0662 | 757601 | 3.39E-08 | 30.47 | 4.02E-05 |
| rs34606998 | T | C | 0.2583 | -0.0157 | 0.7606 | 0.2394 | 0.0171 | 0.3585 | 0.0357 | 757601 | 4.34E-13 | 52.48 | 6.93E-05 |
| rs35241357 | A | G | -0.3077 | 0.0189 | 0.3522 | 0.6478 | 0.015 | 0.2069 | 0.0317 | 757601 | 2.64E-22 | 94.35 | 1.25E-04 |
| rs3821843 | A | G | 0.3373 | -0.0169 | 0.3192 | 0.6808 | 0.0161 | 0.2931 | 0.0335 | 757601 | 6.56E-24 | 101.67 | 1.34E-04 |
| rs4748444 | T | C | 0.1939 | -0.0237 | 0.3363 | 0.6637 | 0.0156 | 0.1296 | 0.0327 | 757601 | 3.13E-09 | 35.10 | 4.63E-05 |
| rs4748472 | T | C | 0.3161 | -0.0288 | 0.3442 | 0.6558 | 0.0149 | 0.0538 | 0.0319 | 757601 | 4.04E-23 | 98.07 | 1.29E-04 |
| rs4748476 | T | C | 0.2166 | -0.0047 | 0.2229 | 0.7771 | 0.0172 | 0.7842 | 0.0365 | 757601 | 2.89E-09 | 35.26 | 4.65E-05 |
| rs4836365 | A | C | 0.3483 | -0.0143 | 0.8871 | 0.1129 | 0.0231 | 0.5369 | 0.0478 | 757601 | 3.15E-13 | 53.11 | 7.01E-05 |
| rs59484271 | T | C | 0.241 | -0.0014 | 0.787 | 0.213 | 0.0177 | 0.9354 | 0.0373 | 757601 | 1.09E-10 | 41.65 | 5.50E-05 |
| rs61278674 | A | G | -0.3298 | -0.0077 | 0.0938 | 0.9062 | 0.0283 | 0.7841 | 0.054 | 757601 | 1.03E-09 | 37.27 | 4.92E-05 |
| rs67214975 | A | C | -0.4144 | 0.0156 | 0.5437 | 0.4563 | 0.0148 | 0.2944 | 0.0307 | 757601 | 1.42E-41 | 182.44 | 2.41E-04 |
| rs7076247 | T | C | 0.2557 | -0.018 | 0.6114 | 0.3886 | 0.0145 | 0.2155 | 0.0309 | 757601 | 1.33E-16 | 68.41 | 9.03E-05 |
| rs714277 | T | C | 0.1986 | 0.0049 | 0.7166 | 0.2834 | 0.016 | 0.7593 | 0.0333 | 757601 | 2.38E-09 | 35.63 | 4.70E-05 |
| rs718448 | T | C | 0.2063 | -0.0243 | 0.7428 | 0.2572 | 0.0163 | 0.1373 | 0.0346 | 757601 | 2.43E-09 | 35.59 | 4.70E-05 |
| rs72786098 | A | G | -0.5033 | 0.0034 | 0.9678 | 0.0322 | 0.0452 | 0.9407 | 0.0883 | 757601 | 1.18E-08 | 32.52 | 4.29E-05 |
| rs7340705 | T | C | -0.2425 | 0.0042 | 0.3268 | 0.6732 | 0.0151 | 0.7786 | 0.0322 | 757601 | 4.87E-14 | 56.78 | 7.49E-05 |
| rs7923191 | A | G | -0.369 | 0.0188 | 0.2082 | 0.7918 | 0.0178 | 0.2915 | 0.0376 | 757601 | 1.10E-22 | 96.09 | 1.27E-04 |
| rs9311502 | T | C | -0.2463 | 0.004 | 0.2391 | 0.7609 | 0.0168 | 0.8104 | 0.0355 | 757601 | 3.87E-12 | 48.19 | 6.36E-05 |
| rs982003 | T | C | -0.2414 | -0.0067 | 0.2432 | 0.7568 | 0.017 | 0.6913 | 0.0351 | 757601 | 6.21E-12 | 47.26 | 6.24E-05 |

**Additional file 4 Genome-wide significant and independentSNPs that were used as instruments for SBP**

| SNP | effect_allele | other_allele | beta.exposure | beta.outcome | eaf | se.outcome | pval.outcome | se.exposure | samplesize | pval.exposure |
| --- | --- | --- | --- | --- | --- | --- | --- | --- | --- | --- |
| rs1000423 | T | C | 0.4138 | -0.0033 | 0.2684 | 0.0167 | 0.8431 | 0.0346 | 757601 | 6.50E-33 |
| rs10043077 | T | C | -0.1931 | 0.0026 | 0.361 | 0.016 | 0.8692 | 0.0324 | 757601 | 2.52E-09 |
| rs10048404 | T | C | -0.2607 | 0.0028 | 0.6299 | 0.0157 | 0.8587 | 0.0317 | 757601 | 1.91E-16 |
| rs10048760 | T | G | -0.1862 | -0.0023 | 0.4712 | 0.0143 | 0.8705 | 0.0301 | 757601 | 6.56E-10 |
| rs1006545 | T | G | 0.6846 | 0.0045 | 0.1128 | 0.0227 | 0.842 | 0.048 | 757601 | 3.50E-46 |
| rs10069690 | T | C | 0.3098 | -0.0322 | 0.7418 | 0.0215 | 0.1336 | 0.0369 | 757601 | 4.47E-17 |
| rs10091532 | A | C | -0.2067 | -0.0206 | 0.5832 | 0.0145 | 0.1576 | 0.0305 | 757601 | 1.33E-11 |
| rs1010064 | A | C | 0.3571 | -0.0291 | 0.1837 | 0.0182 | 0.11 | 0.0387 | 757601 | 3.02E-20 |
| rs10188003 | T | C | 0.1883 | 0.0075 | 0.607 | 0.0147 | 0.6087 | 0.0307 | 757601 | 8.80E-10 |
| rs10207726 | T | C | -0.2142 | 0.0256 | 0.704 | 0.0157 | 0.1041 | 0.033 | 757601 | 8.06E-11 |
| rs10224210 | T | C | -0.3831 | -0.0029 | 0.2789 | 0.0164 | 0.8614 | 0.034 | 757601 | 1.60E-29 |
| rs10282122 | T | C | -0.302 | -0.0108 | 0.3316 | 0.0156 | 0.4893 | 0.0327 | 757601 | 2.46E-20 |
| rs10420519 | T | G | -0.4921 | -0.4627 | 0.9653 | 0.0539 | 9.14E-18 | 0.0887 | 757601 | 2.86E-08 |
| rs1043069 | T | G | 0.234 | -0.0145 | 0.3844 | 0.0148 | 0.3281 | 0.0311 | 757601 | 5.26E-14 |
| rs1044822 | T | C | -0.248 | 0.0304 | 0.8518 | 0.0202 | 0.1321 | 0.0424 | 757601 | 5.16E-09 |
| rs10460108 | A | G | 0.2141 | -0.0042 | 0.5199 | 0.0144 | 0.7678 | 0.0301 | 757601 | 1.12E-12 |
| rs10501122 | T | C | 0.1916 | 0.025 | 0.361 | 0.0151 | 0.09803 | 0.0315 | 757601 | 1.18E-09 |
| rs10501410 | A | G | 0.4122 | 0.021 | 0.9308 | 0.0294 | 0.4741 | 0.0607 | 757601 | 1.10E-11 |
| rs1052501 | T | C | 0.2262 | 0.0099 | 0.1671 | 0.0189 | 0.5995 | 0.0412 | 757601 | 4.14E-08 |
| rs10746963 | A | G | -0.2177 | 0.0053 | 0.8166 | 0.0189 | 0.7813 | 0.0388 | 757601 | 2.05E-08 |
| rs10749572 | T | G | -0.203 | 0.0187 | 0.4556 | 0.0143 | 0.1913 | 0.0302 | 757601 | 1.88E-11 |
| rs10776752 | T | G | 0.8211 | -0.0169 | 0.9191 | 0.0284 | 0.5519 | 0.0576 | 757601 | 4.61E-46 |
| rs10777213 | A | G | -0.1786 | 0.0206 | 0.4756 | 0.0143 | 0.1485 | 0.0299 | 757601 | 2.45E-09 |
| rs1077795 | A | G | 0.2507 | -0.0135 | 0.2607 | 0.0165 | 0.412 | 0.0344 | 757601 | 3.33E-13 |
| rs10782230 | A | G | 0.2106 | 0.0221 | 0.5155 | 0.0143 | 0.1205 | 0.0302 | 757601 | 2.91E-12 |
| rs10804330 | T | C | 0.2351 | 0.0073 | 0.4332 | 0.0145 | 0.6139 | 0.0306 | 757601 | 1.62E-14 |
| rs10866828 | T | C | 0.2476 | 0.0232 | 0.7504 | 0.0175 | 0.1847 | 0.0355 | 757601 | 3.19E-12 |
| rs10941043 | T | G | -0.2585 | 0.0059 | 0.2902 | 0.0157 | 0.7062 | 0.0332 | 757601 | 6.42E-15 |
| rs10980408 | T | C | -0.7606 | -0.0382 | 0.0359 | 0.0383 | 0.319 | 0.0827 | 757601 | 3.83E-20 |
| rs11097909 | T | C | -0.3628 | 0.0103 | 0.8528 | 0.0199 | 0.6044 | 0.043 | 757601 | 3.35E-17 |
| rs11120093 | T | C | -0.1792 | 0.0314 | 0.5918 | 0.0145 | 0.03027 | 0.0307 | 757601 | 5.13E-09 |
| rs11145807 | A | G | 0.2135 | -0.0019 | 0.5943 | 0.0154 | 0.9002 | 0.0322 | 757601 | 3.54E-11 |
| rs11159091 | A | G | 0.1978 | -0.0205 | 0.5385 | 0.0143 | 0.1516 | 0.0303 | 757601 | 6.79E-11 |
| rs111866816 | T | C | 0.3569 | -0.0589 | 0.9291 | 0.0277 | 0.03363 | 0.0597 | 757601 | 2.29E-09 |
| rs11191580 | T | C | 1.0995 | 0.0229 | 0.0824 | 0.0252 | 0.3626 | 0.055 | 757601 | 7.74E-89 |
| rs111929315 | A | G | 0.3146 | -0.0164 | 0.1083 | 0.0224 | 0.4634 | 0.0485 | 757601 | 8.60E-11 |
| rs11210029 | A | G | -0.203 | -0.0039 | 0.3678 | 0.0148 | 0.7911 | 0.0313 | 757601 | 8.92E-11 |
| rs11241313 | T | C | -0.2071 | 0.0126 | 0.6888 | 0.0154 | 0.4113 | 0.0326 | 757601 | 2.23E-10 |
| rs11252324 | T | G | -0.4164 | 0.0238 | 0.9229 | 0.0259 | 0.3568 | 0.0573 | 757601 | 3.61E-13 |
| rs113086489 | T | C | 0.3249 | -0.0374 | 0.4475 | 0.0147 | 0.01083 | 0.0307 | 757601 | 3.80E-26 |
| rs113264678 | T | C | 0.4063 | -0.0089 | 0.954 | 0.0338 | 0.7915 | 0.0727 | 757601 | 2.26E-08 |
| rs1133400 | A | G | -0.2975 | -0.0456 | 0.214 | 0.0178 | 0.01049 | 0.0376 | 757601 | 2.53E-15 |
| rs1154214 | T | G | -0.2031 | 0 | 0.6037 | 0.0145 | 0.9989 | 0.0306 | 757601 | 3.27E-11 |
| rs11592107 | A | G | 0.3024 | 0.0098 | 0.6904 | 0.0154 | 0.5265 | 0.0326 | 757601 | 1.55E-20 |
| rs116025100 | A | G | 0.5365 | 0.051 | 0.9617 | 0.041 | 0.2138 | 0.0851 | 757601 | 2.86E-10 |
| rs11604310 | T | C | -0.2778 | 0.0109 | 0.8345 | 0.0188 | 0.5639 | 0.0411 | 757601 | 1.46E-11 |
| rs11636952 | T | C | 0.5313 | -0.0212 | 0.6859 | 0.0153 | 0.1673 | 0.0328 | 757601 | 4.22E-59 |
| rs11641374 | A | C | -0.1943 | -0.0264 | 0.4005 | 0.0147 | 0.07192 | 0.0309 | 757601 | 3.26E-10 |
| rs11653927 | T | C | -0.2796 | -0.0471 | 0.6155 | 0.0146 | 0.001232 | 0.0308 | 757601 | 1.17E-19 |
| rs11655604 | T | C | -0.2033 | -0.0203 | 0.6421 | 0.018 | 0.2587 | 0.0333 | 757601 | 1.09E-09 |
| rs11672660 | T | C | 0.2212 | 0.02 | 0.8004 | 0.0178 | 0.2624 | 0.0381 | 757601 | 6.32E-09 |
| rs117206641 | T | C | 0.3154 | -0.0361 | 0.8892 | 0.0239 | 0.1315 | 0.0499 | 757601 | 2.66E-10 |
| rs117285318 | T | C | 0.4413 | -0.0168 | 0.0775 | 0.029 | 0.5617 | 0.0589 | 757601 | 6.93E-14 |
| rs117464403 | A | G | 0.864 | 0.0067 | 0.9817 | 0.0724 | 0.9268 | 0.1199 | 757601 | 5.80E-13 |
| rs11874246 | T | C | 0.2856 | -0.0055 | 0.7037 | 0.0157 | 0.7261 | 0.0328 | 757601 | 3.23E-18 |
| rs11925504 | A | G | -0.2901 | -0.0169 | 0.4279 | 0.0145 | 0.2438 | 0.0305 | 757601 | 1.78E-21 |
| rs11960210 | T | C | 0.4727 | 0.0148 | 0.3755 | 0.0145 | 0.3061 | 0.0313 | 757601 | 1.25E-51 |
| rs11977526 | A | G | -0.3213 | -0.0029 | 0.5991 | 0.0149 | 0.8449 | 0.0312 | 757601 | 6.62E-25 |
| rs1199330 | A | G | -0.2654 | 0.0236 | 0.1176 | 0.0225 | 0.295 | 0.047 | 757601 | 1.65E-08 |
| rs12042924 | T | C | -0.1807 | -0.0257 | 0.4716 | 0.0143 | 0.07152 | 0.0303 | 757601 | 2.62E-09 |
| rs12063372 | A | G | 0.1989 | 0.0018 | 0.6154 | 0.0154 | 0.9045 | 0.0318 | 757601 | 3.86E-10 |
| rs1209384 | A | G | 0.2558 | 7.00E-04 | 0.6122 | 0.015 | 0.9651 | 0.0313 | 757601 | 2.85E-16 |
| rs12136922 | A | G | 0.2027 | -0.0197 | 0.5051 | 0.0141 | 0.1641 | 0.0304 | 757601 | 2.69E-11 |
| rs12153395 | A | G | -0.3303 | -0.0099 | 0.8853 | 0.0244 | 0.6855 | 0.0486 | 757601 | 1.07E-11 |
| rs12255372 | T | G | 0.2358 | 0.0014 | 0.7117 | 0.0156 | 0.9289 | 0.0335 | 757601 | 1.94E-12 |
| rs12264186 | T | C | 0.2135 | -0.0055 | 0.8129 | 0.0184 | 0.763 | 0.0387 | 757601 | 3.58E-08 |
| rs12426261 | A | G | 0.3775 | -0.0038 | 0.6208 | 0.0146 | 0.7966 | 0.0309 | 757601 | 2.31E-34 |
| rs12446456 | T | C | -0.3003 | -0.0377 | 0.5726 | 0.0144 | 0.008659 | 0.0302 | 757601 | 2.97E-23 |
| rs12464602 | A | G | -0.2437 | -0.0015 | 0.3792 | 0.0152 | 0.9199 | 0.0315 | 757601 | 1.02E-14 |
| rs12473915 | A | G | -0.295 | -0.0158 | 0.7983 | 0.0177 | 0.374 | 0.0375 | 757601 | 3.42E-15 |
| rs12509595 | T | C | -0.8367 | 0.0216 | 0.2923 | 0.016 | 0.1766 | 0.0334 | 757601 | 2.55E-138 |
| rs12511987 | T | G | -0.2329 | 0.0324 | 0.1774 | 0.0192 | 0.09069 | 0.0399 | 757601 | 5.39E-09 |
| rs12596630 | T | C | 0.4278 | -0.021 | 0.9097 | 0.0259 | 0.4174 | 0.0547 | 757601 | 5.01E-15 |
| rs12627651 | A | G | 0.3498 | 0.012 | 0.7128 | 0.0166 | 0.4699 | 0.0341 | 757601 | 1.02E-24 |
| rs12637573 | A | G | -0.1731 | -0.0072 | 0.5282 | 0.0143 | 0.6153 | 0.0302 | 757601 | 9.95E-09 |
| rs12643599 | A | G | 0.3134 | 0.0124 | 0.3605 | 0.0148 | 0.4001 | 0.0313 | 757601 | 1.23E-23 |
| rs12656497 | T | C | -0.6382 | 0.0246 | 0.5966 | 0.0145 | 0.09028 | 0.0307 | 757601 | 7.14E-96 |
| rs12661036 | T | C | -0.2104 | 0.0073 | 0.225 | 0.0181 | 0.6852 | 0.0374 | 757601 | 1.82E-08 |
| rs12668436 | T | C | -0.2151 | -0.024 | 0.2459 | 0.0165 | 0.1454 | 0.035 | 757601 | 7.88E-10 |
| rs12693982 | T | C | 0.2575 | -0.0238 | 0.5976 | 0.0148 | 0.1085 | 0.0309 | 757601 | 7.49E-17 |
| rs12694277 | T | C | -0.2018 | -0.0025 | 0.7054 | 0.0157 | 0.8728 | 0.0335 | 757601 | 1.80E-09 |
| rs12731646 | T | C | -0.189 | 0.0035 | 0.591 | 0.0146 | 0.808 | 0.0307 | 757601 | 7.21E-10 |
| rs1275988 | T | C | -0.541 | -0.0144 | 0.3888 | 0.0147 | 0.3281 | 0.0308 | 757601 | 4.42E-69 |
| rs12885878 | A | G | -0.2291 | -0.0243 | 0.7663 | 0.0174 | 0.1616 | 0.0367 | 757601 | 4.32E-10 |
| rs12906962 | T | C | -0.2653 | 0.005 | 0.324 | 0.0156 | 0.7485 | 0.0325 | 757601 | 3.28E-16 |
| rs1290784 | T | C | 0.4124 | 0.0111 | 0.5517 | 0.0143 | 0.4366 | 0.0303 | 757601 | 2.97E-42 |
| rs1290933 | A | C | -0.2847 | 0.0202 | 0.3081 | 0.0157 | 0.1978 | 0.0327 | 757601 | 3.17E-18 |
| rs12926550 | A | G | -0.2548 | -0.014 | 0.6844 | 0.0154 | 0.3631 | 0.0324 | 757601 | 3.43E-15 |
| rs1293969 | T | C | -0.1988 | -0.0188 | 0.2516 | 0.0163 | 0.25 | 0.0347 | 757601 | 1.03E-08 |
| rs12985940 | T | C | 0.4642 | 0.0373 | 0.1592 | 0.0208 | 0.07219 | 0.0434 | 757601 | 1.08E-26 |
| rs13016772 | T | C | 0.2522 | 0.0462 | 0.2349 | 0.0168 | 0.006025 | 0.0355 | 757601 | 1.23E-12 |
| rs13107261 | A | G | -0.1778 | -0.005 | 0.6313 | 0.0148 | 0.7359 | 0.0314 | 757601 | 1.57E-08 |
| rs13107325 | T | C | -0.9086 | 0.0202 | 0.9261 | 0.0273 | 0.4607 | 0.0592 | 757601 | 4.22E-53 |
| rs13149209 | T | C | 0.281 | 0.0065 | 0.2227 | 0.0171 | 0.7022 | 0.0367 | 757601 | 1.97E-14 |
| rs13253358 | T | C | 0.2127 | 0.013 | 0.7021 | 0.0156 | 0.4047 | 0.033 | 757601 | 1.13E-10 |
| rs13289468 | A | C | 0.2488 | -0.008 | 0.4257 | 0.0146 | 0.582 | 0.0306 | 757601 | 3.93E-16 |
| rs1332813 | T | C | 0.2203 | 0 | 0.6486 | 0.0157 | 0.9976 | 0.0314 | 757601 | 2.32E-12 |
| rs13358657 | A | G | -0.388 | -0.0274 | 0.1332 | 0.0213 | 0.1986 | 0.0445 | 757601 | 2.95E-18 |
| rs13412750 | A | G | -0.2889 | 0.0108 | 0.7292 | 0.0161 | 0.5043 | 0.0341 | 757601 | 2.33E-17 |
| rs13420463 | A | G | 0.3143 | -0.0347 | 0.2266 | 0.0169 | 0.04048 | 0.036 | 757601 | 2.72E-18 |
| rs1375564 | T | C | 0.2579 | -0.0152 | 0.3605 | 0.0146 | 0.3 | 0.0315 | 757601 | 2.84E-16 |
| rs1382472 | A | G | -0.1917 | -0.009 | 0.5959 | 0.0146 | 0.5359 | 0.0307 | 757601 | 4.47E-10 |
| rs1408945 | T | G | -0.3196 | 0.0172 | 0.5757 | 0.0144 | 0.2336 | 0.0304 | 757601 | 8.33E-26 |
| rs1433121 | T | C | -0.228 | 0.0146 | 0.3094 | 0.0158 | 0.355 | 0.0326 | 757601 | 2.66E-12 |
| rs1436138 | A | G | 0.3119 | -0.016 | 0.3633 | 0.0151 | 0.2885 | 0.0315 | 757601 | 4.73E-23 |
| rs1437649 | A | G | -0.2189 | -0.0147 | 0.7655 | 0.0169 | 0.384 | 0.0357 | 757601 | 8.57E-10 |
| rs145042302 | A | G | -0.5886 | 0.0026 | 0.97 | 0.0478 | 0.9568 | 0.0972 | 757601 | 1.39E-09 |
| rs146550789 | T | C | -0.4824 | 0.0484 | 0.0417 | 0.0385 | 0.2087 | 0.0778 | 757601 | 5.64E-10 |
| rs148140538 | T | C | -0.3252 | -0.0639 | 0.9192 | 0.0266 | 0.01652 | 0.0562 | 757601 | 7.39E-09 |
| rs148401029 | A | C | -0.4623 | 0.0369 | 0.9648 | 0.0389 | 0.3439 | 0.0848 | 757601 | 4.97E-08 |
| rs1493132 | T | C | -0.1766 | 0.0298 | 0.3397 | 0.0151 | 0.04786 | 0.0318 | 757601 | 2.73E-08 |
| rs149339216 | T | C | -0.6912 | 0.0675 | 0.0434 | 0.0395 | 0.08799 | 0.0779 | 757601 | 6.93E-19 |
| rs1551355 | T | C | 0.2098 | -0.0275 | 0.7666 | 0.017 | 0.1043 | 0.0356 | 757601 | 3.89E-09 |
| rs1565440 | A | G | 0.1746 | 0.0294 | 0.6248 | 0.0147 | 0.04495 | 0.0311 | 757601 | 1.94E-08 |
| rs1575290 | T | C | 0.1973 | 0.0045 | 0.5267 | 0.0143 | 0.7522 | 0.0301 | 757601 | 5.59E-11 |
| rs1623474 | T | C | 0.3827 | -0.0203 | 0.6697 | 0.0151 | 0.1788 | 0.0321 | 757601 | 7.66E-33 |
| rs1624823 | A | G | 0.3371 | 0.0175 | 0.6199 | 0.0149 | 0.2405 | 0.0313 | 757601 | 4.26E-27 |
| rs1630736 | T | C | -0.1706 | -0.0246 | 0.535 | 0.0157 | 0.1166 | 0.0309 | 757601 | 3.52E-08 |
| rs167479 | T | G | -0.5642 | 0.0159 | 0.5274 | 0.0222 | 0.4738 | 0.0327 | 757601 | 7.21E-67 |
| rs17010957 | T | C | -0.534 | -0.0099 | 0.1463 | 0.0208 | 0.6349 | 0.043 | 757601 | 1.78E-35 |
| rs17035181 | T | G | 0.3074 | -0.0097 | 0.1448 | 0.0205 | 0.6374 | 0.0429 | 757601 | 7.61E-13 |
| rs17245822 | A | C | -0.1899 | -0.013 | 0.3733 | 0.0147 | 0.3767 | 0.0312 | 757601 | 1.15E-09 |
| rs17249754 | A | G | -0.8446 | -0.0029 | 0.8317 | 0.0189 | 0.8767 | 0.0403 | 757601 | 1.25E-97 |
| rs17257081 | A | G | 0.2274 | -0.0226 | 0.1935 | 0.0172 | 0.1883 | 0.0392 | 757601 | 6.35E-09 |
| rs1745417 | T | C | 0.2871 | 0.0134 | 0.4799 | 0.0143 | 0.3492 | 0.0301 | 757601 | 1.59E-21 |
| rs17562391 | T | C | 0.1967 | -0.004 | 0.5814 | 0.0146 | 0.7837 | 0.0306 | 757601 | 1.35E-10 |
| rs17608766 | T | C | -0.6903 | 0.0216 | 0.1445 | 0.0213 | 0.3112 | 0.0433 | 757601 | 2.48E-57 |
| rs17684859 | T | C | -0.2241 | 0.004 | 0.2665 | 0.0162 | 0.8038 | 0.034 | 757601 | 4.24E-11 |
| rs17760259 | T | C | -0.2654 | -7.00E-04 | 0.4276 | 0.0143 | 0.9599 | 0.0304 | 757601 | 2.25E-18 |
| rs17762 | A | G | 0.4117 | -0.0395 | 0.9223 | 0.0265 | 0.1356 | 0.0571 | 757601 | 5.60E-13 |
| rs17812022 | T | C | -0.3613 | 0.0457 | 0.9042 | 0.0256 | 0.07428 | 0.0525 | 757601 | 5.65E-12 |
| rs1814951 | A | G | -0.3231 | 1.00E-04 | 0.1215 | 0.0214 | 0.997 | 0.0466 | 757601 | 3.91E-12 |
| rs1871190 | T | G | 0.1954 | -0.0033 | 0.6651 | 0.0153 | 0.8282 | 0.0324 | 757601 | 1.66E-09 |
| rs1882961 | T | C | 0.2443 | 0.0045 | 0.6913 | 0.0156 | 0.7731 | 0.0326 | 757601 | 6.69E-14 |
| rs1889785 | A | G | 0.1782 | -0.0083 | 0.5448 | 0.0143 | 0.5624 | 0.0304 | 757601 | 4.35E-09 |
| rs1896326 | A | G | -0.2797 | -0.0166 | 0.7709 | 0.0179 | 0.3522 | 0.0371 | 757601 | 4.41E-14 |
| rs1906672 | A | G | 0.2966 | -0.0097 | 0.7681 | 0.0172 | 0.5745 | 0.0358 | 757601 | 1.20E-16 |
| rs1957563 | T | C | 0.3629 | -0.015 | 0.735 | 0.0162 | 0.3532 | 0.0342 | 757601 | 2.32E-26 |
| rs1984195 | A | G | 0.2409 | 0.0194 | 0.5113 | 0.0142 | 0.1728 | 0.0303 | 757601 | 1.77E-15 |
| rs2014408 | T | C | 0.5169 | -0.0281 | 0.7913 | 0.0177 | 0.1119 | 0.0373 | 757601 | 1.26E-43 |
| rs2046341 | A | G | -0.2542 | -0.0089 | 0.8079 | 0.0182 | 0.6251 | 0.0382 | 757601 | 2.74E-11 |
| rs2060664 | T | C | 0.216 | 0.0154 | 0.2516 | 0.0166 | 0.3532 | 0.0345 | 757601 | 4.06E-10 |
| rs2065498 | T | G | -0.2934 | 0.0022 | 0.8294 | 0.0185 | 0.9053 | 0.0403 | 757601 | 3.36E-13 |
| rs2111557 | T | C | 0.1764 | -8.00E-04 | 0.5325 | 0.0142 | 0.9538 | 0.0302 | 757601 | 5.22E-09 |
| rs2113077 | A | G | 0.2097 | 0.0127 | 0.5697 | 0.0148 | 0.3875 | 0.0305 | 757601 | 6.09E-12 |
| rs2126474 | T | G | -0.2601 | -0.0027 | 0.5875 | 0.0148 | 0.8559 | 0.0306 | 757601 | 1.87E-17 |
| rs2161967 | T | G | 0.2836 | -0.0073 | 0.5721 | 0.0146 | 0.6157 | 0.0307 | 757601 | 2.87E-20 |
| rs2177843 | T | C | 0.4394 | -0.0409 | 0.8495 | 0.0204 | 0.04538 | 0.0432 | 757601 | 2.80E-24 |
| rs2232460 | A | G | -0.2171 | 0.0308 | 0.6657 | 0.015 | 0.04098 | 0.032 | 757601 | 1.10E-11 |
| rs2236295 | T | G | -0.3028 | 0.0301 | 0.6022 | 0.0148 | 0.04159 | 0.0309 | 757601 | 1.05E-22 |
| rs2238787 | A | G | 0.2552 | -0.0302 | 0.708 | 0.0158 | 0.0565 | 0.0332 | 757601 | 1.45E-14 |
| rs2249105 | A | G | 0.2927 | 0.0128 | 0.3679 | 0.0147 | 0.3853 | 0.0313 | 757601 | 7.63E-21 |
| rs2289124 | A | G | -0.308 | 0.002 | 0.8327 | 0.0198 | 0.9205 | 0.0415 | 757601 | 1.14E-13 |
| rs2291434 | T | G | -0.2622 | -0.0118 | 0.4665 | 0.0146 | 0.4209 | 0.0303 | 757601 | 5.10E-18 |
| rs2306363 | T | G | -0.4358 | 0.0109 | 0.7955 | 0.0179 | 0.5412 | 0.0376 | 757601 | 5.24E-31 |
| rs2327429 | T | C | 0.2 | -0.0163 | 0.2917 | 0.016 | 0.3086 | 0.0338 | 757601 | 3.16E-09 |
| rs234623 | A | G | -0.1804 | 0.0128 | 0.4959 | 0.0145 | 0.3768 | 0.0302 | 757601 | 2.43E-09 |
| rs2353940 | T | C | -0.2075 | 0.0354 | 0.2493 | 0.0172 | 0.03927 | 0.0358 | 757601 | 6.85E-09 |
| rs2354862 | A | C | 0.2507 | 0.0143 | 0.3593 | 0.0148 | 0.3351 | 0.0317 | 757601 | 2.42E-15 |
| rs236916 | A | G | 0.3166 | 0.0488 | 0.8652 | 0.0208 | 0.01899 | 0.0446 | 757601 | 1.31E-12 |
| rs2384063 | T | C | 0.3266 | 0.0235 | 0.2393 | 0.0173 | 0.1737 | 0.0357 | 757601 | 6.33E-20 |
| rs2392929 | T | G | -0.7507 | -0.0054 | 0.2027 | 0.0182 | 0.7674 | 0.0379 | 757601 | 1.96E-87 |
| rs2423514 | A | G | 0.3011 | -2.00E-04 | 0.4589 | 0.0143 | 0.991 | 0.0302 | 757601 | 1.77E-23 |
| rs246973 | T | C | 0.2479 | -0.0082 | 0.7118 | 0.016 | 0.608 | 0.0335 | 757601 | 1.45E-13 |
| rs2470004 | T | C | -0.3454 | -0.0223 | 0.1825 | 0.0183 | 0.223 | 0.0392 | 757601 | 1.28E-18 |
| rs2493296 | T | C | 0.4183 | -0.0254 | 0.8575 | 0.0206 | 0.2172 | 0.0442 | 757601 | 3.14E-21 |
| rs2498323 | A | G | 0.3171 | -0.0493 | 0.902 | 0.0239 | 0.03945 | 0.0517 | 757601 | 8.52E-10 |
| rs2580350 | A | G | 0.1769 | 0.0077 | 0.4391 | 0.0147 | 0.6014 | 0.0307 | 757601 | 8.39E-09 |
| rs2589218 | T | C | -0.2258 | -0.0101 | 0.2703 | 0.0161 | 0.5293 | 0.0339 | 757601 | 2.54E-11 |
| rs2598 | A | G | 0.168 | -0.012 | 0.467 | 0.0144 | 0.4048 | 0.0303 | 757601 | 2.87E-08 |
| rs2610990 | A | G | -0.2903 | -0.0231 | 0.7359 | 0.0164 | 0.1587 | 0.0343 | 757601 | 2.86E-17 |
| rs2627313 | T | C | 0.3208 | 0.0276 | 0.5546 | 0.0143 | 0.05318 | 0.0303 | 757601 | 3.55E-26 |
| rs262986 | A | G | -0.2371 | -0.0179 | 0.5296 | 0.0146 | 0.22 | 0.0305 | 757601 | 7.67E-15 |
| rs263532 | T | C | 0.1798 | 6.00E-04 | 0.4245 | 0.0146 | 0.9657 | 0.0307 | 757601 | 4.72E-09 |
| rs2643826 | T | C | 0.4473 | 0.0163 | 0.5495 | 0.0146 | 0.2646 | 0.0306 | 757601 | 1.74E-48 |
| rs2652812 | T | C | -0.2516 | 0.0215 | 0.2456 | 0.0166 | 0.1935 | 0.0353 | 757601 | 1.03E-12 |
| rs2655445 | A | G | -0.2018 | -0.0203 | 0.3933 | 0.0149 | 0.1736 | 0.0312 | 757601 | 9.58E-11 |
| rs2689690 | T | C | -0.2702 | 0.0114 | 0.6322 | 0.0149 | 0.4456 | 0.0316 | 757601 | 1.15E-17 |
| rs2724377 | A | G | 0.1938 | -0.0145 | 0.4697 | 0.0144 | 0.3138 | 0.0301 | 757601 | 1.29E-10 |
| rs2745599 | A | G | 0.2164 | 0.0012 | 0.448 | 0.016 | 0.9386 | 0.0317 | 757601 | 8.96E-12 |
| rs2753960 | T | G | 0.4466 | -0.0071 | 0.5801 | 0.0145 | 0.6249 | 0.0309 | 757601 | 2.66E-47 |
| rs2776037 | T | C | -0.1851 | 0.0096 | 0.5849 | 0.0146 | 0.5105 | 0.0309 | 757601 | 2.15E-09 |
| rs2815063 | A | C | 0.2755 | 0.0565 | 0.8685 | 0.022 | 0.01026 | 0.0458 | 757601 | 1.76E-09 |
| rs2833834 | A | C | 0.2177 | 0.0308 | 0.7235 | 0.0159 | 0.05271 | 0.0338 | 757601 | 1.22E-10 |
| rs28374392 | T | C | 0.1924 | -0.0038 | 0.3769 | 0.0168 | 0.8205 | 0.0338 | 757601 | 1.21E-08 |
| rs28429256 | A | G | 0.215 | 0.0319 | 0.6658 | 0.0159 | 0.04475 | 0.0325 | 757601 | 3.89E-11 |
| rs28572357 | A | C | -0.2733 | 0.0263 | 0.3977 | 0.0148 | 0.07574 | 0.0308 | 757601 | 6.34E-19 |
| rs28578714 | T | C | 0.2066 | 0.0268 | 0.3938 | 0.0177 | 0.1293 | 0.0327 | 757601 | 2.53E-10 |
| rs28688791 | T | C | -0.3222 | 0.0074 | 0.1982 | 0.0177 | 0.6761 | 0.038 | 757601 | 2.34E-17 |
| rs28866311 | T | G | -0.2762 | 0.0198 | 0.4737 | 0.0147 | 0.1783 | 0.0302 | 757601 | 5.45E-20 |
| rs2900568 | T | C | -0.1889 | -0.0021 | 0.4816 | 0.0142 | 0.8837 | 0.03 | 757601 | 2.96E-10 |
| rs2904315 | A | G | -0.2081 | 0.0349 | 0.6869 | 0.0154 | 0.02344 | 0.0325 | 757601 | 1.58E-10 |
| rs2913920 | T | C | 0.2418 | -0.0211 | 0.235 | 0.0167 | 0.2074 | 0.0359 | 757601 | 1.62E-11 |
| rs3098186 | T | C | -0.2422 | -0.045 | 0.4844 | 0.0146 | 0.001971 | 0.0303 | 757601 | 1.41E-15 |
| rs33836 | T | C | 0.1766 | 0.0126 | 0.5378 | 0.0145 | 0.3844 | 0.0304 | 757601 | 6.56E-09 |
| rs34025993 | A | G | 0.223 | 0.0032 | 0.586 | 0.015 | 0.8293 | 0.0308 | 757601 | 4.71E-13 |
| rs34072724 | A | G | -0.2422 | -0.0058 | 0.5111 | 0.0146 | 0.6915 | 0.0303 | 757601 | 1.37E-15 |
| rs34079867 | T | C | 0.1992 | -0.0171 | 0.734 | 0.0174 | 0.3235 | 0.0354 | 757601 | 1.78E-08 |
| rs34130368 | T | G | -0.3016 | 4.00E-04 | 0.883 | 0.0244 | 0.9872 | 0.0497 | 757601 | 1.28E-09 |
| rs34487963 | A | C | -0.8819 | 0.0263 | 0.9815 | 0.06 | 0.6607 | 0.1244 | 757601 | 1.35E-12 |
| rs34496659 | A | G | 0.4545 | -0.0055 | 0.9298 | 0.0301 | 0.8541 | 0.0616 | 757601 | 1.54E-13 |
| rs34535756 | T | C | 0.478 | -0.0168 | 0.9606 | 0.0361 | 0.6411 | 0.0786 | 757601 | 1.18E-09 |
| rs34941092 | A | G | -0.3225 | 0.0349 | 0.8502 | 0.0199 | 0.08011 | 0.0425 | 757601 | 3.23E-14 |
| rs35413927 | A | G | -0.3002 | 0.0195 | 0.3054 | 0.0156 | 0.2114 | 0.0328 | 757601 | 5.25E-20 |
| rs35444 | A | G | 0.4368 | 0.0077 | 0.3862 | 0.0149 | 0.6036 | 0.031 | 757601 | 3.47E-45 |
| rs35680304 | T | C | 0.2694 | 0.0059 | 0.4071 | 0.0148 | 0.6903 | 0.031 | 757601 | 3.76E-18 |
| rs35783704 | A | G | -0.4619 | -0.0238 | 0.8958 | 0.0249 | 0.3391 | 0.0507 | 757601 | 8.81E-20 |
| rs360153 | T | C | -0.3445 | 0.015 | 0.5834 | 0.0145 | 0.2994 | 0.0306 | 757601 | 1.73E-29 |
| rs365990 | A | G | 0.225 | 0.0058 | 0.3658 | 0.015 | 0.6958 | 0.0312 | 757601 | 5.95E-13 |
| rs3735533 | T | C | -0.91 | -0.0173 | 0.9257 | 0.0277 | 0.5309 | 0.0577 | 757601 | 5.29E-56 |
| rs3754944 | A | C | 0.1768 | -0.0028 | 0.4125 | 0.0144 | 0.846 | 0.0308 | 757601 | 9.30E-09 |
| rs3764400 | T | C | 0.3748 | -0.0511 | 0.1365 | 0.0217 | 0.01864 | 0.0445 | 757601 | 3.69E-17 |
| rs3772219 | A | C | 0.2733 | -0.0441 | 0.3176 | 0.0155 | 0.004517 | 0.0324 | 757601 | 3.10E-17 |
| rs3807925 | A | G | -0.1859 | -4.00E-04 | 0.3504 | 0.0152 | 0.9813 | 0.0319 | 757601 | 5.39E-09 |
| rs3819532 | T | C | -0.1875 | 0.0014 | 0.6087 | 0.0146 | 0.9234 | 0.0306 | 757601 | 9.44E-10 |
| rs3860770 | A | G | -0.2663 | -0.0034 | 0.7084 | 0.0161 | 0.83 | 0.0333 | 757601 | 1.20E-15 |
| rs3918226 | T | C | 0.664 | -0.0337 | 0.9189 | 0.0284 | 0.2361 | 0.0575 | 757601 | 8.46E-31 |
| rs3950627 | A | C | 0.1851 | 0.004 | 0.469 | 0.0144 | 0.7834 | 0.0308 | 757601 | 1.82E-09 |
| rs3980686 | T | G | -0.4998 | 0.0095 | 0.8925 | 0.0221 | 0.6662 | 0.0487 | 757601 | 1.03E-24 |
| rs404100 | T | C | 0.1935 | 0.0045 | 0.5487 | 0.0143 | 0.7512 | 0.0303 | 757601 | 1.68E-10 |
| rs4143175 | T | C | 0.2187 | 0.0114 | 0.7591 | 0.017 | 0.5022 | 0.0352 | 757601 | 5.10E-10 |
| rs42377 | A | G | -0.3153 | -0.0534 | 0.6955 | 0.0154 | 0.0005432 | 0.0331 | 757601 | 1.69E-21 |
| rs4245599 | A | G | -0.1794 | 0.0285 | 0.5416 | 0.0143 | 0.04621 | 0.0305 | 757601 | 4.04E-09 |
| rs4286632 | A | G | 0.211 | 0 | 0.2694 | 0.0167 | 0.998 | 0.0343 | 757601 | 7.64E-10 |
| rs4408839 | A | G | -0.2301 | 0.0082 | 0.2567 | 0.0166 | 0.6222 | 0.0345 | 757601 | 2.43E-11 |
| rs4427587 | T | C | 0.2062 | -0.013 | 0.4381 | 0.015 | 0.3865 | 0.0313 | 757601 | 4.28E-11 |
| rs4440615 | A | G | -0.2201 | 0.0204 | 0.3679 | 0.0149 | 0.1724 | 0.0312 | 757601 | 1.87E-12 |
| rs4511593 | T | C | -0.2881 | -0.0089 | 0.3472 | 0.0151 | 0.5568 | 0.0318 | 757601 | 1.28E-19 |
| rs4553000 | T | C | -0.2035 | -0.0182 | 0.4859 | 0.0142 | 0.2006 | 0.03 | 757601 | 1.09E-11 |
| rs4577304 | T | C | -0.1767 | -0.021 | 0.4767 | 0.0144 | 0.144 | 0.0302 | 757601 | 4.99E-09 |
| rs4595370 | A | G | -0.2092 | -0.0022 | 0.6988 | 0.0154 | 0.8858 | 0.0328 | 757601 | 1.73E-10 |
| rs4598218 | T | C | 0.1911 | -0.0106 | 0.3842 | 0.0148 | 0.4721 | 0.0313 | 757601 | 1.00E-09 |
| rs4606697 | A | G | -0.3196 | 0.0016 | 0.8959 | 0.0281 | 0.956 | 0.0523 | 757601 | 9.71E-10 |
| rs4651224 | T | C | 0.1986 | 0.0149 | 0.5526 | 0.0144 | 0.3007 | 0.0306 | 757601 | 9.00E-11 |
| rs4667454 | A | G | 0.2636 | -0.0026 | 0.3295 | 0.0155 | 0.8663 | 0.0322 | 757601 | 2.63E-16 |
| rs4775769 | T | G | -0.4162 | -0.0105 | 0.9055 | 0.024 | 0.6624 | 0.0517 | 757601 | 7.76E-16 |
| rs4784541 | T | C | -0.2015 | -0.0198 | 0.5252 | 0.0152 | 0.1937 | 0.0307 | 757601 | 4.93E-11 |
| rs483071 | T | C | 0.2709 | -0.0046 | 0.3752 | 0.0149 | 0.7576 | 0.0313 | 757601 | 5.09E-18 |
| rs4873492 | T | C | 0.3431 | 0.0199 | 0.8276 | 0.0185 | 0.2812 | 0.0403 | 757601 | 1.61E-17 |
| rs488834 | T | C | -0.3799 | -0.0111 | 0.2355 | 0.0173 | 0.5215 | 0.0365 | 757601 | 2.35E-25 |
| rs4888408 | A | G | 0.3653 | -0.0132 | 0.4145 | 0.0146 | 0.3678 | 0.0307 | 757601 | 1.42E-32 |
| rs4894132 | T | C | 0.2469 | -8.00E-04 | 0.2717 | 0.0167 | 0.9598 | 0.0342 | 757601 | 5.51E-13 |
| rs4908348 | T | G | 0.2366 | 0.0136 | 0.3056 | 0.016 | 0.394 | 0.033 | 757601 | 8.07E-13 |
| rs4925159 | A | G | 0.2174 | 0.0166 | 0.5754 | 0.0144 | 0.2491 | 0.0305 | 757601 | 9.66E-13 |
| rs4932373 | A | C | -0.635 | -0.0052 | 0.3258 | 0.0163 | 0.7484 | 0.0328 | 757601 | 2.49E-83 |
| rs4948643 | T | C | 0.2258 | -0.0037 | 0.7181 | 0.0158 | 0.8167 | 0.0338 | 757601 | 2.40E-11 |
| rs4952609 | A | G | 0.2124 | -0.021 | 0.2561 | 0.0163 | 0.1977 | 0.0347 | 757601 | 9.60E-10 |
| rs4955575 | A | C | 0.2158 | -0.0262 | 0.2539 | 0.0165 | 0.1116 | 0.0348 | 757601 | 5.63E-10 |
| rs4957026 | A | G | 0.1982 | 0.0094 | 0.6601 | 0.0152 | 0.5377 | 0.0323 | 757601 | 8.12E-10 |
| rs4961293 | T | C | 0.2268 | 0.004 | 0.5487 | 0.0144 | 0.7824 | 0.0303 | 757601 | 7.35E-14 |
| rs5020545 | T | C | -0.2179 | -0.0052 | 0.5563 | 0.0146 | 0.7223 | 0.0305 | 757601 | 9.71E-13 |
| rs509833 | A | G | 0.329 | -0.0163 | 0.8614 | 0.0209 | 0.4367 | 0.044 | 757601 | 7.08E-14 |
| rs55924432 | T | C | 0.2651 | -0.0179 | 0.599 | 0.0156 | 0.2522 | 0.0317 | 757601 | 5.70E-17 |
| rs55944332 | A | G | -0.2613 | 0.0081 | 0.2368 | 0.017 | 0.6349 | 0.0355 | 757601 | 1.79E-13 |
| rs56288724 | A | G | -0.2178 | -0.0161 | 0.4169 | 0.0149 | 0.278 | 0.031 | 757601 | 2.01E-12 |
| rs56407827 | T | C | 0.3603 | -8.00E-04 | 0.7313 | 0.0161 | 0.9609 | 0.034 | 757601 | 2.78E-26 |
| rs569550 | T | G | -0.5765 | 0.0191 | 0.3963 | 0.0152 | 0.209 | 0.0318 | 757601 | 1.33E-73 |
| rs571689 | T | C | 0.228 | 0.0208 | 0.4804 | 0.0146 | 0.1536 | 0.0304 | 757601 | 6.77E-14 |
| rs573455 | A | G | 0.1994 | 0.0108 | 0.539 | 0.0145 | 0.4578 | 0.0303 | 757601 | 4.77E-11 |
| rs5742643 | T | C | -0.2233 | -0.023 | 0.7513 | 0.0166 | 0.1654 | 0.0349 | 757601 | 1.53E-10 |
| rs57946343 | T | C | 0.716 | 0.0043 | 0.1473 | 0.0199 | 0.8308 | 0.0426 | 757601 | 2.10E-63 |
| rs59980837 | T | G | 1.0997 | 0.0703 | 0.9822 | 0.0567 | 0.2152 | 0.1163 | 757601 | 3.32E-21 |
| rs60191654 | A | G | -0.2382 | -0.009 | 0.1882 | 0.0193 | 0.642 | 0.0385 | 757601 | 5.88E-10 |
| rs6029756 | A | G | -0.2712 | 0.0101 | 0.6775 | 0.0159 | 0.5257 | 0.033 | 757601 | 1.88E-16 |
| rs6031431 | A | G | -0.2617 | -0.0124 | 0.4624 | 0.0146 | 0.3925 | 0.0304 | 757601 | 7.05E-18 |
| rs604723 | T | C | -0.655 | -0.001 | 0.7244 | 0.0158 | 0.9477 | 0.0339 | 757601 | 2.55E-83 |
| rs6054139 | A | G | 0.2094 | 0.001 | 0.394 | 0.0147 | 0.9453 | 0.0306 | 757601 | 8.23E-12 |
| rs6058088 | T | G | 0.2832 | 0.0013 | 0.1561 | 0.0195 | 0.9487 | 0.0417 | 757601 | 1.14E-11 |
| rs6062324 | A | G | -0.3294 | 0.0322 | 0.7636 | 0.0173 | 0.06191 | 0.0363 | 757601 | 1.18E-19 |
| rs6078093 | A | G | -0.1849 | -0.0059 | 0.572 | 0.0148 | 0.6899 | 0.0304 | 757601 | 1.20E-09 |
| rs6090907 | A | G | -0.3854 | 0.0385 | 0.853 | 0.0199 | 0.05356 | 0.0425 | 757601 | 1.29E-19 |
| rs60991988 | T | G | 0.3789 | 0.0083 | 0.1069 | 0.0228 | 0.7157 | 0.0498 | 757601 | 2.82E-14 |
| rs6108787 | T | G | -0.4274 | 0.0014 | 0.4704 | 0.0143 | 0.9233 | 0.03 | 757601 | 5.38E-46 |
| rs61772592 | A | G | -0.3181 | -0.016 | 0.1255 | 0.0214 | 0.4557 | 0.0455 | 757601 | 2.86E-12 |
| rs61917655 | T | C | 0.3427 | -0.0013 | 0.8986 | 0.0245 | 0.9578 | 0.0514 | 757601 | 2.68E-11 |
| rs62047964 | T | C | 0.5115 | -0.1042 | 0.9378 | 0.0353 | 0.003208 | 0.0686 | 757601 | 9.29E-14 |
| rs62076622 | A | G | 0.2363 | -0.0368 | 0.1987 | 0.0181 | 0.0416 | 0.0377 | 757601 | 3.79E-10 |
| rs62112908 | A | G | -0.2388 | 0.0034 | 0.1536 | 0.02 | 0.8632 | 0.0419 | 757601 | 1.25E-08 |
| rs62170470 | T | C | 0.1972 | -0.0281 | 0.3983 | 0.0154 | 0.06741 | 0.0321 | 757601 | 7.69E-10 |
| rs62187653 | T | C | 0.3286 | 0.0155 | 0.0971 | 0.0235 | 0.5093 | 0.0511 | 757601 | 1.23E-10 |
| rs62309747 | A | G | -0.2244 | 0.0332 | 0.5266 | 0.0145 | 0.02192 | 0.0304 | 757601 | 1.59E-13 |
| rs6271 | T | C | -0.5547 | -0.0258 | 0.9265 | 0.037 | 0.4865 | 0.0611 | 757601 | 1.18E-19 |
| rs629864 | T | C | -0.1868 | 0.006 | 0.3503 | 0.0151 | 0.6931 | 0.0319 | 757601 | 4.69E-09 |
| rs6438857 | T | C | 0.2736 | 0.0237 | 0.4226 | 0.0144 | 0.09943 | 0.0305 | 757601 | 3.13E-19 |
| rs6445583 | A | G | 0.2774 | -0.0173 | 0.2535 | 0.0167 | 0.2998 | 0.0349 | 757601 | 1.90E-15 |
| rs6452769 | A | G | -0.3143 | -0.0128 | 0.7947 | 0.0177 | 0.4693 | 0.0377 | 757601 | 7.82E-17 |
| rs6490019 | A | G | -0.2897 | 0.0195 | 0.6204 | 0.0147 | 0.1841 | 0.0309 | 757601 | 6.61E-21 |
| rs6504213 | T | C | -0.2982 | -0.0046 | 0.5818 | 0.0153 | 0.7647 | 0.0312 | 757601 | 1.25E-21 |
| rs6539467 | A | G | 0.265 | 0.0222 | 0.8339 | 0.0191 | 0.2454 | 0.0404 | 757601 | 5.57E-11 |
| rs6562778 | A | G | 0.178 | -0.0085 | 0.5411 | 0.0148 | 0.5636 | 0.0304 | 757601 | 4.96E-09 |
| rs658780 | T | G | -0.2028 | 0.0193 | 0.2553 | 0.0167 | 0.2496 | 0.0347 | 757601 | 5.29E-09 |
| rs665445 | A | C | -0.1909 | 0.011 | 0.7206 | 0.0158 | 0.488 | 0.0334 | 757601 | 1.15E-08 |
| rs6731373 | A | G | 0.1913 | 6.00E-04 | 0.6508 | 0.0162 | 0.9704 | 0.0326 | 757601 | 4.18E-09 |
| rs6737318 | A | G | 0.2348 | 0.0073 | 0.2218 | 0.0174 | 0.673 | 0.0364 | 757601 | 1.13E-10 |
| rs6771917 | T | C | -0.3793 | -0.0105 | 0.7523 | 0.0165 | 0.5254 | 0.0355 | 757601 | 1.39E-26 |
| rs6788984 | A | G | 0.2999 | -0.0116 | 0.1437 | 0.0195 | 0.5509 | 0.0432 | 757601 | 3.81E-12 |
| rs68085857 | T | C | 0.274 | -0.0213 | 0.766 | 0.0167 | 0.2042 | 0.0357 | 757601 | 1.68E-14 |
| rs68096471 | A | G | -0.2098 | -0.0129 | 0.7341 | 0.0167 | 0.4396 | 0.0343 | 757601 | 9.26E-10 |
| rs68115553 | A | G | -0.6445 | -0.0317 | 0.0199 | 0.0583 | 0.5869 | 0.1143 | 757601 | 1.74E-08 |
| rs6823199 | T | C | 0.2094 | -0.02 | 0.2562 | 0.0163 | 0.2191 | 0.0348 | 757601 | 1.72E-09 |
| rs6870654 | T | C | 0.2136 | 0.0088 | 0.2546 | 0.0162 | 0.5862 | 0.0347 | 757601 | 7.58E-10 |
| rs6892983 | A | C | 0.3427 | 0.0053 | 0.5978 | 0.0145 | 0.7132 | 0.0307 | 757601 | 7.11E-29 |
| rs6921291 | T | C | 0.3575 | -0.0319 | 0.8093 | 0.0179 | 0.07549 | 0.0385 | 757601 | 1.58E-20 |
| rs6959688 | A | G | -0.2344 | 0.033 | 0.4019 | 0.0148 | 0.02597 | 0.031 | 757601 | 4.22E-14 |
| rs698748 | A | G | 0.1871 | -0.0012 | 0.579 | 0.0166 | 0.9442 | 0.0325 | 757601 | 8.90E-09 |
| rs699 | A | G | -0.3748 | 0.0314 | 0.4072 | 0.0144 | 0.02953 | 0.0308 | 757601 | 5.59E-34 |
| rs7012866 | T | G | -0.2325 | 0.0076 | 0.5009 | 0.0142 | 0.5953 | 0.0301 | 757601 | 1.21E-14 |
| rs702395 | T | C | 0.2318 | 0.0408 | 0.5631 | 0.0146 | 0.005262 | 0.0305 | 757601 | 3.24E-14 |
| rs7093894 | A | C | 0.236 | 0.0487 | 0.8488 | 0.0197 | 0.0133 | 0.0427 | 757601 | 3.16E-08 |
| rs7107356 | A | G | -0.4598 | -0.0668 | 0.5041 | 0.0143 | 2.79E-06 | 0.0301 | 757601 | 1.63E-52 |
| rs7125196 | T | C | 0.4422 | -0.0017 | 0.1183 | 0.0231 | 0.9407 | 0.0472 | 757601 | 7.31E-21 |
| rs7134440 | T | C | 0.4788 | -0.0383 | 0.9178 | 0.027 | 0.1554 | 0.0562 | 757601 | 1.58E-17 |
| rs7134677 | T | C | -0.3851 | -0.0077 | 0.7022 | 0.0162 | 0.6344 | 0.0332 | 757601 | 4.46E-31 |
| rs7154723 | A | G | 0.253 | -0.0068 | 0.615 | 0.0146 | 0.64 | 0.0309 | 757601 | 2.72E-16 |
| rs7186298 | T | C | -0.2315 | 0.0283 | 0.5705 | 0.0145 | 0.05146 | 0.0302 | 757601 | 1.88E-14 |
| rs7213273 | A | G | -0.4 | -0.004 | 0.345 | 0.0149 | 0.7883 | 0.0315 | 757601 | 6.24E-37 |
| rs7218708 | A | G | -0.1781 | -0.0175 | 0.5169 | 0.0143 | 0.2212 | 0.0303 | 757601 | 4.38E-09 |
| rs7245140 | T | C | -0.3367 | 0.0071 | 0.1802 | 0.0186 | 0.7041 | 0.0391 | 757601 | 7.67E-18 |
| rs7255933 | A | G | 0.2306 | -0.0569 | 0.7426 | 0.0166 | 0.0006272 | 0.0345 | 757601 | 2.44E-11 |
| rs72683923 | T | C | 0.9587 | 0.1035 | 0.0212 | 0.0504 | 0.03993 | 0.1101 | 757601 | 3.08E-18 |
| rs72778133 | T | C | -0.2417 | -0.0038 | 0.1422 | 0.0214 | 0.8585 | 0.0443 | 757601 | 4.98E-08 |
| rs7278003 | T | C | -0.1876 | -0.0078 | 0.5622 | 0.0144 | 0.5904 | 0.0304 | 757601 | 6.63E-10 |
| rs72842207 | T | C | -0.203 | 0.0159 | 0.7856 | 0.0175 | 0.3621 | 0.0367 | 757601 | 3.14E-08 |
| rs72847885 | A | G | 0.2413 | -0.003 | 0.337 | 0.015 | 0.8394 | 0.0318 | 757601 | 3.08E-14 |
| rs73046792 | A | G | -0.3554 | -0.0222 | 0.8412 | 0.0213 | 0.2965 | 0.0426 | 757601 | 7.23E-17 |
| rs73049928 | A | G | -0.2382 | -0.0533 | 0.1939 | 0.019 | 0.005065 | 0.0392 | 757601 | 1.20E-09 |
| rs7306710 | T | C | -0.2429 | -0.013 | 0.519 | 0.0146 | 0.3722 | 0.0303 | 757601 | 1.03E-15 |
| rs73075659 | A | G | 0.3962 | 0.0165 | 0.3346 | 0.0154 | 0.2841 | 0.0321 | 757601 | 5.52E-35 |
| rs7331680 | T | G | 0.4101 | -0.0097 | 0.8509 | 0.0201 | 0.6299 | 0.0423 | 757601 | 3.35E-22 |
| rs73727605 | A | G | 0.3616 | -0.0136 | 0.9337 | 0.0311 | 0.6627 | 0.0623 | 757601 | 6.60E-09 |
| rs73855810 | A | G | 0.2732 | -0.0297 | 0.8594 | 0.0203 | 0.1436 | 0.0434 | 757601 | 3.04E-10 |
| rs7395791 | A | G | -0.2162 | -0.0052 | 0.5581 | 0.0146 | 0.722 | 0.0308 | 757601 | 2.19E-12 |
| rs74048190 | T | C | -0.4404 | -0.022 | 0.0478 | 0.0371 | 0.5528 | 0.0757 | 757601 | 6.07E-09 |
| rs743395 | T | C | 0.2597 | -0.0226 | 0.6166 | 0.0151 | 0.1357 | 0.0317 | 757601 | 2.55E-16 |
| rs7439567 | T | C | 0.2537 | -0.024 | 0.5894 | 0.0145 | 0.09778 | 0.0309 | 757601 | 2.31E-16 |
| rs7491248 | A | G | 0.2163 | -0.0103 | 0.7761 | 0.017 | 0.5429 | 0.0362 | 757601 | 2.38E-09 |
| rs75016974 | T | C | -0.2513 | -0.012 | 0.8577 | 0.0215 | 0.5751 | 0.0439 | 757601 | 1.05E-08 |
| rs7514579 | A | C | 0.2243 | -0.0306 | 0.2288 | 0.0174 | 0.07935 | 0.0361 | 757601 | 5.45E-10 |
| rs75461554 | T | C | -0.3016 | 0.0092 | 0.7993 | 0.0176 | 0.6002 | 0.0377 | 757601 | 1.18E-15 |
| rs75672964 | T | C | 0.5885 | 0.0593 | 0.9582 | 0.0464 | 0.2011 | 0.0839 | 757601 | 2.35E-12 |
| rs75961402 | A | G | 0.2659 | 0.0022 | 0.8466 | 0.0198 | 0.9101 | 0.0418 | 757601 | 1.95E-10 |
| rs7615099 | A | G | 0.1891 | 0.0011 | 0.3325 | 0.0153 | 0.9411 | 0.0321 | 757601 | 3.90E-09 |
| rs76452347 | T | C | -0.2974 | -0.0019 | 0.795 | 0.0199 | 0.9252 | 0.0397 | 757601 | 7.13E-14 |
| rs76719272 | T | C | -0.2738 | -0.0569 | 0.8688 | 0.023 | 0.0133 | 0.0461 | 757601 | 2.97E-09 |
| rs7683728 | T | C | -0.3654 | 0.0337 | 0.4688 | 0.0142 | 0.01791 | 0.0304 | 757601 | 2.43E-33 |
| rs77032376 | T | C | -0.2727 | -0.0057 | 0.8515 | 0.021 | 0.7855 | 0.043 | 757601 | 2.35E-10 |
| rs7703560 | A | G | -0.2246 | -0.0035 | 0.2998 | 0.0157 | 0.8249 | 0.0333 | 757601 | 1.51E-11 |
| rs7725413 | T | C | -0.1985 | 0.024 | 0.2301 | 0.0171 | 0.16 | 0.0359 | 757601 | 3.07E-08 |
| rs77375686 | A | G | -0.3467 | 0.0146 | 0.1117 | 0.0228 | 0.5212 | 0.0485 | 757601 | 8.38E-13 |
| rs7744902 | A | G | -0.4088 | -0.0241 | 0.9234 | 0.0281 | 0.3906 | 0.0593 | 757601 | 5.64E-12 |
| rs7763558 | A | G | 0.3363 | 0.0038 | 0.6759 | 0.0151 | 0.8033 | 0.0321 | 757601 | 1.17E-25 |
| rs7765526 | A | G | 0.201 | -0.0152 | 0.5367 | 0.0148 | 0.3021 | 0.0307 | 757601 | 5.88E-11 |
| rs778124 | A | G | 0.2965 | 0.0042 | 0.6264 | 0.0147 | 0.7765 | 0.0311 | 757601 | 1.45E-21 |
| rs77924615 | A | G | -0.4081 | -0.0131 | 0.8014 | 0.0189 | 0.4878 | 0.039 | 757601 | 1.12E-25 |
| rs7821832 | T | G | 0.4222 | 0.0135 | 0.2553 | 0.0163 | 0.4076 | 0.0348 | 757601 | 6.67E-34 |
| rs7830607 | A | G | -0.206 | 0.0276 | 0.6954 | 0.0156 | 0.07706 | 0.0327 | 757601 | 3.09E-10 |
| rs78474310 | A | G | -0.4699 | -0.0042 | 0.0448 | 0.0371 | 0.909 | 0.0734 | 757601 | 1.51E-10 |
| rs7854147 | A | G | 0.3056 | 0.0019 | 0.123 | 0.0227 | 0.932 | 0.0461 | 757601 | 3.29E-11 |
| rs78648104 | T | C | -0.4287 | 0.035 | 0.0925 | 0.0265 | 0.1866 | 0.0541 | 757601 | 2.37E-15 |
| rs786923 | T | C | -0.3082 | 0.0031 | 0.3761 | 0.0146 | 0.8332 | 0.031 | 757601 | 2.83E-23 |
| rs79069610 | T | C | -0.4005 | 0.0132 | 0.05 | 0.0339 | 0.6972 | 0.0727 | 757601 | 3.68E-08 |
| rs7912283 | A | G | -0.2144 | -0.0108 | 0.3532 | 0.0157 | 0.4911 | 0.0322 | 757601 | 2.94E-11 |
| rs7926110 | T | G | 0.2603 | -0.0037 | 0.3267 | 0.0152 | 0.8072 | 0.0321 | 757601 | 5.71E-16 |
| rs7926335 | T | C | 0.3135 | 0.0211 | 0.7309 | 0.0161 | 0.1892 | 0.0339 | 757601 | 2.52E-20 |
| rs7927515 | A | C | 0.2271 | -0.0074 | 0.6541 | 0.0149 | 0.6186 | 0.0319 | 757601 | 1.05E-12 |
| rs79384779 | T | C | 0.3179 | -0.0179 | 0.8488 | 0.0206 | 0.3844 | 0.0428 | 757601 | 1.08E-13 |
| rs7944927 | T | C | 0.2235 | -0.0131 | 0.2181 | 0.02 | 0.5106 | 0.0392 | 757601 | 1.23E-08 |
| rs79539362 | T | C | 0.4003 | 0.0104 | 0.1008 | 0.0244 | 0.6691 | 0.0504 | 757601 | 2.09E-15 |
| rs7963801 | T | C | -0.2362 | 0.0142 | 0.5779 | 0.015 | 0.3441 | 0.0311 | 757601 | 2.87E-14 |
| rs79782817 | T | G | 0.5324 | -0.0208 | 0.8973 | 0.0232 | 0.3698 | 0.0499 | 757601 | 1.43E-26 |
| rs8044992 | T | C | 0.2138 | -0.0016 | 0.2877 | 0.0157 | 0.9194 | 0.0331 | 757601 | 1.07E-10 |
| rs8125763 | A | C | 0.1761 | -0.0355 | 0.5283 | 0.0143 | 0.01268 | 0.0301 | 757601 | 4.84E-09 |
| rs8142376 | T | C | 0.1676 | -0.0059 | 0.509 | 0.0142 | 0.6804 | 0.03 | 757601 | 2.20E-08 |
| rs8180684 | T | C | 0.2134 | -0.0062 | 0.7104 | 0.0159 | 0.6969 | 0.0335 | 757601 | 1.80E-10 |
| rs843093 | A | G | -0.2085 | -0.0241 | 0.2912 | 0.0166 | 0.1447 | 0.0338 | 757601 | 6.95E-10 |
| rs848445 | T | C | -0.2025 | 0.0193 | 0.7149 | 0.0162 | 0.2354 | 0.0339 | 757601 | 2.28E-09 |
| rs869396 | A | C | -0.2115 | 0.0011 | 0.5341 | 0.0145 | 0.9381 | 0.0305 | 757601 | 4.12E-12 |
| rs871004 | A | G | 0.2336 | 0.0081 | 0.6519 | 0.0149 | 0.5848 | 0.0317 | 757601 | 1.65E-13 |
| rs8904 | A | G | 0.3061 | 0.0209 | 0.6322 | 0.0149 | 0.1608 | 0.0314 | 757601 | 1.71E-22 |
| rs908951 | T | C | -0.2261 | 0.0161 | 0.5622 | 0.0154 | 0.2956 | 0.0315 | 757601 | 7.14E-13 |
| rs927315 | T | C | 0.1689 | -0.011 | 0.5287 | 0.0152 | 0.4686 | 0.0303 | 757601 | 2.44E-08 |
| rs9302885 | A | G | 0.2242 | 0.0102 | 0.5548 | 0.0144 | 0.4786 | 0.0302 | 757601 | 1.03E-13 |
| rs9303175 | T | G | -0.2048 | -0.0044 | 0.6537 | 0.0159 | 0.783 | 0.0327 | 757601 | 3.65E-10 |
| rs9349379 | A | G | 0.2664 | -0.0067 | 0.407 | 0.0148 | 0.6496 | 0.0312 | 757601 | 1.31E-17 |
| rs9361836 | T | C | 0.2196 | 0.0045 | 0.6828 | 0.0152 | 0.7652 | 0.0324 | 757601 | 1.25E-11 |
| rs9368222 | A | C | 0.2281 | -0.0105 | 0.7312 | 0.016 | 0.5103 | 0.0339 | 757601 | 1.84E-11 |
| rs9401913 | A | G | 0.5202 | 0.0072 | 0.5613 | 0.0146 | 0.6225 | 0.0305 | 757601 | 3.66E-65 |
| rs9486916 | T | C | 0.2657 | -0.0254 | 0.8021 | 0.0181 | 0.1595 | 0.0385 | 757601 | 5.42E-12 |
| rs9507885 | T | C | -0.3208 | 2.00E-04 | 0.9047 | 0.0266 | 0.9935 | 0.0542 | 757601 | 3.23E-09 |
| rs9508495 | T | C | -0.3557 | 0.0032 | 0.2435 | 0.0168 | 0.849 | 0.0353 | 757601 | 6.34E-24 |
| rs9526707 | A | G | -0.2039 | -0.0128 | 0.6784 | 0.0155 | 0.4087 | 0.0323 | 757601 | 2.77E-10 |
| rs9549627 | A | G | 0.2846 | -0.0027 | 0.8825 | 0.026 | 0.9169 | 0.05 | 757601 | 1.25E-08 |
| rs9651825 | A | G | -0.2042 | -0.0126 | 0.2705 | 0.0164 | 0.4408 | 0.034 | 757601 | 1.93E-09 |
| rs977184 | T | C | -0.184 | -0.0059 | 0.3748 | 0.0149 | 0.6922 | 0.0314 | 757601 | 4.86E-09 |
| rs9869437 | A | C | -0.2001 | -0.0301 | 0.6477 | 0.0153 | 0.04961 | 0.0318 | 757601 | 3.22E-10 |
| rs9876694 | T | C | 0.4713 | 0.0021 | 0.9416 | 0.0314 | 0.9467 | 0.0651 | 757601 | 4.64E-13 |
| rs9880098 | A | G | 0.3081 | 0.0188 | 0.6054 | 0.0145 | 0.1947 | 0.0308 | 757601 | 1.59E-23 |
| rs9886665 | T | C | 0.2048 | 0.0274 | 0.7329 | 0.0171 | 0.1088 | 0.0343 | 757601 | 2.47E-09 |
| rs9897429 | A | G | 0.2645 | 0.0313 | 0.48 | 0.0166 | 0.05913 | 0.0319 | 757601 | 1.19E-16 |
| rs9918879 | T | G | -0.2984 | 0.0381 | 0.897 | 0.0242 | 0.1157 | 0.0499 | 757601 | 2.28E-09 |

**Additional file 5 Genome-wide significant and independent SNPs that were used as instruments for DBP**

| SNP | effect_allele | other_allele | beta.exposure | beta.outcome | eaf | se.outcome | pval.outcome | se.exposure | samplesize | pval.exposure |
| --- | --- | --- | --- | --- | --- | --- | --- | --- | --- | --- |
| rs10054208 | T | C | 0.1187 | -0.0022 | 0.6383 | 0.0159 | 0.8882 | 0.0185 | 757601 | 1.49E-10 |
| rs10062049 | T | C | 0.2208 | -0.0418 | 0.8641 | 0.0209 | 0.04562 | 0.0255 | 757601 | 4.50E-18 |
| rs1006545 | T | G | 0.3633 | 0.0045 | 0.1125 | 0.0227 | 0.842 | 0.0275 | 757601 | 7.96E-40 |
| rs10069690 | T | C | 0.1615 | -0.0322 | 0.7419 | 0.0215 | 0.1336 | 0.021 | 757601 | 1.42E-14 |
| rs10087280 | A | G | 0.1381 | -0.0097 | 0.1683 | 0.0185 | 0.6004 | 0.0232 | 757601 | 2.54E-09 |
| rs10164193 | T | G | -0.2196 | 0.018 | 0.0777 | 0.0266 | 0.4977 | 0.0327 | 757601 | 1.87E-11 |
| rs1035673 | T | C | 0.1625 | -0.0107 | 0.6032 | 0.0146 | 0.4631 | 0.0176 | 757601 | 3.00E-20 |
| rs1039897 | A | G | -0.1085 | -9.00E-04 | 0.3497 | 0.0152 | 0.9511 | 0.0183 | 757601 | 3.26E-09 |
| rs10424224 | T | C | 0.1042 | 0.0219 | 0.6416 | 0.0149 | 0.1418 | 0.0182 | 757601 | 1.05E-08 |
| rs1043809 | T | C | 0.159 | -0.003 | 0.1917 | 0.0184 | 0.8713 | 0.0223 | 757601 | 9.77E-13 |
| rs1044822 | T | C | -0.1334 | 0.0304 | 0.8512 | 0.0202 | 0.1321 | 0.0243 | 757601 | 4.14E-08 |
| rs10490923 | A | G | 0.1533 | 0.0683 | 0.8743 | 0.021 | 0.001147 | 0.0262 | 757601 | 5.02E-09 |
| rs10493408 | A | C | 0.1584 | -0.0346 | 0.8669 | 0.0207 | 0.09511 | 0.0255 | 757601 | 5.09E-10 |
| rs10500932 | A | G | 0.2784 | -0.0417 | 0.9257 | 0.0266 | 0.1172 | 0.0333 | 757601 | 5.79E-17 |
| rs10759697 | A | G | 0.1308 | -0.0323 | 0.5094 | 0.0142 | 0.02272 | 0.0173 | 757601 | 3.94E-14 |
| rs10776752 | T | G | 0.4573 | -0.0169 | 0.9195 | 0.0284 | 0.5519 | 0.033 | 757601 | 1.25E-43 |
| rs1077795 | A | G | 0.1987 | -0.0135 | 0.2611 | 0.0165 | 0.412 | 0.0199 | 757601 | 1.62E-23 |
| rs10804330 | T | C | 0.1331 | 0.0073 | 0.4329 | 0.0145 | 0.6139 | 0.0176 | 757601 | 4.60E-14 |
| rs10832586 | A | C | -0.3083 | 0.0287 | 0.2016 | 0.0179 | 0.1091 | 0.0216 | 757601 | 2.53E-46 |
| rs10838702 | T | G | 0.2375 | 0.0783 | 0.6125 | 0.0145 | 6.68E-08 | 0.0178 | 757601 | 1.27E-40 |
| rs10873612 | T | C | -0.1096 | 0.0172 | 0.4039 | 0.0155 | 0.267 | 0.0179 | 757601 | 9.51E-10 |
| rs10941043 | T | G | -0.1269 | 0.0059 | 0.2906 | 0.0157 | 0.7062 | 0.019 | 757601 | 2.52E-11 |
| rs10980408 | T | C | -0.3745 | -0.0382 | 0.0358 | 0.0383 | 0.319 | 0.0477 | 757601 | 4.17E-15 |
| rs11040503 | A | C | -0.17 | 0.0362 | 0.8143 | 0.0202 | 0.07353 | 0.0236 | 757601 | 5.65E-13 |
| rs11070245 | T | G | -0.1287 | 0.0046 | 0.5321 | 0.0143 | 0.7479 | 0.0174 | 757601 | 1.57E-13 |
| rs11077961 | A | G | 0.1073 | -0.011 | 0.3676 | 0.016 | 0.4912 | 0.0186 | 757601 | 8.55E-09 |
| rs11108209 | T | C | -0.1901 | 0.048 | 0.0932 | 0.025 | 0.05493 | 0.03 | 757601 | 2.40E-10 |
| rs11141731 | T | C | -0.1258 | -0.0244 | 0.772 | 0.0175 | 0.1639 | 0.0207 | 757601 | 1.31E-09 |
| rs1114347 | A | G | -0.1792 | 0.0196 | 0.4823 | 0.0143 | 0.1712 | 0.0173 | 757601 | 3.32E-25 |
| rs11145807 | A | G | 0.155 | -0.0019 | 0.5942 | 0.0154 | 0.9002 | 0.0184 | 757601 | 4.10E-17 |
| rs11153730 | T | C | 0.1551 | -0.0278 | 0.4906 | 0.0142 | 0.05006 | 0.0173 | 757601 | 2.57E-19 |
| rs11228613 | T | G | 0.1741 | 0.0064 | 0.2163 | 0.0173 | 0.7112 | 0.0212 | 757601 | 2.10E-16 |
| rs11252324 | T | G | -0.2339 | 0.0238 | 0.923 | 0.0259 | 0.3568 | 0.0328 | 757601 | 1.03E-12 |
| rs1133400 | A | G | -0.1318 | -0.0456 | 0.2148 | 0.0178 | 0.01049 | 0.0215 | 757601 | 8.30E-10 |
| rs114503346 | T | C | -0.2678 | -0.0026 | 0.9539 | 0.0395 | 0.9469 | 0.0426 | 757601 | 3.10E-10 |
| rs115447786 | T | C | 0.2904 | -0.1222 | 0.9573 | 0.0438 | 0.005284 | 0.0455 | 757601 | 1.75E-10 |
| rs11556924 | T | C | -0.181 | -0.0022 | 0.6173 | 0.0159 | 0.8885 | 0.0181 | 757601 | 1.83E-23 |
| rs11592107 | A | G | 0.1203 | 0.0098 | 0.6906 | 0.0154 | 0.5265 | 0.0187 | 757601 | 1.23E-10 |
| rs116063464 | A | G | 0.2017 | -0.0245 | 0.9399 | 0.0308 | 0.426 | 0.0369 | 757601 | 4.68E-08 |
| rs11636952 | T | C | 0.3997 | -0.0212 | 0.6869 | 0.0153 | 0.1673 | 0.0189 | 757601 | 5.21E-99 |
| rs11661473 | A | G | 0.2007 | -7.00E-04 | 0.7317 | 0.0161 | 0.9657 | 0.0196 | 757601 | 1.54E-24 |
| rs11684340 | A | C | 0.1249 | 0.0054 | 0.2176 | 0.0176 | 0.7576 | 0.021 | 757601 | 2.75E-09 |
| rs11687089 | T | C | 0.1739 | 0.0104 | 0.4171 | 0.0145 | 0.47 | 0.0175 | 757601 | 2.79E-23 |
| rs11692619 | T | C | -0.1281 | 0.0164 | 0.6393 | 0.0154 | 0.2854 | 0.0184 | 757601 | 3.31E-12 |
| rs11721984 | T | C | -0.1409 | 0.0062 | 0.5468 | 0.0147 | 0.6732 | 0.0177 | 757601 | 1.89E-15 |
| rs11778153 | T | C | 0.1192 | 0.016 | 0.3569 | 0.015 | 0.2871 | 0.0182 | 757601 | 5.84E-11 |
| rs1178979 | T | C | 0.1504 | 0.0065 | 0.1953 | 0.0183 | 0.7201 | 0.0221 | 757601 | 9.96E-12 |
| rs11859505 | A | G | -0.1037 | 0.0061 | 0.5805 | 0.015 | 0.6815 | 0.0181 | 757601 | 9.76E-09 |
| rs11923343 | A | G | -0.1138 | 0.0153 | 0.6396 | 0.0146 | 0.2972 | 0.0181 | 757601 | 3.10E-10 |
| rs11945489 | T | C | -0.1392 | 0.0031 | 0.7091 | 0.0158 | 0.8421 | 0.0192 | 757601 | 3.99E-13 |
| rs11960210 | T | C | 0.2474 | 0.0148 | 0.3751 | 0.0145 | 0.3061 | 0.018 | 757601 | 3.36E-43 |
| rs11961593 | T | C | -0.3158 | -0.0297 | 0.9315 | 0.0282 | 0.2917 | 0.0349 | 757601 | 1.49E-19 |
| rs12088448 | A | C | -0.1544 | 0.0093 | 0.356 | 0.0154 | 0.5472 | 0.0182 | 757601 | 2.53E-17 |
| rs12148044 | A | G | 0.1371 | 0.0225 | 0.8266 | 0.0187 | 0.2292 | 0.023 | 757601 | 2.66E-09 |
| rs12152463 | T | C | 0.1006 | 0.0038 | 0.5749 | 0.0145 | 0.7939 | 0.0174 | 757601 | 8.02E-09 |
| rs1215469 | A | C | -0.1383 | 0.0028 | 0.7705 | 0.0175 | 0.8743 | 0.0211 | 757601 | 5.23E-11 |
| rs12216886 | T | G | 0.1292 | 0.0058 | 0.1923 | 0.0188 | 0.7584 | 0.0221 | 757601 | 4.76E-09 |
| rs12229480 | T | C | 0.1359 | 0.0295 | 0.2775 | 0.0159 | 0.06328 | 0.0193 | 757601 | 2.11E-12 |
| rs12247028 | A | G | -0.1396 | 0.003 | 0.3678 | 0.0154 | 0.8433 | 0.0188 | 757601 | 1.18E-13 |
| rs12337056 | T | C | 0.1364 | 0.0204 | 0.8239 | 0.0201 | 0.3112 | 0.0228 | 757601 | 2.18E-09 |
| rs12405515 | T | G | -0.1698 | -8.00E-04 | 0.4298 | 0.0144 | 0.9538 | 0.0174 | 757601 | 1.92E-22 |
| rs1243876 | T | C | -0.1063 | 0.0028 | 0.2988 | 0.0156 | 0.8579 | 0.019 | 757601 | 2.14E-08 |
| rs12444212 | T | C | 0.1291 | 0.0122 | 0.1826 | 0.0193 | 0.5277 | 0.0226 | 757601 | 1.06E-08 |
| rs12446456 | T | C | -0.181 | -0.0377 | 0.5727 | 0.0144 | 0.008659 | 0.0175 | 757601 | 3.99E-25 |
| rs12503341 | A | G | -0.2993 | 0.0356 | 0.9606 | 0.0352 | 0.3123 | 0.0462 | 757601 | 9.43E-11 |
| rs12509595 | T | C | -0.4972 | 0.0216 | 0.2924 | 0.016 | 0.1766 | 0.0192 | 757601 | 1.58E-148 |
| rs12515541 | T | G | 0.1156 | 0.0128 | 0.3928 | 0.0146 | 0.3832 | 0.0177 | 757601 | 6.23E-11 |
| rs12574332 | T | C | 0.2072 | 0.0427 | 0.8773 | 0.0225 | 0.05811 | 0.0266 | 757601 | 6.14E-15 |
| rs12596630 | T | C | 0.2606 | -0.021 | 0.9095 | 0.0259 | 0.4174 | 0.0314 | 757601 | 1.03E-16 |
| rs12601936 | A | G | -0.1429 | 0.028 | 0.6107 | 0.0146 | 0.05592 | 0.0178 | 757601 | 1.07E-15 |
| rs1263671 | T | C | -0.1394 | -5.00E-04 | 0.1632 | 0.02 | 0.9804 | 0.0238 | 757601 | 4.69E-09 |
| rs1265842 | T | C | 0.1113 | -0.0288 | 0.5166 | 0.0145 | 0.04639 | 0.0174 | 757601 | 1.70E-10 |
| rs12693302 | A | G | -0.2378 | 0.0095 | 0.3482 | 0.015 | 0.5253 | 0.0181 | 757601 | 2.16E-39 |
| rs12728150 | A | G | -0.2045 | -0.0309 | 0.081 | 0.0263 | 0.24 | 0.0318 | 757601 | 1.28E-10 |
| rs1275988 | T | C | -0.2945 | -0.0144 | 0.3889 | 0.0147 | 0.3281 | 0.0177 | 757601 | 1.92E-62 |
| rs12790943 | T | C | -0.1002 | -0.0189 | 0.5787 | 0.0145 | 0.1911 | 0.0175 | 757601 | 1.14E-08 |
| rs12866098 | A | G | 0.1033 | -0.0127 | 0.6577 | 0.0154 | 0.4103 | 0.0186 | 757601 | 2.73E-08 |
| rs12906962 | T | C | -0.2378 | 0.005 | 0.3233 | 0.0156 | 0.7485 | 0.0188 | 757601 | 8.73E-37 |
| rs12919839 | T | C | -0.1098 | 0.0016 | 0.7159 | 0.0158 | 0.9186 | 0.0192 | 757601 | 1.04E-08 |
| rs12929303 | A | G | 0.1572 | -0.0043 | 0.4675 | 0.0143 | 0.7644 | 0.0174 | 757601 | 1.58E-19 |
| rs12990959 | T | C | -0.1271 | -0.0191 | 0.3125 | 0.0154 | 0.2135 | 0.0187 | 757601 | 1.11E-11 |
| rs13001283 | A | G | 0.1522 | -0.0483 | 0.8404 | 0.0204 | 0.01772 | 0.0239 | 757601 | 1.92E-10 |
| rs13042148 | T | C | -0.1674 | -0.0175 | 0.8463 | 0.0208 | 0.3999 | 0.0244 | 757601 | 7.24E-12 |
| rs13107325 | T | C | -0.6747 | 0.0202 | 0.9258 | 0.0273 | 0.4607 | 0.0339 | 757601 | 3.72E-88 |
| rs13118687 | A | G | -0.1496 | -0.0212 | 0.5298 | 0.0146 | 0.1466 | 0.0175 | 757601 | 1.37E-17 |
| rs13124515 | T | C | -0.1052 | -0.0072 | 0.6869 | 0.0154 | 0.6387 | 0.0187 | 757601 | 1.98E-08 |
| rs13139571 | A | C | -0.2408 | -0.0127 | 0.7634 | 0.0165 | 0.4423 | 0.0203 | 757601 | 2.29E-32 |
| rs13152154 | T | C | -0.1186 | -0.0082 | 0.2707 | 0.0161 | 0.6091 | 0.0195 | 757601 | 1.23E-09 |
| rs13215166 | A | G | -0.3094 | -0.0032 | 0.4415 | 0.0143 | 0.8227 | 0.0174 | 757601 | 1.79E-70 |
| rs1322639 | A | G | -0.1584 | -0.0126 | 0.2234 | 0.0175 | 0.4731 | 0.0209 | 757601 | 3.87E-14 |
| rs13237249 | T | C | 0.1366 | 0.0266 | 0.602 | 0.0148 | 0.07244 | 0.0177 | 757601 | 1.03E-14 |
| rs13240040 | A | G | 0.1186 | 0.0034 | 0.3164 | 0.0159 | 0.8316 | 0.019 | 757601 | 3.98E-10 |
| rs1327235 | A | G | -0.3018 | 0.0017 | 0.4714 | 0.0143 | 0.9031 | 0.0173 | 757601 | 4.76E-68 |
| rs13355146 | T | C | 0.1224 | 0.0115 | 0.6168 | 0.0148 | 0.4366 | 0.0178 | 757601 | 6.39E-12 |
| rs13358657 | A | G | -0.224 | -0.0274 | 0.1332 | 0.0213 | 0.1986 | 0.0255 | 757601 | 1.70E-18 |
| rs134041 | T | C | 0.1223 | -0.0023 | 0.564 | 0.0144 | 0.8731 | 0.0175 | 757601 | 3.05E-12 |
| rs138420351 | T | C | 0.5568 | -0.1362 | 0.984 | 0.0715 | 0.05678 | 0.0854 | 757601 | 7.11E-11 |
| rs142449193 | T | C | -0.2573 | -0.0135 | 0.954 | 0.0339 | 0.6911 | 0.0426 | 757601 | 1.51E-09 |
| rs1425486 | T | C | -0.1331 | 0.0159 | 0.6793 | 0.0153 | 0.3012 | 0.0187 | 757601 | 1.11E-12 |
| rs1436138 | A | G | 0.1991 | -0.016 | 0.3633 | 0.0151 | 0.2885 | 0.0182 | 757601 | 7.33E-28 |
| rs147081004 | A | C | 0.1411 | 0.0072 | 0.1444 | 0.0217 | 0.7395 | 0.0257 | 757601 | 4.09E-08 |
| rs148401029 | A | C | -0.3122 | 0.0369 | 0.9648 | 0.0389 | 0.3439 | 0.0486 | 757601 | 1.32E-10 |
| rs1502358 | A | G | -0.1127 | 0.0022 | 0.3187 | 0.0152 | 0.8862 | 0.0185 | 757601 | 1.13E-09 |
| rs150816167 | T | C | -0.2873 | -0.0093 | 0.0451 | 0.0389 | 0.8108 | 0.0446 | 757601 | 1.17E-10 |
| rs1518460 | A | G | 0.1342 | 0.0176 | 0.2918 | 0.0157 | 0.2626 | 0.0189 | 757601 | 1.26E-12 |
| rs1582931 | A | G | 0.2161 | 0.0241 | 0.5252 | 0.0143 | 0.09116 | 0.0175 | 757601 | 4.51E-35 |
| rs1623474 | T | C | 0.2234 | -0.0203 | 0.67 | 0.0151 | 0.1788 | 0.0184 | 757601 | 6.24E-34 |
| rs1669907 | T | G | 0.1158 | -0.0205 | 0.6968 | 0.0162 | 0.2057 | 0.0191 | 757601 | 1.36E-09 |
| rs167479 | T | G | -0.362 | 0.0159 | 0.5278 | 0.0222 | 0.4738 | 0.0188 | 757601 | 1.67E-82 |
| rs1675383 | A | C | 0.1488 | -0.0177 | 0.5569 | 0.0144 | 0.2182 | 0.0174 | 757601 | 1.47E-17 |
| rs16853198 | A | G | 0.3386 | 0.0042 | 0.0762 | 0.0259 | 0.8723 | 0.0327 | 757601 | 4.44E-25 |
| rs1687295 | T | C | 0.2061 | -0.0065 | 0.7296 | 0.016 | 0.6832 | 0.0194 | 757601 | 2.99E-26 |
| rs16875357 | T | G | -0.1205 | 0.0243 | 0.2431 | 0.0167 | 0.1467 | 0.0203 | 757601 | 2.70E-09 |
| rs17321041 | T | C | 0.2313 | -0.0561 | 0.9367 | 0.0311 | 0.07142 | 0.0363 | 757601 | 1.78E-10 |
| rs17396055 | A | G | -0.115 | -0.0078 | 0.6676 | 0.0152 | 0.6092 | 0.0184 | 757601 | 4.13E-10 |
| rs17432462 | T | C | -0.1036 | 0.0094 | 0.3766 | 0.0148 | 0.5226 | 0.0179 | 757601 | 7.31E-09 |
| rs1745417 | T | C | 0.1708 | 0.0134 | 0.4807 | 0.0143 | 0.3492 | 0.0173 | 757601 | 4.69E-23 |
| rs17454517 | A | G | 0.1216 | -0.0016 | 0.5064 | 0.0143 | 0.9104 | 0.0174 | 757601 | 2.65E-12 |
| rs17677603 | A | G | -0.2 | -0.0102 | 0.3837 | 0.0148 | 0.4927 | 0.0178 | 757601 | 3.90E-29 |
| rs17678552 | T | C | -0.1649 | -0.0099 | 0.3439 | 0.0152 | 0.5167 | 0.0182 | 757601 | 1.33E-19 |
| rs17832905 | A | C | 0.1923 | -0.0354 | 0.9283 | 0.0288 | 0.2188 | 0.0346 | 757601 | 2.81E-08 |
| rs17880989 | A | G | 0.4014 | -0.0882 | 0.9741 | 0.0536 | 0.09945 | 0.0591 | 757601 | 1.11E-11 |
| rs1790123 | T | C | 0.1991 | 0.0297 | 0.1968 | 0.0178 | 0.09487 | 0.0218 | 757601 | 6.87E-20 |
| rs1819663 | A | G | 0.1147 | 0.0095 | 0.4929 | 0.0143 | 0.5067 | 0.0174 | 757601 | 4.63E-11 |
| rs1848510 | A | G | 0.1256 | 0.0093 | 0.6377 | 0.0148 | 0.533 | 0.0181 | 757601 | 4.10E-12 |
| rs1867624 | T | C | 0.1412 | 0.0125 | 0.3853 | 0.0147 | 0.3924 | 0.0178 | 757601 | 2.08E-15 |
| rs1871190 | T | G | 0.1078 | -0.0033 | 0.6656 | 0.0153 | 0.8282 | 0.0186 | 757601 | 6.63E-09 |
| rs1876490 | A | G | 0.1364 | -0.0133 | 0.2833 | 0.0159 | 0.4005 | 0.0192 | 757601 | 1.16E-12 |
| rs1882961 | T | C | 0.1272 | 0.0045 | 0.6912 | 0.0156 | 0.7731 | 0.0188 | 757601 | 1.40E-11 |
| rs1889785 | A | G | 0.1255 | -0.0083 | 0.5449 | 0.0143 | 0.5624 | 0.0174 | 757601 | 5.61E-13 |
| rs1903752 | T | C | -0.0987 | 0.0149 | 0.4614 | 0.015 | 0.3191 | 0.0178 | 757601 | 3.20E-08 |
| rs1906672 | A | G | 0.1402 | -0.0097 | 0.7676 | 0.0172 | 0.5745 | 0.0205 | 757601 | 8.48E-12 |
| rs1950500 | T | C | 0.1396 | 0.0084 | 0.7081 | 0.0157 | 0.5908 | 0.019 | 757601 | 2.20E-13 |
| rs1984195 | A | G | 0.1736 | 0.0194 | 0.5117 | 0.0142 | 0.1728 | 0.0173 | 757601 | 1.43E-23 |
| rs198851 | T | G | 0.3889 | -0.0385 | 0.8504 | 0.0198 | 0.0524 | 0.0244 | 757601 | 2.93E-57 |
| rs2009733 | A | G | 0.1217 | 0.0112 | 0.5005 | 0.0151 | 0.4571 | 0.0176 | 757601 | 5.10E-12 |
| rs2133386 | A | C | -0.1322 | 0.009 | 0.5673 | 0.0145 | 0.5337 | 0.0176 | 757601 | 5.21E-14 |
| rs2146315 | T | C | -0.1197 | 0.0295 | 0.7682 | 0.0171 | 0.0851 | 0.0205 | 757601 | 5.03E-09 |
| rs2191046 | T | G | 0.1184 | -0.0137 | 0.2646 | 0.0166 | 0.4099 | 0.0197 | 757601 | 1.78E-09 |
| rs2236295 | T | G | -0.207 | 0.0301 | 0.6008 | 0.0148 | 0.04159 | 0.0177 | 757601 | 1.42E-31 |
| rs2239268 | A | G | 0.1097 | -0.0149 | 0.2995 | 0.0154 | 0.3316 | 0.019 | 757601 | 7.40E-09 |
| rs2239917 | T | C | 0.1731 | 0.0015 | 0.5748 | 0.0146 | 0.9177 | 0.0176 | 757601 | 9.69E-23 |
| rs2271139 | A | C | -0.1247 | 5.00E-04 | 0.714 | 0.016 | 0.9764 | 0.0192 | 757601 | 8.23E-11 |
| rs2273654 | T | C | 0.1165 | 0.0443 | 0.4392 | 0.0144 | 0.002111 | 0.0175 | 757601 | 2.75E-11 |
| rs227426 | T | G | 0.1119 | -0.0102 | 0.4381 | 0.0143 | 0.4769 | 0.0175 | 757601 | 1.75E-10 |
| rs2306363 | T | G | -0.2643 | 0.0109 | 0.7952 | 0.0179 | 0.5412 | 0.0216 | 757601 | 1.63E-34 |
| rs2307111 | T | C | -0.1742 | -0.005 | 0.3966 | 0.0145 | 0.7292 | 0.0178 | 757601 | 1.62E-22 |
| rs234623 | A | G | -0.1191 | 0.0128 | 0.4959 | 0.0145 | 0.3768 | 0.0174 | 757601 | 8.56E-12 |
| rs2376997 | A | C | -0.1389 | -0.0124 | 0.7511 | 0.0164 | 0.4511 | 0.0218 | 757601 | 1.94E-10 |
| rs2397060 | T | C | -0.161 | 0.0289 | 0.1405 | 0.0201 | 0.1508 | 0.0251 | 757601 | 1.46E-10 |
| rs2421200 | T | G | -0.1097 | 0.0067 | 0.5118 | 0.0145 | 0.6442 | 0.0173 | 757601 | 2.59E-10 |
| rs2442618 | T | C | -0.1315 | -0.0028 | 0.4277 | 0.0151 | 0.8539 | 0.0177 | 757601 | 1.21E-13 |
| rs2444769 | A | C | 0.158 | -0.0059 | 0.2051 | 0.0178 | 0.7396 | 0.0219 | 757601 | 4.85E-13 |
| rs2469141 | T | C | 0.1351 | -0.0273 | 0.1628 | 0.0192 | 0.1545 | 0.0238 | 757601 | 1.39E-08 |
| rs2484294 | A | G | 0.3165 | 0.0051 | 0.2673 | 0.016 | 0.7512 | 0.0196 | 757601 | 1.17E-58 |
| rs2487926 | A | G | 0.0972 | 0.0161 | 0.4295 | 0.0146 | 0.2701 | 0.0176 | 757601 | 3.31E-08 |
| rs2493296 | T | C | 0.2496 | -0.0254 | 0.8581 | 0.0206 | 0.2172 | 0.0254 | 757601 | 7.45E-23 |
| rs2548459 | T | C | -0.132 | -0.0212 | 0.5195 | 0.0147 | 0.149 | 0.0176 | 757601 | 5.95E-14 |
| rs2569882 | T | C | 0.1199 | -0.0067 | 0.4342 | 0.0162 | 0.6796 | 0.0182 | 757601 | 4.28E-11 |
| rs2586970 | A | G | -0.1493 | -0.0266 | 0.5639 | 0.0143 | 0.0626 | 0.0175 | 757601 | 1.56E-17 |
| rs2589218 | T | C | -0.1207 | -0.0101 | 0.2698 | 0.0161 | 0.5293 | 0.0196 | 757601 | 6.90E-10 |
| rs2598 | A | G | 0.1387 | -0.012 | 0.4674 | 0.0144 | 0.4048 | 0.0175 | 757601 | 1.94E-15 |
| rs2627313 | T | C | 0.151 | 0.0276 | 0.5543 | 0.0143 | 0.05318 | 0.0175 | 757601 | 5.86E-18 |
| rs2643826 | T | C | 0.1857 | 0.0163 | 0.5492 | 0.0146 | 0.2646 | 0.0175 | 757601 | 2.83E-26 |
| rs2681485 | A | G | 0.2945 | 0.0077 | 0.4024 | 0.0144 | 0.5919 | 0.0176 | 757601 | 1.31E-62 |
| rs2744133 | A | G | 0.1435 | 0.0096 | 0.2749 | 0.0159 | 0.5486 | 0.0193 | 757601 | 1.17E-13 |
| rs28377357 | A | G | -0.1243 | 0.0255 | 0.7062 | 0.0158 | 0.1075 | 0.019 | 757601 | 6.03E-11 |
| rs28429256 | A | G | 0.1636 | 0.0319 | 0.6656 | 0.0159 | 0.04475 | 0.0188 | 757601 | 2.83E-18 |
| rs28544928 | T | G | 0.1543 | -0.0038 | 0.2535 | 0.0165 | 0.82 | 0.0199 | 757601 | 9.13E-15 |
| rs28570096 | T | C | 0.1396 | 0.0085 | 0.6906 | 0.0155 | 0.5833 | 0.0188 | 757601 | 1.15E-13 |
| rs28661492 | T | C | -0.1359 | 0.0053 | 0.7978 | 0.0187 | 0.7764 | 0.0222 | 757601 | 9.56E-10 |
| rs28675079 | A | G | -0.1444 | -0.0014 | 0.8133 | 0.0184 | 0.939 | 0.0222 | 757601 | 8.34E-11 |
| rs2906152 | A | G | -0.1873 | -0.009 | 0.3696 | 0.0151 | 0.5489 | 0.0181 | 757601 | 5.55E-25 |
| rs2921604 | T | C | -0.096 | 0.0204 | 0.4633 | 0.0145 | 0.1612 | 0.0176 | 757601 | 4.46E-08 |
| rs2925345 | T | C | 0.189 | -0.0129 | 0.5324 | 0.0146 | 0.3788 | 0.0174 | 757601 | 1.60E-27 |
| rs2957468 | A | G | 0.1377 | -6.00E-04 | 0.6646 | 0.0153 | 0.9673 | 0.0185 | 757601 | 8.43E-14 |
| rs2978098 | A | C | 0.1548 | -0.0344 | 0.4535 | 0.0145 | 0.01805 | 0.0176 | 757601 | 1.33E-18 |
| rs3006583 | T | C | -0.1303 | -0.0488 | 0.1886 | 0.018 | 0.006792 | 0.0222 | 757601 | 4.66E-09 |
| rs311564 | A | G | -0.133 | -0.0127 | 0.6539 | 0.0152 | 0.4027 | 0.0183 | 757601 | 4.23E-13 |
| rs3117736 | T | C | 0.2374 | -0.018 | 0.7339 | 0.0162 | 0.2659 | 0.0196 | 757601 | 9.71E-34 |
| rs34130368 | T | G | -0.2027 | 4.00E-04 | 0.8828 | 0.0244 | 0.9872 | 0.0284 | 757601 | 8.77E-13 |
| rs342977 | A | G | -0.1577 | -0.0068 | 0.2285 | 0.0171 | 0.6898 | 0.0205 | 757601 | 1.67E-14 |
| rs34487963 | A | C | -0.5734 | 0.0263 | 0.9815 | 0.06 | 0.6607 | 0.0712 | 757601 | 8.18E-16 |
| rs34517439 | A | C | -0.2514 | -0.0028 | 0.8801 | 0.0255 | 0.9114 | 0.0279 | 757601 | 2.02E-19 |
| rs34645159 | A | G | -0.133 | 0.0099 | 0.4987 | 0.0143 | 0.4891 | 0.0174 | 757601 | 2.07E-14 |
| rs347585 | T | C | 0.1506 | -0.0247 | 0.2986 | 0.0154 | 0.1092 | 0.0189 | 757601 | 1.57E-15 |
| rs35091929 | T | C | 0.1828 | -0.0069 | 0.6032 | 0.0148 | 0.6384 | 0.0177 | 757601 | 6.46E-25 |
| rs35213536 | T | G | 0.2044 | -0.0318 | 0.7533 | 0.0171 | 0.06261 | 0.0205 | 757601 | 2.54E-23 |
| rs35261542 | A | C | 0.1196 | -0.0091 | 0.7321 | 0.0161 | 0.5712 | 0.0195 | 757601 | 9.29E-10 |
| rs35413927 | A | G | -0.1274 | 0.0195 | 0.3049 | 0.0156 | 0.2114 | 0.0189 | 757601 | 1.77E-11 |
| rs35506078 | T | C | -0.1348 | 0.005 | 0.3366 | 0.0153 | 0.7417 | 0.0183 | 757601 | 1.54E-13 |
| rs35927325 | T | C | 0.2221 | -0.0082 | 0.9386 | 0.03 | 0.786 | 0.0364 | 757601 | 1.01E-09 |
| rs360153 | T | C | -0.2198 | 0.015 | 0.5828 | 0.0145 | 0.2994 | 0.0175 | 757601 | 4.37E-36 |
| rs36117336 | T | C | -0.147 | 0.0079 | 0.2562 | 0.0165 | 0.6333 | 0.0198 | 757601 | 1.10E-13 |
| rs3735533 | T | C | -0.487 | -0.0173 | 0.9258 | 0.0277 | 0.5309 | 0.0331 | 757601 | 6.32E-49 |
| rs3743111 | A | G | 0.1517 | 0.0039 | 0.387 | 0.0147 | 0.7904 | 0.0178 | 757601 | 1.62E-17 |
| rs3743369 | A | G | 0.104 | -3.00E-04 | 0.3722 | 0.0148 | 0.9844 | 0.0179 | 757601 | 6.82E-09 |
| rs3772219 | A | C | 0.1754 | -0.0441 | 0.3193 | 0.0155 | 0.004517 | 0.0185 | 757601 | 2.94E-21 |
| rs3774702 | A | G | 0.147 | 0.0039 | 0.8232 | 0.0186 | 0.8341 | 0.0228 | 757601 | 1.18E-10 |
| rs3776299 | A | G | 0.1266 | -0.0057 | 0.5441 | 0.0142 | 0.6887 | 0.0175 | 757601 | 5.06E-13 |
| rs3785837 | A | G | 0.1453 | 0.0031 | 0.2365 | 0.0173 | 0.8587 | 0.0213 | 757601 | 9.57E-12 |
| rs3798293 | A | G | -0.1328 | 0.0211 | 0.2165 | 0.0171 | 0.2173 | 0.021 | 757601 | 2.70E-10 |
| rs3802230 | A | C | -0.1605 | 0.0132 | 0.4554 | 0.0143 | 0.3547 | 0.0174 | 757601 | 2.75E-20 |
| rs3807101 | T | C | -0.1743 | -0.0261 | 0.877 | 0.0218 | 0.2329 | 0.0265 | 757601 | 4.57E-11 |
| rs3861113 | A | C | 0.2126 | -0.0146 | 0.9175 | 0.0256 | 0.5679 | 0.0322 | 757601 | 3.95E-11 |
| rs3864004 | A | G | 0.1004 | 0.0047 | 0.5315 | 0.0144 | 0.7423 | 0.0173 | 757601 | 6.28E-09 |
| rs387865 | T | C | -0.1059 | 0.0106 | 0.6938 | 0.016 | 0.5062 | 0.0191 | 757601 | 3.17E-08 |
| rs3916033 | T | C | -0.1233 | 0.0013 | 0.4435 | 0.0152 | 0.9307 | 0.0185 | 757601 | 2.42E-11 |
| rs3918226 | T | C | 0.6117 | -0.0337 | 0.9187 | 0.0284 | 0.2361 | 0.0329 | 757601 | 5.31E-77 |
| rs3943093 | T | C | 0.2477 | 0.0247 | 0.6766 | 0.0151 | 0.1026 | 0.0184 | 757601 | 3.95E-41 |
| rs4074812 | A | G | -0.1336 | -3.00E-04 | 0.4465 | 0.0143 | 0.9838 | 0.0175 | 757601 | 2.07E-14 |
| rs4077158 | T | C | -0.1832 | -0.0024 | 0.5286 | 0.0143 | 0.8665 | 0.0173 | 757601 | 3.09E-26 |
| rs4102481 | T | G | -0.1248 | 0.0022 | 0.3049 | 0.0155 | 0.8888 | 0.019 | 757601 | 4.87E-11 |
| rs4141663 | T | C | -0.1496 | -0.0242 | 0.5784 | 0.0144 | 0.09278 | 0.0175 | 757601 | 1.41E-17 |
| rs4362428 | A | C | -0.1127 | -0.0321 | 0.5913 | 0.0143 | 0.02525 | 0.0176 | 757601 | 1.45E-10 |
| rs440454 | A | G | -0.2602 | 0.024 | 0.684 | 0.0163 | 0.1402 | 0.0192 | 757601 | 7.52E-42 |
| rs4424827 | T | C | -0.0981 | 0.0025 | 0.4331 | 0.0143 | 0.8619 | 0.0175 | 757601 | 2.11E-08 |
| rs4507125 | A | C | -0.1244 | -0.0341 | 0.2136 | 0.0174 | 0.04993 | 0.0211 | 757601 | 3.60E-09 |
| rs45474499 | T | C | 0.3562 | -0.0254 | 0.9527 | 0.0335 | 0.4494 | 0.0415 | 757601 | 8.50E-18 |
| rs4556017 | T | C | -0.1601 | 0.0193 | 0.1476 | 0.0209 | 0.3546 | 0.0247 | 757601 | 9.67E-11 |
| rs4615669 | A | G | -0.114 | -0.0313 | 0.4403 | 0.0152 | 0.03996 | 0.0174 | 757601 | 6.10E-11 |
| rs4645335 | A | G | 0.1142 | -0.008 | 0.664 | 0.0154 | 0.6034 | 0.0185 | 757601 | 7.04E-10 |
| rs4651224 | T | C | 0.1102 | 0.0149 | 0.5531 | 0.0144 | 0.3007 | 0.0175 | 757601 | 3.39E-10 |
| rs4675682 | T | C | -0.1409 | 0.0068 | 0.4622 | 0.0143 | 0.6359 | 0.0173 | 757601 | 4.49E-16 |
| rs4704514 | T | C | 0.1087 | -0.0049 | 0.7167 | 0.016 | 0.7612 | 0.0193 | 757601 | 1.71E-08 |
| rs4722548 | T | C | -0.1346 | -0.0118 | 0.3996 | 0.0145 | 0.4154 | 0.0176 | 757601 | 1.99E-14 |
| rs4726006 | A | G | 0.1339 | -3.00E-04 | 0.7452 | 0.0164 | 0.9837 | 0.02 | 757601 | 2.39E-11 |
| rs4743021 | T | C | -0.108 | 0.0068 | 0.3147 | 0.0166 | 0.6839 | 0.0194 | 757601 | 2.41E-08 |
| rs4756782 | A | C | 0.1551 | 0.0196 | 0.835 | 0.0191 | 0.3058 | 0.0234 | 757601 | 3.52E-11 |
| rs4814837 | T | C | -0.1003 | -0.0165 | 0.6576 | 0.015 | 0.2716 | 0.0184 | 757601 | 4.62E-08 |
| rs4873492 | T | C | 0.1401 | 0.0199 | 0.8275 | 0.0185 | 0.2812 | 0.0231 | 757601 | 1.28E-09 |
| rs488834 | T | C | -0.1931 | -0.0111 | 0.2359 | 0.0173 | 0.5215 | 0.0208 | 757601 | 1.94E-20 |
| rs4891258 | A | G | -0.1159 | 4.00E-04 | 0.3174 | 0.0155 | 0.9771 | 0.0187 | 757601 | 5.72E-10 |
| rs4903064 | T | C | 0.1543 | 0.0011 | 0.2355 | 0.0167 | 0.9454 | 0.0206 | 757601 | 7.84E-14 |
| rs4912840 | A | G | -0.1485 | 0.018 | 0.8453 | 0.0202 | 0.3738 | 0.0245 | 757601 | 1.25E-09 |
| rs4926901 | A | G | 0.0984 | 5.00E-04 | 0.6452 | 0.015 | 0.976 | 0.018 | 757601 | 4.82E-08 |
| rs4926923 | T | C | 0.1918 | 0.0274 | 0.0883 | 0.025 | 0.2717 | 0.0308 | 757601 | 4.75E-10 |
| rs4932373 | A | C | -0.3664 | -0.0052 | 0.3257 | 0.0163 | 0.7484 | 0.0189 | 757601 | 7.71E-84 |
| rs4936099 | A | C | 0.1745 | -0.0151 | 0.4011 | 0.0149 | 0.3104 | 0.0178 | 757601 | 1.16E-22 |
| rs4948643 | T | C | 0.1591 | -0.0037 | 0.718 | 0.0158 | 0.8167 | 0.0194 | 757601 | 2.26E-16 |
| rs4952668 | A | G | -0.192 | -0.0091 | 0.3763 | 0.015 | 0.5446 | 0.018 | 757601 | 1.13E-26 |
| rs4954192 | T | C | -0.1225 | 0.0378 | 0.6128 | 0.0146 | 0.009791 | 0.0179 | 757601 | 8.15E-12 |
| rs5010183 | T | C | 0.1195 | 0.0071 | 0.372 | 0.0149 | 0.635 | 0.018 | 757601 | 2.86E-11 |
| rs504217 | T | C | 0.2745 | 0.0295 | 0.9264 | 0.0274 | 0.2818 | 0.0335 | 757601 | 2.51E-16 |
| rs504691 | A | C | -0.1177 | -0.004 | 0.5998 | 0.0146 | 0.7822 | 0.0177 | 757601 | 3.14E-11 |
| rs507666 | A | G | -0.2854 | -0.0112 | 0.8128 | 0.0179 | 0.532 | 0.0223 | 757601 | 2.27E-37 |
| rs509067 | T | C | -0.1436 | -0.0116 | 0.5863 | 0.0144 | 0.42 | 0.0175 | 757601 | 2.65E-16 |
| rs521033 | A | G | -0.1802 | -0.019 | 0.1364 | 0.0201 | 0.3454 | 0.0253 | 757601 | 1.10E-12 |
| rs55684003 | A | G | 0.122 | 0.0103 | 0.3041 | 0.0155 | 0.5052 | 0.0189 | 757601 | 1.01E-10 |
| rs55747751 | A | G | -0.2239 | 0.0014 | 0.919 | 0.0296 | 0.963 | 0.0331 | 757601 | 1.39E-11 |
| rs55770741 | T | C | -0.1281 | 0.0104 | 0.4387 | 0.0147 | 0.4792 | 0.0175 | 757601 | 2.20E-13 |
| rs55857306 | A | G | -0.5224 | 0.0569 | 0.8398 | 0.0197 | 0.003821 | 0.0235 | 757601 | 5.05E-109 |
| rs55935819 | A | G | 0.1271 | 0.0134 | 0.6364 | 0.015 | 0.3723 | 0.0181 | 757601 | 1.96E-12 |
| rs55938136 | A | G | 0.1408 | 0.0393 | 0.2249 | 0.0179 | 0.02782 | 0.0225 | 757601 | 4.21E-10 |
| rs55944332 | A | G | -0.2365 | 0.0081 | 0.2368 | 0.017 | 0.6349 | 0.0204 | 757601 | 3.27E-31 |
| rs55993676 | T | G | -0.2097 | -0.003 | 0.7084 | 0.0161 | 0.8519 | 0.0191 | 757601 | 3.82E-28 |
| rs56256111 | A | G | 0.1926 | 0.0174 | 0.8558 | 0.024 | 0.4695 | 0.0263 | 757601 | 2.60E-13 |
| rs56345595 | A | G | 0.1329 | 0.0201 | 0.4152 | 0.0148 | 0.1748 | 0.0177 | 757601 | 5.20E-14 |
| rs569550 | T | G | -0.2688 | 0.0191 | 0.3954 | 0.0152 | 0.209 | 0.0181 | 757601 | 1.23E-49 |
| rs5753630 | A | G | 0.107 | 0.0016 | 0.4382 | 0.0144 | 0.9098 | 0.0175 | 757601 | 8.76E-10 |
| rs57708073 | A | G | 0.1907 | -0.0069 | 0.2608 | 0.0183 | 0.7072 | 0.0214 | 757601 | 4.73E-19 |
| rs58693787 | A | G | 0.1584 | 0.0082 | 0.2458 | 0.0165 | 0.6184 | 0.0202 | 757601 | 3.82E-15 |
| rs5992929 | T | C | 0.1684 | 0.0206 | 0.7166 | 0.0161 | 0.201 | 0.0193 | 757601 | 3.07E-18 |
| rs602521 | A | G | 0.1351 | -0.0016 | 0.7344 | 0.0161 | 0.922 | 0.0195 | 757601 | 3.97E-12 |
| rs6031431 | A | G | -0.1153 | -0.0124 | 0.4622 | 0.0146 | 0.3925 | 0.0175 | 757601 | 4.94E-11 |
| rs604723 | T | C | -0.3848 | -0.001 | 0.7247 | 0.0158 | 0.9477 | 0.0194 | 757601 | 2.32E-87 |
| rs6078393 | T | G | 0.1205 | -0.0023 | 0.4106 | 0.0146 | 0.8739 | 0.0176 | 757601 | 7.66E-12 |
| rs6108168 | A | C | -0.1901 | 0.0105 | 0.7454 | 0.0166 | 0.5263 | 0.0199 | 757601 | 1.10E-21 |
| rs61772592 | A | G | -0.1509 | -0.016 | 0.1257 | 0.0214 | 0.4557 | 0.0261 | 757601 | 7.42E-09 |
| rs61789369 | A | G | -0.3039 | 0.0203 | 0.0435 | 0.0368 | 0.5817 | 0.0436 | 757601 | 3.07E-12 |
| rs61917655 | T | C | 0.2246 | -0.0013 | 0.8989 | 0.0245 | 0.9578 | 0.0297 | 757601 | 3.72E-14 |
| rs61948065 | A | C | -0.1737 | -0.013 | 0.1212 | 0.0233 | 0.577 | 0.027 | 757601 | 1.17E-10 |
| rs62030049 | A | G | 0.1336 | 0.004 | 0.2404 | 0.0179 | 0.8245 | 0.0209 | 757601 | 1.55E-10 |
| rs62064603 | T | C | -0.1335 | -0.0237 | 0.8144 | 0.0183 | 0.1962 | 0.0229 | 757601 | 5.52E-09 |
| rs62155750 | A | G | -0.2177 | -0.0091 | 0.3074 | 0.0171 | 0.5928 | 0.0196 | 757601 | 8.27E-29 |
| rs62158170 | A | G | 0.1645 | 0.0087 | 0.2166 | 0.0176 | 0.6233 | 0.0211 | 757601 | 6.63E-15 |
| rs62234672 | A | C | 0.1248 | -0.0194 | 0.8248 | 0.0189 | 0.3048 | 0.0229 | 757601 | 4.92E-08 |
| rs62294352 | T | C | -0.1605 | 0.0116 | 0.7843 | 0.0187 | 0.5357 | 0.0223 | 757601 | 6.07E-13 |
| rs62301873 | A | G | -0.1734 | 0.0476 | 0.1061 | 0.0249 | 0.05573 | 0.0284 | 757601 | 1.06E-09 |
| rs62380354 | A | C | 0.1825 | 9.00E-04 | 0.1096 | 0.0257 | 0.9711 | 0.0291 | 757601 | 3.68E-10 |
| rs62413546 | T | C | -0.1877 | 0.0052 | 0.9153 | 0.027 | 0.8475 | 0.032 | 757601 | 4.58E-09 |
| rs62434124 | T | C | -0.4853 | 0.0081 | 0.9289 | 0.0285 | 0.7765 | 0.0338 | 757601 | 7.83E-47 |
| rs62503324 | T | C | 0.2033 | 0.0269 | 0.7603 | 0.0172 | 0.1182 | 0.0204 | 757601 | 2.11E-23 |
| rs6271 | T | C | -0.4313 | -0.0258 | 0.9263 | 0.037 | 0.4865 | 0.0352 | 757601 | 1.72E-34 |
| rs636202 | T | C | 0.1023 | -0.004 | 0.5185 | 0.0146 | 0.7858 | 0.0174 | 757601 | 4.40E-09 |
| rs6442105 | A | G | -0.2485 | -0.0195 | 0.6726 | 0.0153 | 0.2018 | 0.0185 | 757601 | 3.10E-41 |
| rs6445590 | A | G | 0.1284 | 0.0098 | 0.5455 | 0.0144 | 0.493 | 0.0174 | 757601 | 1.65E-13 |
| rs6464165 | T | C | -0.217 | -0.0024 | 0.2809 | 0.0163 | 0.8852 | 0.0195 | 757601 | 7.34E-29 |
| rs6487076 | A | G | 0.174 | -0.0022 | 0.223 | 0.0175 | 0.9021 | 0.0209 | 757601 | 8.69E-17 |
| rs6490019 | A | G | -0.1778 | 0.0195 | 0.6203 | 0.0147 | 0.1841 | 0.0178 | 757601 | 2.10E-23 |
| rs6504163 | T | C | -0.1842 | 0.0474 | 0.3763 | 0.0152 | 0.001788 | 0.0183 | 757601 | 6.30E-24 |
| rs6546810 | T | C | -0.12 | -0.0017 | 0.3525 | 0.0149 | 0.9116 | 0.0181 | 757601 | 3.16E-11 |
| rs6556384 | A | C | -0.152 | -0.0178 | 0.1895 | 0.0181 | 0.3253 | 0.0221 | 757601 | 5.91E-12 |
| rs6580970 | T | C | -0.1661 | -0.0089 | 0.7013 | 0.0159 | 0.5777 | 0.0191 | 757601 | 4.03E-18 |
| rs6581101 | A | C | -0.1261 | -0.0091 | 0.3962 | 0.015 | 0.5446 | 0.0179 | 757601 | 2.05E-12 |
| rs6602177 | T | C | -0.1203 | 0.0103 | 0.2927 | 0.0163 | 0.5287 | 0.0207 | 757601 | 6.52E-09 |
| rs66682451 | A | G | 0.1348 | -0.0145 | 0.2747 | 0.0159 | 0.364 | 0.0194 | 757601 | 3.44E-12 |
| rs6686889 | T | C | 0.1918 | -0.0086 | 0.7467 | 0.0164 | 0.6027 | 0.0199 | 757601 | 6.95E-22 |
| rs66887589 | T | C | -0.161 | 0.0099 | 0.4779 | 0.0143 | 0.4911 | 0.0174 | 757601 | 1.83E-20 |
| rs6763931 | A | G | 0.1383 | -0.0169 | 0.5562 | 0.0143 | 0.2366 | 0.0173 | 757601 | 1.48E-15 |
| rs6777317 | A | G | 0.1249 | 0.024 | 0.7101 | 0.0158 | 0.128 | 0.0195 | 757601 | 1.51E-10 |
| rs6779368 | A | G | -0.1791 | -0.0153 | 0.3423 | 0.0155 | 0.3221 | 0.0184 | 757601 | 2.28E-22 |
| rs6795735 | T | C | -0.1438 | -0.0256 | 0.5891 | 0.0145 | 0.07692 | 0.0176 | 757601 | 3.05E-16 |
| rs68085857 | T | C | 0.191 | -0.0213 | 0.766 | 0.0167 | 0.2042 | 0.0205 | 757601 | 9.83E-21 |
| rs682681 | T | C | -0.1454 | 0.0036 | 0.6665 | 0.0153 | 0.8141 | 0.0185 | 757601 | 4.47E-15 |
| rs6875967 | A | G | 0.1344 | 0.0119 | 0.6479 | 0.0153 | 0.4363 | 0.0181 | 757601 | 1.21E-13 |
| rs6905288 | A | G | 0.1759 | -0.0072 | 0.4319 | 0.0153 | 0.6389 | 0.0179 | 757601 | 7.79E-23 |
| rs6934891 | A | G | 0.1275 | 0.0325 | 0.5745 | 0.0147 | 0.02723 | 0.0177 | 757601 | 5.21E-13 |
| rs693974 | T | C | -0.1847 | -0.0039 | 0.3964 | 0.0147 | 0.7886 | 0.0177 | 757601 | 1.76E-25 |
| rs6959688 | A | G | -0.1269 | 0.033 | 0.4015 | 0.0148 | 0.02597 | 0.0178 | 757601 | 1.02E-12 |
| rs6983239 | T | G | 0.1159 | -0.0067 | 0.7812 | 0.0171 | 0.6957 | 0.0211 | 757601 | 3.71E-08 |
| rs699 | A | G | -0.2359 | 0.0314 | 0.407 | 0.0144 | 0.02953 | 0.0177 | 757601 | 1.30E-40 |
| rs7012891 | T | C | -0.1391 | -0.0144 | 0.2367 | 0.0165 | 0.3853 | 0.0205 | 757601 | 1.20E-11 |
| rs7106104 | T | C | -0.1186 | 0.009 | 0.281 | 0.0158 | 0.5669 | 0.0193 | 757601 | 7.72E-10 |
| rs710698 | A | G | 0.1059 | 0.0028 | 0.4135 | 0.0145 | 0.8453 | 0.0176 | 757601 | 1.89E-09 |
| rs7115331 | T | G | -0.1266 | 0.0161 | 0.2857 | 0.0156 | 0.3041 | 0.0192 | 757601 | 3.92E-11 |
| rs7137828 | T | C | -0.5027 | 0.0216 | 0.4817 | 0.0144 | 0.1334 | 0.0176 | 757601 | 4.80E-180 |
| rs7155504 | T | C | 0.2286 | -0.0299 | 0.0876 | 0.0249 | 0.2298 | 0.0317 | 757601 | 5.16E-13 |
| rs7169864 | T | C | -0.1132 | 0.0287 | 0.7678 | 0.0172 | 0.0938 | 0.0205 | 757601 | 3.40E-08 |
| rs7192407 | T | C | 0.1019 | 0.0118 | 0.528 | 0.0143 | 0.4097 | 0.0174 | 757601 | 4.53E-09 |
| rs7217916 | A | G | 0.1111 | 0.0051 | 0.6146 | 0.0148 | 0.7304 | 0.0179 | 757601 | 5.63E-10 |
| rs7227492 | T | C | 0.181 | -0.0141 | 0.1822 | 0.0187 | 0.4513 | 0.0227 | 757601 | 1.43E-15 |
| rs722783 | A | G | -0.2093 | 0.0385 | 0.7784 | 0.0171 | 0.02397 | 0.0208 | 757601 | 9.03E-24 |
| rs7257694 | T | C | 0.1837 | 0.0185 | 0.5997 | 0.0152 | 0.2237 | 0.0178 | 757601 | 6.28E-25 |
| rs7258382 | T | C | 0.2624 | 0.0347 | 0.1611 | 0.0204 | 0.08964 | 0.0248 | 757601 | 3.03E-26 |
| rs7265695 | T | C | 0.1967 | -0.0248 | 0.1965 | 0.0185 | 0.1799 | 0.0219 | 757601 | 2.48E-19 |
| rs72683923 | T | C | 0.5325 | 0.1035 | 0.0212 | 0.0504 | 0.03993 | 0.0635 | 757601 | 5.02E-17 |
| rs72719149 | T | C | -0.1279 | -0.0143 | 0.3164 | 0.0152 | 0.3459 | 0.0186 | 757601 | 6.34E-12 |
| rs7278003 | T | C | -0.1293 | -0.0078 | 0.5615 | 0.0144 | 0.5904 | 0.0176 | 757601 | 1.78E-13 |
| rs72831343 | T | G | 0.4936 | -8.00E-04 | 0.1419 | 0.0203 | 0.9703 | 0.0248 | 757601 | 4.77E-88 |
| rs72842207 | T | C | -0.2112 | 0.0159 | 0.7851 | 0.0175 | 0.3621 | 0.0211 | 757601 | 1.10E-23 |
| rs72976750 | T | C | -0.1718 | -0.0112 | 0.1396 | 0.0209 | 0.5934 | 0.0251 | 757601 | 7.37E-12 |
| rs72999033 | T | C | 0.2793 | 0.0132 | 0.9342 | 0.0298 | 0.6593 | 0.0358 | 757601 | 5.95E-15 |
| rs73033340 | A | G | 0.5312 | -0.0506 | 0.0362 | 0.05 | 0.3117 | 0.0525 | 757601 | 5.06E-24 |
| rs73046792 | A | G | -0.1518 | -0.0222 | 0.8408 | 0.0213 | 0.2965 | 0.0245 | 757601 | 5.87E-10 |
| rs7306947 | T | G | -0.205 | 0.0412 | 0.072 | 0.0287 | 0.1518 | 0.0342 | 757601 | 2.14E-09 |
| rs7321688 | A | C | 0.1507 | 0.0049 | 0.7675 | 0.0168 | 0.7724 | 0.0205 | 757601 | 1.99E-13 |
| rs7350752 | A | G | -0.1504 | -0.0131 | 0.8759 | 0.0229 | 0.5676 | 0.0268 | 757601 | 1.97E-08 |
| rs7427249 | A | G | -0.1098 | 0.0232 | 0.42 | 0.0145 | 0.1097 | 0.0176 | 757601 | 4.34E-10 |
| rs74439044 | T | C | -0.3496 | -0.0291 | 0.0983 | 0.0245 | 0.2351 | 0.0294 | 757601 | 1.38E-32 |
| rs7491960 | T | C | -0.1288 | 0.0026 | 0.508 | 0.0145 | 0.8594 | 0.018 | 757601 | 8.44E-13 |
| rs751984 | T | C | 0.3937 | -0.0029 | 0.1174 | 0.0232 | 0.8997 | 0.0275 | 757601 | 1.38E-46 |
| rs7524019 | T | C | 0.1036 | -0.0084 | 0.508 | 0.0144 | 0.5615 | 0.0174 | 757601 | 2.60E-09 |
| rs75511781 | A | G | -0.3721 | -0.059 | 0.0425 | 0.0467 | 0.2068 | 0.047 | 757601 | 2.45E-15 |
| rs75717699 | T | G | -0.4667 | -0.0482 | 0.0305 | 0.0533 | 0.3655 | 0.0541 | 757601 | 6.71E-18 |
| rs7572130 | A | G | -0.1796 | 0.019 | 0.1042 | 0.0232 | 0.4137 | 0.0287 | 757601 | 4.12E-10 |
| rs7592578 | T | G | -0.1998 | -0.007 | 0.8062 | 0.0181 | 0.699 | 0.0224 | 757601 | 4.71E-19 |
| rs7623706 | A | G | 0.0975 | 0.0056 | 0.4349 | 0.0144 | 0.6975 | 0.0176 | 757601 | 2.84E-08 |
| rs76326501 | A | C | 0.3618 | -0.0114 | 0.0911 | 0.0258 | 0.6584 | 0.0305 | 757601 | 2.17E-32 |
| rs76452347 | T | C | -0.2246 | -0.0019 | 0.7947 | 0.0199 | 0.9252 | 0.0229 | 757601 | 9.37E-23 |
| rs76719272 | T | C | -0.1438 | -0.0569 | 0.8685 | 0.023 | 0.0133 | 0.0264 | 757601 | 4.86E-08 |
| rs76785130 | A | G | -0.4285 | 0.0335 | 0.0199 | 0.0568 | 0.556 | 0.0662 | 757601 | 9.36E-11 |
| rs76954792 | T | C | 0.1213 | -0.0267 | 0.7678 | 0.0174 | 0.1247 | 0.0208 | 757601 | 5.06E-09 |
| rs77032376 | T | C | -0.173 | -0.0057 | 0.8521 | 0.021 | 0.7855 | 0.0249 | 757601 | 3.64E-12 |
| rs7737851 | T | C | -0.1256 | 0.0047 | 0.8056 | 0.018 | 0.7936 | 0.022 | 757601 | 1.11E-08 |
| rs7767235 | A | C | -0.1181 | 0.0301 | 0.6468 | 0.0151 | 0.04562 | 0.0182 | 757601 | 7.95E-11 |
| rs7788746 | T | G | -0.1644 | 0.0427 | 0.3309 | 0.0152 | 0.004935 | 0.0183 | 757601 | 3.19E-19 |
| rs77924615 | A | G | -0.3163 | -0.0131 | 0.8018 | 0.0189 | 0.4878 | 0.0224 | 757601 | 3.72E-45 |
| rs7800558 | T | C | 0.096 | 0.0068 | 0.4219 | 0.0145 | 0.6382 | 0.0175 | 757601 | 4.46E-08 |
| rs78151625 | T | C | -0.1869 | -0.0322 | 0.1658 | 0.0195 | 0.0981 | 0.0233 | 757601 | 1.04E-15 |
| rs786921 | A | G | -0.1145 | 0.0031 | 0.4043 | 0.0144 | 0.8271 | 0.0176 | 757601 | 8.63E-11 |
| rs78809139 | A | G | -0.2281 | -0.0106 | 0.8986 | 0.0244 | 0.6638 | 0.0288 | 757601 | 2.58E-15 |
| rs78909293 | T | C | 0.321 | -0.0035 | 0.0449 | 0.0346 | 0.9207 | 0.0429 | 757601 | 7.31E-14 |
| rs79208229 | T | G | 0.2128 | -0.0816 | 0.9125 | 0.0295 | 0.005631 | 0.0326 | 757601 | 6.53E-11 |
| rs7926335 | T | C | 0.1804 | 0.0211 | 0.7301 | 0.0161 | 0.1892 | 0.0195 | 757601 | 2.05E-20 |
| rs79286081 | A | G | -0.1631 | 0.0228 | 0.8979 | 0.0238 | 0.3366 | 0.0299 | 757601 | 4.83E-08 |
| rs7933758 | T | C | -0.1138 | 0.016 | 0.6953 | 0.0158 | 0.3112 | 0.0191 | 757601 | 2.58E-09 |
| rs7959649 | T | C | 0.1166 | 0.002 | 0.7576 | 0.0167 | 0.9033 | 0.0202 | 757601 | 8.14E-09 |
| rs7967705 | T | C | 0.2694 | 0.0031 | 0.6196 | 0.0146 | 0.8303 | 0.0178 | 757601 | 1.54E-51 |
| rs79889784 | T | G | -0.3941 | 0.0466 | 0.9824 | 0.0538 | 0.3869 | 0.0717 | 757601 | 3.86E-08 |
| rs7990017 | T | C | 0.1039 | -0.0032 | 0.5267 | 0.017 | 0.8529 | 0.0185 | 757601 | 1.92E-08 |
| rs7992292 | A | G | 0.1367 | 0.0085 | 0.176 | 0.0188 | 0.6518 | 0.0231 | 757601 | 3.19E-09 |
| rs80095680 | A | G | -0.1566 | 0.0352 | 0.2633 | 0.0165 | 0.03301 | 0.0198 | 757601 | 2.81E-15 |
| rs8014182 | T | C | -0.1942 | -0.0442 | 0.8681 | 0.0209 | 0.03428 | 0.0257 | 757601 | 3.94E-14 |
| rs8046697 | T | C | -0.1289 | 0.0153 | 0.5833 | 0.015 | 0.3059 | 0.0179 | 757601 | 6.10E-13 |
| rs8108717 | A | G | 0.1323 | -0.0146 | 0.6084 | 0.0149 | 0.3262 | 0.0179 | 757601 | 1.39E-13 |
| rs824523 | A | C | 0.1226 | -0.0032 | 0.6656 | 0.015 | 0.8305 | 0.0183 | 757601 | 2.26E-11 |
| rs881858 | A | G | 0.1553 | -0.0108 | 0.306 | 0.0163 | 0.5065 | 0.0191 | 757601 | 4.65E-16 |
| rs882624 | T | C | -0.1571 | 0.0069 | 0.6675 | 0.0153 | 0.6514 | 0.0185 | 757601 | 2.33E-17 |
| rs908951 | T | C | -0.1983 | 0.0161 | 0.563 | 0.0154 | 0.2956 | 0.0181 | 757601 | 7.73E-28 |
| rs917522 | T | C | 0.1665 | -0.0083 | 0.115 | 0.0219 | 0.7059 | 0.0273 | 757601 | 1.04E-09 |
| rs9286351 | A | G | -0.1412 | 0.0195 | 0.4188 | 0.0146 | 0.1823 | 0.0177 | 757601 | 1.61E-15 |
| rs9289557 | T | C | -0.119 | 0.0402 | 0.7396 | 0.0187 | 0.0317 | 0.0207 | 757601 | 8.68E-09 |
| rs9326869 | T | C | 0.1096 | -0.0168 | 0.7513 | 0.0163 | 0.3034 | 0.02 | 757601 | 3.99E-08 |
| rs9365555 | A | G | 0.1254 | -0.0062 | 0.3259 | 0.0155 | 0.6887 | 0.0187 | 757601 | 1.96E-11 |
| rs9399137 | T | C | 0.1148 | -0.0034 | 0.2619 | 0.0164 | 0.8363 | 0.0197 | 757601 | 5.83E-09 |
| rs9406076 | T | C | 0.101 | 0.0097 | 0.6722 | 0.0154 | 0.5297 | 0.0185 | 757601 | 4.65E-08 |
| rs9419374 | A | G | 0.1164 | 0.0088 | 0.646 | 0.0158 | 0.5784 | 0.0185 | 757601 | 3.44E-10 |
| rs9478282 | T | C | -0.1994 | -0.0111 | 0.8884 | 0.0233 | 0.6324 | 0.0279 | 757601 | 8.70E-13 |
| rs9508495 | T | C | -0.1944 | 0.0032 | 0.2431 | 0.0168 | 0.849 | 0.0204 | 757601 | 1.34E-21 |
| rs9526707 | A | G | -0.1217 | -0.0128 | 0.6778 | 0.0155 | 0.4087 | 0.0186 | 757601 | 6.59E-11 |
| rs9563529 | T | G | 0.1222 | -0.0022 | 0.7957 | 0.0179 | 0.9025 | 0.0215 | 757601 | 1.38E-08 |
| rs962369 | T | C | 0.1684 | -0.0349 | 0.3013 | 0.0158 | 0.02682 | 0.0189 | 757601 | 6.02E-19 |
| rs9638084 | A | G | 0.1154 | -0.0456 | 0.6022 | 0.0149 | 0.002162 | 0.0178 | 757601 | 8.51E-11 |
| rs9791312 | A | C | -0.1225 | 0.0018 | 0.3452 | 0.0152 | 0.9034 | 0.0184 | 757601 | 2.89E-11 |
| rs9918907 | A | G | -0.1188 | 5.00E-04 | 0.2162 | 0.0171 | 0.9753 | 0.021 | 757601 | 1.59E-08 |
| rs9932220 | A | G | -0.1591 | -0.0136 | 0.7823 | 0.0179 | 0.4475 | 0.021 | 757601 | 3.76E-14 |
| rs9937801 | T | C | 0.1554 | -0.0301 | 0.4308 | 0.0145 | 0.03748 | 0.0174 | 757601 | 4.81E-19 |

**Additional file 6 Genome-wide significant and independent SNPs that were used as instruments for PP**

| SNP | effect_allele | other_allele | beta.exposure | beta.outcome | eaf | se.outcome | pval.outcome | se.exposure | samplesize | pval.exposure |
| --- | --- | --- | --- | --- | --- | --- | --- | --- | --- | --- |
| rs10052777 | T | C | -0.2457 | -0.0124 | 0.3931 | 0.0144 | 0.3898 | 0.021 | 757601 | 1.70E-31 |
| rs10076730 | T | C | 0.2217 | 0.0148 | 0.3749 | 0.0145 | 0.3061 | 0.0211 | 757601 | 8.02E-26 |
| rs10261098 | T | C | 0.168 | -0.0224 | 0.8458 | 0.0196 | 0.2532 | 0.0285 | 757601 | 3.95E-09 |
| rs10305838 | T | C | -0.2542 | 0.0329 | 0.1408 | 0.0202 | 0.1039 | 0.0293 | 757601 | 4.65E-18 |
| rs10433615 | T | C | 0.1655 | -0.0022 | 0.6065 | 0.0147 | 0.8816 | 0.021 | 757601 | 3.40E-15 |
| rs1047922 | T | C | -0.2121 | -0.0099 | 0.1516 | 0.0226 | 0.6607 | 0.0297 | 757601 | 9.70E-13 |
| rs10497529 | A | G | -0.4509 | -0.0052 | 0.9648 | 0.0463 | 0.9105 | 0.0575 | 757601 | 4.67E-15 |
| rs1061651 | T | C | 0.1304 | 0.0027 | 0.2648 | 0.0171 | 0.8724 | 0.0239 | 757601 | 4.95E-08 |
| rs10736585 | T | C | 0.1945 | -0.0139 | 0.3355 | 0.0149 | 0.3529 | 0.0217 | 757601 | 2.82E-19 |
| rs10770612 | A | G | 0.3421 | -0.0214 | 0.2025 | 0.0185 | 0.2467 | 0.0259 | 757601 | 5.79E-40 |
| rs10776752 | T | G | 0.3735 | -0.0169 | 0.9199 | 0.0284 | 0.5519 | 0.0392 | 757601 | 1.51E-21 |
| rs10787515 | T | C | -0.1354 | -0.0195 | 0.4785 | 0.0144 | 0.174 | 0.0206 | 757601 | 4.73E-11 |
| rs10885409 | T | C | -0.1879 | 0.0021 | 0.4675 | 0.0142 | 0.8832 | 0.0205 | 757601 | 5.17E-20 |
| rs10887914 | T | C | 0.1461 | -0.0297 | 0.5373 | 0.0144 | 0.03884 | 0.0205 | 757601 | 1.13E-12 |
| rs10890706 | T | C | -0.1622 | 0.0023 | 0.3163 | 0.0161 | 0.8879 | 0.0223 | 757601 | 3.36E-13 |
| rs10914057 | T | C | 0.1155 | -0.018 | 0.3998 | 0.0148 | 0.2247 | 0.0209 | 757601 | 3.49E-08 |
| rs1091811 | A | G | -0.1745 | 0.0295 | 0.8313 | 0.0193 | 0.1258 | 0.0275 | 757601 | 2.28E-10 |
| rs10941043 | T | G | -0.1272 | 0.0059 | 0.29 | 0.0157 | 0.7062 | 0.0225 | 757601 | 1.65E-08 |
| rs10988442 | A | G | 0.1809 | -0.0139 | 0.3801 | 0.0147 | 0.3448 | 0.0212 | 757601 | 1.38E-17 |
| rs11010470 | T | C | 0.1153 | -0.0119 | 0.5006 | 0.0143 | 0.4071 | 0.0205 | 757601 | 1.97E-08 |
| rs11031051 | A | C | -0.172 | 0.0032 | 0.3096 | 0.0155 | 0.8338 | 0.0222 | 757601 | 1.04E-14 |
| rs11037808 | T | C | 0.1366 | 0.0132 | 0.3052 | 0.0155 | 0.3934 | 0.0224 | 757601 | 9.92E-10 |
| rs11052722 | A | G | 0.1127 | 0.0146 | 0.4807 | 0.0143 | 0.307 | 0.0206 | 757601 | 4.73E-08 |
| rs11065861 | A | G | 0.1684 | -0.0377 | 0.2158 | 0.0174 | 0.02989 | 0.0249 | 757601 | 1.37E-11 |
| rs11100902 | A | G | 0.1572 | -0.0105 | 0.5157 | 0.0144 | 0.4665 | 0.0207 | 757601 | 3.21E-14 |
| rs111478946 | A | G | -0.4623 | -5.00E-04 | 0.8331 | 0.0196 | 0.9794 | 0.0276 | 757601 | 8.22E-63 |
| rs11154027 | T | C | 0.1439 | -0.0063 | 0.539 | 0.0147 | 0.6666 | 0.0208 | 757601 | 4.47E-12 |
| rs11187998 | A | G | -0.1403 | 3.00E-04 | 0.5648 | 0.0143 | 0.986 | 0.0206 | 757601 | 1.06E-11 |
| rs11190709 | A | G | 0.337 | 0.0019 | 0.1119 | 0.0227 | 0.9319 | 0.0328 | 757601 | 8.41E-25 |
| rs112005532 | T | C | -0.4967 | 0.0737 | 0.0393 | 0.0466 | 0.1137 | 0.0574 | 757601 | 4.70E-18 |
| rs1124000 | A | G | 0.1237 | -0.0039 | 0.6804 | 0.0151 | 0.794 | 0.022 | 757601 | 1.92E-08 |
| rs11248862 | A | G | 0.2282 | -0.0183 | 0.875 | 0.023 | 0.4259 | 0.0315 | 757601 | 4.68E-13 |
| rs11257655 | T | C | 0.139 | 0.0083 | 0.7904 | 0.0175 | 0.6348 | 0.0252 | 757601 | 3.67E-08 |
| rs112913898 | A | G | -0.5815 | -0.017 | 0.9179 | 0.0253 | 0.5018 | 0.0376 | 757601 | 5.68E-54 |
| rs1133400 | A | G | -0.1609 | -0.0456 | 0.2143 | 0.0178 | 0.01049 | 0.0255 | 757601 | 2.96E-10 |
| rs114697502 | T | C | -0.3813 | 0.0223 | 0.9193 | 0.0275 | 0.4167 | 0.0378 | 757601 | 5.83E-24 |
| rs11580654 | A | G | -0.2087 | 0.0243 | 0.9043 | 0.0247 | 0.3248 | 0.035 | 757601 | 2.56E-09 |
| rs11603014 | A | G | 0.1733 | 0.0149 | 0.8033 | 0.018 | 0.4057 | 0.0258 | 757601 | 1.89E-11 |
| rs11607056 | T | C | -0.1829 | 0.0156 | 0.6728 | 0.0153 | 0.3087 | 0.0218 | 757601 | 4.77E-17 |
| rs11609905 | T | C | -0.1817 | -0.0067 | 0.7252 | 0.016 | 0.674 | 0.0229 | 757601 | 2.27E-15 |
| rs11629850 | A | G | 0.1177 | -0.004 | 0.4712 | 0.0144 | 0.7812 | 0.0205 | 757601 | 9.65E-09 |
| rs11685352 | A | G | -0.1715 | 0.0413 | 0.8162 | 0.0183 | 0.02398 | 0.0264 | 757601 | 8.80E-11 |
| rs11689667 | T | C | 0.2029 | -0.0199 | 0.4556 | 0.0142 | 0.1615 | 0.0206 | 757601 | 7.36E-23 |
| rs11690961 | A | C | 0.3036 | -0.0021 | 0.1167 | 0.0223 | 0.9267 | 0.0319 | 757601 | 1.93E-21 |
| rs117557920 | A | G | 0.2363 | -0.0138 | 0.8057 | 0.0207 | 0.5042 | 0.0275 | 757601 | 8.99E-18 |
| rs11872627 | T | C | -0.2532 | 0.0329 | 0.8611 | 0.0207 | 0.1119 | 0.0298 | 757601 | 1.77E-17 |
| rs11874246 | T | C | 0.1574 | -0.0055 | 0.7043 | 0.0157 | 0.7261 | 0.0224 | 757601 | 1.93E-12 |
| rs11977526 | A | G | -0.4308 | -0.0029 | 0.5982 | 0.0149 | 0.8449 | 0.0211 | 757601 | 1.75E-92 |
| rs11988241 | T | C | -0.1323 | -0.0335 | 0.256 | 0.0162 | 0.03942 | 0.0236 | 757601 | 2.02E-08 |
| rs1198982 | A | G | -0.1242 | -0.0017 | 0.3879 | 0.0148 | 0.9095 | 0.0211 | 757601 | 3.93E-09 |
| rs12032588 | T | G | -0.1294 | 0.0189 | 0.6007 | 0.0145 | 0.193 | 0.0208 | 757601 | 5.12E-10 |
| rs12045477 | T | C | -0.176 | 0.0152 | 0.7119 | 0.0158 | 0.3372 | 0.0228 | 757601 | 1.16E-14 |
| rs12052878 | A | G | -0.1497 | 0.0082 | 0.6802 | 0.0154 | 0.5943 | 0.022 | 757601 | 1.11E-11 |
| rs12138150 | T | C | -0.1954 | 0.0061 | 0.5979 | 0.0146 | 0.6772 | 0.0208 | 757601 | 5.66E-21 |
| rs12149704 | A | G | 0.7476 | -0.0234 | 0.937 | 0.0355 | 0.5108 | 0.0466 | 757601 | 5.46E-58 |
| rs12153395 | A | G | -0.2134 | -0.0099 | 0.8855 | 0.0244 | 0.6855 | 0.033 | 757601 | 1.00E-10 |
| rs12172847 | A | G | -0.1278 | -0.0461 | 0.6775 | 0.0152 | 0.002429 | 0.0218 | 757601 | 4.68E-09 |
| rs12195276 | T | C | -0.1819 | 0.0016 | 0.2748 | 0.0164 | 0.9208 | 0.0231 | 757601 | 3.49E-15 |
| rs12201429 | T | C | 0.3763 | -0.008 | 0.8618 | 0.0214 | 0.708 | 0.0298 | 757601 | 1.50E-36 |
| rs12216497 | T | C | 0.1307 | 0.0096 | 0.4384 | 0.0143 | 0.5022 | 0.0206 | 757601 | 2.25E-10 |
| rs12264186 | T | C | 0.1972 | -0.0055 | 0.8127 | 0.0184 | 0.763 | 0.0263 | 757601 | 6.90E-14 |
| rs1229984 | T | C | -0.5111 | 0.0171 | 0.9607 | 0.0351 | 0.6258 | 0.0607 | 757601 | 3.57E-17 |
| rs12476956 | T | C | 0.1307 | -0.0184 | 0.5485 | 0.0151 | 0.2235 | 0.0211 | 757601 | 6.15E-10 |
| rs12536419 | A | C | -0.6985 | 1.00E-04 | 0.1581 | 0.0197 | 0.9973 | 0.0285 | 757601 | 6.35E-133 |
| rs12603813 | T | C | -0.2683 | -0.0097 | 0.2527 | 0.0165 | 0.5578 | 0.0237 | 757601 | 8.31E-30 |
| rs12627651 | A | G | 0.134 | 0.012 | 0.7128 | 0.0166 | 0.4699 | 0.0232 | 757601 | 8.16E-09 |
| rs12630450 | A | G | 0.1947 | -0.0206 | 0.2671 | 0.0163 | 0.2084 | 0.0235 | 757601 | 1.22E-16 |
| rs12636123 | T | G | 0.1283 | -0.007 | 0.3446 | 0.0158 | 0.6563 | 0.0235 | 757601 | 4.75E-08 |
| rs12705090 | T | C | -0.2361 | 0.0138 | 0.8109 | 0.0185 | 0.4556 | 0.0262 | 757601 | 2.17E-19 |
| rs1275957 | T | G | -0.2082 | -0.0225 | 0.4082 | 0.0149 | 0.1314 | 0.0214 | 757601 | 2.62E-22 |
| rs13107325 | T | C | -0.2527 | 0.0202 | 0.926 | 0.0273 | 0.4607 | 0.0401 | 757601 | 2.91E-10 |
| rs13149209 | T | C | 0.1769 | 0.0065 | 0.2224 | 0.0171 | 0.7022 | 0.0249 | 757601 | 1.24E-12 |
| rs13189347 | A | C | -0.1408 | 0.0233 | 0.448 | 0.0144 | 0.1054 | 0.0206 | 757601 | 8.13E-12 |
| rs13199674 | A | G | 0.2204 | 0.0039 | 0.5571 | 0.0144 | 0.7893 | 0.0207 | 757601 | 1.65E-26 |
| rs13206305 | T | C | -0.156 | -0.0166 | 0.8029 | 0.0181 | 0.3603 | 0.0259 | 757601 | 1.78E-09 |
| rs13279275 | A | C | -0.1501 | 0.0264 | 0.2343 | 0.0179 | 0.1396 | 0.0252 | 757601 | 2.66E-09 |
| rs13290326 | T | C | -0.1562 | -0.0026 | 0.4988 | 0.0143 | 0.8562 | 0.0204 | 757601 | 2.11E-14 |
| rs13356445 | T | C | -0.1415 | -0.0157 | 0.7827 | 0.0173 | 0.3647 | 0.025 | 757601 | 1.45E-08 |
| rs13409792 | A | G | 0.175 | 0.0055 | 0.1404 | 0.0207 | 0.7911 | 0.0294 | 757601 | 2.58E-09 |
| rs1344652 | A | G | -0.3455 | 0.0061 | 0.6834 | 0.0153 | 0.6909 | 0.0219 | 757601 | 3.93E-56 |
| rs1350100 | A | G | 0.1653 | 0.0111 | 0.5549 | 0.0147 | 0.451 | 0.0208 | 757601 | 1.80E-15 |
| rs1351394 | T | C | -0.1811 | -0.0112 | 0.5108 | 0.0144 | 0.437 | 0.0204 | 757601 | 6.53E-19 |
| rs138285687 | T | C | -0.3304 | 0.0207 | 0.9567 | 0.0387 | 0.5934 | 0.0517 | 757601 | 1.68E-10 |
| rs139919 | T | C | -0.2476 | 0.0205 | 0.1803 | 0.0198 | 0.3015 | 0.0272 | 757601 | 8.04E-20 |
| rs141212865 | A | C | 0.1497 | 0.0097 | 0.1944 | 0.0183 | 0.5962 | 0.0263 | 757601 | 1.21E-08 |
| rs142004400 | A | C | 0.3306 | 0.0804 | 0.0361 | 0.041 | 0.04966 | 0.0566 | 757601 | 5.24E-09 |
| rs142378207 | A | G | 0.3473 | -0.0219 | 0.8689 | 0.0219 | 0.3178 | 0.0304 | 757601 | 3.50E-30 |
| rs143167197 | A | G | -0.3069 | -0.0304 | 0.0715 | 0.0288 | 0.2907 | 0.0419 | 757601 | 2.49E-13 |
| rs144822931 | T | C | 0.5092 | 0.0752 | 0.0175 | 0.0528 | 0.1545 | 0.0797 | 757601 | 1.71E-10 |
| rs1449544 | A | C | 0.1927 | -0.0164 | 0.4565 | 0.0146 | 0.2624 | 0.0205 | 757601 | 6.68E-21 |
| rs1469760 | T | C | -0.1891 | 0.0221 | 0.4162 | 0.0148 | 0.1362 | 0.0208 | 757601 | 1.16E-19 |
| rs150266910 | T | C | 0.1731 | 0.0192 | 0.8232 | 0.0185 | 0.2983 | 0.0267 | 757601 | 9.57E-11 |
| rs1520222 | A | G | 0.1285 | 0.0162 | 0.2626 | 0.0162 | 0.3171 | 0.0232 | 757601 | 2.89E-08 |
| rs1563788 | T | C | 0.2119 | 1.00E-04 | 0.7134 | 0.0155 | 0.9957 | 0.0226 | 757601 | 5.81E-21 |
| rs1599116 | T | G | -0.1682 | -0.0208 | 0.1455 | 0.0201 | 0.3011 | 0.0292 | 757601 | 8.66E-09 |
| rs1644318 | T | C | -0.2308 | -0.017 | 0.3866 | 0.0145 | 0.2401 | 0.021 | 757601 | 3.92E-28 |
| rs1687692 | A | G | 0.1594 | 0.0229 | 0.7998 | 0.0183 | 0.2104 | 0.026 | 757601 | 8.57E-10 |
| rs16939351 | A | G | -0.29 | 0.0446 | 0.9406 | 0.0314 | 0.1559 | 0.0437 | 757601 | 3.34E-11 |
| rs17010957 | T | C | -0.3456 | -0.0099 | 0.1461 | 0.0208 | 0.6349 | 0.0292 | 757601 | 2.30E-32 |
| rs17037452 | A | G | 0.3833 | -0.0576 | 0.1608 | 0.0196 | 0.003297 | 0.0278 | 757601 | 2.83E-43 |
| rs17171688 | A | G | -0.3916 | 0.0946 | 0.9541 | 0.0356 | 0.007924 | 0.0509 | 757601 | 1.50E-14 |
| rs17248720 | T | C | -0.2289 | -0.0066 | 0.8824 | 0.0223 | 0.7684 | 0.0326 | 757601 | 2.08E-12 |
| rs17271730 | A | G | 0.1631 | -0.0023 | 0.3628 | 0.0149 | 0.8762 | 0.0213 | 757601 | 2.13E-14 |
| rs17535443 | A | G | -0.3649 | 0.0018 | 0.727 | 0.0164 | 0.9124 | 0.023 | 757601 | 7.60E-57 |
| rs17562391 | T | C | 0.1713 | -0.004 | 0.5818 | 0.0146 | 0.7837 | 0.0209 | 757601 | 2.32E-16 |
| rs17608766 | T | C | -0.5274 | 0.0216 | 0.1443 | 0.0213 | 0.3112 | 0.0295 | 757601 | 2.12E-71 |
| rs17732513 | T | C | -0.1465 | -5.00E-04 | 0.649 | 0.0151 | 0.9712 | 0.0216 | 757601 | 1.10E-11 |
| rs1779240 | A | G | -0.2018 | 0.0154 | 0.2357 | 0.0167 | 0.3579 | 0.0241 | 757601 | 5.21E-17 |
| rs1800470 | A | G | -0.15 | 0.0085 | 0.3766 | 0.0148 | 0.5663 | 0.0213 | 757601 | 1.76E-12 |
| rs1834596 | T | C | -0.1325 | -0.0123 | 0.6538 | 0.015 | 0.4124 | 0.0216 | 757601 | 9.37E-10 |
| rs1850507 | T | G | 0.168 | 0.0103 | 0.1966 | 0.0185 | 0.5767 | 0.026 | 757601 | 1.10E-10 |
| rs1866628 | T | C | 0.1201 | -0.014 | 0.5232 | 0.0143 | 0.3309 | 0.0205 | 757601 | 4.82E-09 |
| rs1918973 | A | G | 0.1253 | 0.0208 | 0.5416 | 0.0143 | 0.1464 | 0.0205 | 757601 | 9.91E-10 |
| rs1965942 | A | G | 0.1276 | 0.0199 | 0.4614 | 0.0158 | 0.2089 | 0.0217 | 757601 | 3.78E-09 |
| rs1997571 | A | G | -0.1448 | -0.0046 | 0.409 | 0.0144 | 0.7503 | 0.0208 | 757601 | 3.46E-12 |
| rs200528 | A | G | -0.2295 | 0.0239 | 0.8069 | 0.0178 | 0.181 | 0.0258 | 757601 | 6.38E-19 |
| rs2015637 | T | C | 0.5012 | 8.00E-04 | 0.0996 | 0.0235 | 0.9726 | 0.0345 | 757601 | 8.89E-48 |
| rs2055120 | A | G | -0.5578 | -0.0842 | 0.0223 | 0.0536 | 0.1159 | 0.0722 | 757601 | 1.11E-14 |
| rs2102397 | A | C | 0.1616 | -0.0427 | 0.4936 | 0.0154 | 0.005625 | 0.021 | 757601 | 1.58E-14 |
| rs2107595 | A | G | 0.4435 | 4.00E-04 | 0.8414 | 0.0194 | 0.9843 | 0.0282 | 757601 | 8.24E-56 |
| rs2109019 | A | C | -0.2464 | -0.0118 | 0.7882 | 0.018 | 0.514 | 0.0256 | 757601 | 5.20E-22 |
| rs2143618 | A | G | -0.2211 | 0.0021 | 0.1638 | 0.0195 | 0.9142 | 0.0277 | 757601 | 1.41E-15 |
| rs2148306 | A | C | -0.1802 | 0.0208 | 0.4227 | 0.0144 | 0.1471 | 0.0207 | 757601 | 2.78E-18 |
| rs2175337 | A | C | 0.1656 | -0.0167 | 0.3892 | 0.0147 | 0.2555 | 0.021 | 757601 | 3.52E-15 |
| rs2206815 | A | C | -0.3609 | 5.00E-04 | 0.5022 | 0.0144 | 0.972 | 0.0207 | 757601 | 4.27E-68 |
| rs2215590 | T | C | 0.1732 | -2.00E-04 | 0.7451 | 0.0161 | 0.991 | 0.0235 | 757601 | 1.67E-13 |
| rs222837 | T | C | 0.1265 | -0.0071 | 0.4886 | 0.0144 | 0.6208 | 0.0209 | 757601 | 1.34E-09 |
| rs2242652 | A | G | 0.1577 | -0.0261 | 0.8049 | 0.0235 | 0.2668 | 0.0281 | 757601 | 1.93E-08 |
| rs2255055 | T | C | -0.1259 | 0.0112 | 0.6184 | 0.015 | 0.4551 | 0.0211 | 757601 | 2.32E-09 |
| rs2288277 | T | C | -0.2645 | 0.0384 | 0.9096 | 0.0254 | 0.1298 | 0.036 | 757601 | 2.16E-13 |
| rs2289125 | A | C | -0.3847 | 0.0053 | 0.7798 | 0.018 | 0.7678 | 0.0255 | 757601 | 1.82E-51 |
| rs2328473 | A | G | -0.126 | 0.0035 | 0.5983 | 0.0146 | 0.8108 | 0.0209 | 757601 | 1.71E-09 |
| rs2344402 | T | C | 0.1496 | 0.0027 | 0.4038 | 0.015 | 0.8552 | 0.0214 | 757601 | 2.62E-12 |
| rs2354862 | A | C | 0.1272 | 0.0143 | 0.3597 | 0.0148 | 0.3351 | 0.0215 | 757601 | 3.11E-09 |
| rs2358891 | A | G | 0.1593 | 0.0092 | 0.7545 | 0.0168 | 0.5855 | 0.0241 | 757601 | 4.08E-11 |
| rs2395655 | A | G | 0.1566 | -0.0082 | 0.3882 | 0.0149 | 0.5833 | 0.0211 | 757601 | 1.08E-13 |
| rs2493134 | T | C | -0.1344 | 0.0312 | 0.4068 | 0.0144 | 0.03046 | 0.0209 | 757601 | 1.35E-10 |
| rs2493296 | T | C | 0.1894 | -0.0254 | 0.8576 | 0.0206 | 0.2172 | 0.03 | 757601 | 2.64E-10 |
| rs2498323 | A | G | 0.2957 | -0.0493 | 0.9018 | 0.0239 | 0.03945 | 0.035 | 757601 | 3.07E-17 |
| rs251252 | T | C | 0.1249 | -0.0133 | 0.6694 | 0.0156 | 0.3939 | 0.022 | 757601 | 1.35E-08 |
| rs2540951 | A | G | 0.2243 | 0.0178 | 0.3787 | 0.0147 | 0.2242 | 0.021 | 757601 | 1.26E-26 |
| rs256824 | T | C | -0.1408 | -0.0231 | 0.7293 | 0.0162 | 0.1537 | 0.0232 | 757601 | 1.36E-09 |
| rs2610990 | A | G | -0.1586 | -0.0231 | 0.7364 | 0.0164 | 0.1587 | 0.0233 | 757601 | 1.06E-11 |
| rs263017 | A | G | 0.1356 | 0.0279 | 0.5047 | 0.0143 | 0.05034 | 0.0204 | 757601 | 3.23E-11 |
| rs263532 | T | C | 0.1186 | 6.00E-04 | 0.4244 | 0.0146 | 0.9657 | 0.0208 | 757601 | 1.25E-08 |
| rs2820443 | T | C | 0.1857 | -0.0334 | 0.2911 | 0.0159 | 0.03511 | 0.0224 | 757601 | 1.30E-16 |
| rs2834440 | A | G | 0.1174 | 0.0206 | 0.3796 | 0.0146 | 0.1579 | 0.021 | 757601 | 2.27E-08 |
| rs28499085 | A | G | 0.1569 | -0.0278 | 0.2746 | 0.0162 | 0.08625 | 0.023 | 757601 | 9.35E-12 |
| rs28572357 | A | C | -0.1504 | 0.0263 | 0.3971 | 0.0148 | 0.07574 | 0.0209 | 757601 | 6.83E-13 |
| rs28651151 | T | G | 0.1448 | -0.0024 | 0.2752 | 0.0161 | 0.8799 | 0.0231 | 757601 | 3.59E-10 |
| rs2953930 | T | C | 0.1712 | 0.0245 | 0.8676 | 0.0216 | 0.2571 | 0.0304 | 757601 | 1.76E-08 |
| rs2969036 | T | G | 0.1308 | 0.0073 | 0.693 | 0.0165 | 0.6593 | 0.023 | 757601 | 1.36E-08 |
| rs2978456 | T | C | -0.1781 | 0.0341 | 0.4487 | 0.0148 | 0.02157 | 0.0212 | 757601 | 5.14E-17 |
| rs2983896 | A | G | 0.2127 | -0.022 | 0.7815 | 0.0172 | 0.1996 | 0.0249 | 757601 | 1.26E-17 |
| rs3006576 | T | C | 0.1923 | -0.0187 | 0.296 | 0.0155 | 0.227 | 0.0224 | 757601 | 9.05E-18 |
| rs30232 | A | G | -0.1234 | -0.0237 | 0.4175 | 0.0148 | 0.1092 | 0.0209 | 757601 | 3.37E-09 |
| rs307359 | A | G | -0.3344 | -0.0529 | 0.9312 | 0.0355 | 0.137 | 0.0442 | 757601 | 3.92E-14 |
| rs3098186 | T | C | -0.1735 | -0.045 | 0.4844 | 0.0146 | 0.001971 | 0.0207 | 757601 | 4.40E-17 |
| rs3134950 | A | C | 0.2928 | -0.0444 | 0.3758 | 0.0153 | 0.003702 | 0.0222 | 757601 | 8.16E-40 |
| rs324075 | A | G | 0.2009 | 0.041 | 0.1869 | 0.0204 | 0.04443 | 0.0276 | 757601 | 3.52E-13 |
| rs34587622 | T | C | -0.2084 | -0.0142 | 0.8903 | 0.027 | 0.5978 | 0.035 | 757601 | 2.49E-09 |
| rs34587684 | T | C | 0.1448 | 0.0087 | 0.7958 | 0.0179 | 0.6278 | 0.0254 | 757601 | 1.15E-08 |
| rs35429 | A | G | 0.1777 | 0.0099 | 0.3869 | 0.015 | 0.5111 | 0.0212 | 757601 | 4.94E-17 |
| rs35680304 | T | C | 0.1848 | 0.0059 | 0.407 | 0.0148 | 0.6903 | 0.021 | 757601 | 1.60E-18 |
| rs36047283 | A | G | 0.3743 | 0.0154 | 0.1235 | 0.0239 | 0.5191 | 0.0334 | 757601 | 3.42E-29 |
| rs365990 | A | G | 0.3079 | 0.0058 | 0.3663 | 0.015 | 0.6958 | 0.0213 | 757601 | 1.75E-47 |
| rs37060 | A | G | 0.1489 | -0.0047 | 0.7535 | 0.0165 | 0.7773 | 0.0237 | 757601 | 3.12E-10 |
| rs3742182 | T | C | -0.1863 | 0.008 | 0.1899 | 0.0186 | 0.6669 | 0.0261 | 757601 | 9.00E-13 |
| rs3753802 | T | C | 0.1161 | -0.0062 | 0.3972 | 0.0146 | 0.6721 | 0.0209 | 757601 | 2.71E-08 |
| rs3760994 | A | G | -0.144 | -0.0031 | 0.5084 | 0.0165 | 0.8532 | 0.0218 | 757601 | 4.27E-11 |
| rs3780190 | A | G | -0.1406 | -0.0096 | 0.5365 | 0.0154 | 0.5344 | 0.0208 | 757601 | 1.35E-11 |
| rs3819532 | T | C | -0.1337 | 0.0014 | 0.6088 | 0.0146 | 0.9234 | 0.0209 | 757601 | 1.45E-10 |
| rs385437 | A | G | 0.1626 | 0.007 | 0.1397 | 0.0204 | 0.7326 | 0.0297 | 757601 | 4.51E-08 |
| rs3915425 | T | C | 0.1913 | 0.005 | 0.3182 | 0.0156 | 0.7495 | 0.022 | 757601 | 4.00E-18 |
| rs4075289 | T | G | 0.1539 | 0.0107 | 0.293 | 0.0166 | 0.518 | 0.0233 | 757601 | 4.12E-11 |
| rs4076789 | A | G | -0.1281 | -0.0262 | 0.7341 | 0.0163 | 0.1067 | 0.0231 | 757601 | 2.93E-08 |
| rs42377 | A | G | -0.3175 | -0.0534 | 0.6956 | 0.0154 | 0.0005432 | 0.0225 | 757601 | 2.42E-45 |
| rs4245599 | A | G | -0.1548 | 0.0285 | 0.5421 | 0.0143 | 0.04621 | 0.0207 | 757601 | 7.70E-14 |
| rs4304924 | A | G | -0.1198 | 0.0276 | 0.4323 | 0.0146 | 0.0592 | 0.0208 | 757601 | 8.67E-09 |
| rs4347920 | A | C | -0.1263 | -0.0222 | 0.5966 | 0.0151 | 0.1418 | 0.0211 | 757601 | 2.23E-09 |
| rs4440615 | A | G | -0.2492 | 0.0204 | 0.368 | 0.0149 | 0.1724 | 0.0212 | 757601 | 8.22E-32 |
| rs4441458 | T | C | -0.1289 | 0.0127 | 0.7171 | 0.0158 | 0.4238 | 0.0227 | 757601 | 1.42E-08 |
| rs4491476 | A | G | -0.1678 | -0.0024 | 0.5903 | 0.0147 | 0.8708 | 0.0211 | 757601 | 1.89E-15 |
| rs4551303 | T | C | -0.1873 | -0.0367 | 0.6835 | 0.0158 | 0.01993 | 0.0221 | 757601 | 2.06E-17 |
| rs4553000 | T | C | -0.1464 | -0.0182 | 0.4861 | 0.0142 | 0.2006 | 0.0204 | 757601 | 7.47E-13 |
| rs4559481 | A | G | -0.1174 | -0.0239 | 0.5181 | 0.015 | 0.1102 | 0.021 | 757601 | 2.30E-08 |
| rs4594944 | A | G | -0.1256 | 0.0067 | 0.3159 | 0.0154 | 0.6631 | 0.0221 | 757601 | 1.38E-08 |
| rs4664080 | A | G | -0.135 | 0.0077 | 0.6022 | 0.0146 | 0.5985 | 0.0209 | 757601 | 1.03E-10 |
| rs4672081 | T | C | -0.142 | -0.0049 | 0.435 | 0.0144 | 0.7323 | 0.0206 | 757601 | 4.98E-12 |
| rs4674114 | A | G | -0.2116 | -0.0083 | 0.799 | 0.0177 | 0.6403 | 0.0256 | 757601 | 1.28E-16 |
| rs4691670 | T | C | -0.2359 | 0.0345 | 0.4671 | 0.0142 | 0.01553 | 0.0205 | 757601 | 1.11E-30 |
| rs4796514 | T | C | -0.2313 | -0.0155 | 0.3914 | 0.0147 | 0.2902 | 0.021 | 757601 | 4.11E-28 |
| rs4819852 | A | G | 0.2486 | -0.0276 | 0.7129 | 0.0159 | 0.08176 | 0.0228 | 757601 | 8.73E-28 |
| rs4842266 | A | G | -0.1675 | -0.015 | 0.3138 | 0.0153 | 0.327 | 0.0222 | 757601 | 4.95E-14 |
| rs486098 | T | C | 0.1536 | -0.0091 | 0.7309 | 0.0164 | 0.5785 | 0.0232 | 757601 | 3.68E-11 |
| rs4873492 | T | C | 0.2202 | 0.0199 | 0.8277 | 0.0185 | 0.2812 | 0.0273 | 757601 | 8.05E-16 |
| rs4922591 | T | C | -0.1513 | -0.0039 | 0.6133 | 0.0149 | 0.7951 | 0.0214 | 757601 | 1.39E-12 |
| rs4946265 | A | G | 0.1546 | -0.0016 | 0.488 | 0.0143 | 0.911 | 0.0205 | 757601 | 5.38E-14 |
| rs4950838 | T | C | 0.212 | -0.0055 | 0.0985 | 0.0234 | 0.815 | 0.0346 | 757601 | 8.60E-10 |
| rs4952955 | T | C | -0.1424 | 0.0216 | 0.7983 | 0.0181 | 0.2329 | 0.0258 | 757601 | 3.48E-08 |
| rs4968716 | T | C | 0.1364 | 0.0037 | 0.4798 | 0.0153 | 0.8081 | 0.0211 | 757601 | 9.84E-11 |
| rs4977492 | T | C | -0.1252 | -0.0187 | 0.3379 | 0.0159 | 0.24 | 0.0216 | 757601 | 6.70E-09 |
| rs4980515 | T | C | 0.1628 | -0.0405 | 0.5012 | 0.0143 | 0.004616 | 0.0205 | 757601 | 2.29E-15 |
| rs558248 | A | G | 0.1915 | -0.0176 | 0.378 | 0.0148 | 0.2331 | 0.0212 | 757601 | 1.61E-19 |
| rs55947600 | A | G | -0.1895 | 0.0205 | 0.5377 | 0.0143 | 0.1525 | 0.0206 | 757601 | 4.10E-20 |
| rs55962736 | T | G | -0.1562 | -0.002 | 0.4906 | 0.0143 | 0.8901 | 0.0205 | 757601 | 2.49E-14 |
| rs560887 | T | C | -0.1904 | -0.0256 | 0.7011 | 0.0157 | 0.1031 | 0.0223 | 757601 | 1.57E-17 |
| rs56090516 | T | C | -0.1304 | -0.0108 | 0.3377 | 0.015 | 0.4721 | 0.0216 | 757601 | 1.56E-09 |
| rs56255660 | A | C | 0.2339 | 0.0255 | 0.7422 | 0.0167 | 0.1275 | 0.0236 | 757601 | 4.23E-23 |
| rs56287081 | A | G | 0.2018 | -0.0104 | 0.811 | 0.0183 | 0.5682 | 0.0262 | 757601 | 1.40E-14 |
| rs56288724 | A | G | -0.2377 | -0.0161 | 0.4174 | 0.0149 | 0.278 | 0.0211 | 757601 | 1.99E-29 |
| rs57139556 | A | G | 0.3087 | -0.0082 | 0.0714 | 0.0285 | 0.7728 | 0.0399 | 757601 | 1.02E-14 |
| rs573455 | A | G | 0.2515 | 0.0108 | 0.5386 | 0.0145 | 0.4578 | 0.0206 | 757601 | 2.37E-34 |
| rs5753103 | A | G | 0.1377 | -0.0028 | 0.549 | 0.0143 | 0.8443 | 0.0206 | 757601 | 2.62E-11 |
| rs57946343 | T | C | 0.2405 | 0.0043 | 0.1475 | 0.0199 | 0.8308 | 0.0289 | 757601 | 8.47E-17 |
| rs58232567 | A | G | -0.32 | -0.0122 | 0.9561 | 0.0337 | 0.7174 | 0.0523 | 757601 | 9.62E-10 |
| rs58278271 | A | G | -0.2276 | 0.0176 | 0.9154 | 0.0256 | 0.4911 | 0.0368 | 757601 | 6.39E-10 |
| rs6006987 | A | C | 0.1312 | -0.0097 | 0.7231 | 0.0157 | 0.5373 | 0.0229 | 757601 | 1.08E-08 |
| rs60255247 | A | C | 0.2491 | 0.0136 | 0.1125 | 0.0239 | 0.5705 | 0.033 | 757601 | 4.53E-14 |
| rs6031431 | A | G | -0.1575 | -0.0124 | 0.4625 | 0.0146 | 0.3925 | 0.0207 | 757601 | 2.72E-14 |
| rs604723 | T | C | -0.2689 | -0.001 | 0.7245 | 0.0158 | 0.9477 | 0.023 | 757601 | 1.46E-31 |
| rs60672471 | T | C | 0.1919 | 0.0154 | 0.1071 | 0.0232 | 0.5076 | 0.0333 | 757601 | 7.96E-09 |
| rs6078000 | A | G | -0.1946 | 0.0196 | 0.2844 | 0.0157 | 0.2143 | 0.0226 | 757601 | 8.02E-18 |
| rs60991988 | T | G | 0.5294 | 0.0083 | 0.1069 | 0.0228 | 0.7157 | 0.0337 | 757601 | 1.44E-55 |
| rs62055086 | T | C | 0.1854 | -0.0092 | 0.7078 | 0.0187 | 0.6222 | 0.0243 | 757601 | 2.55E-14 |
| rs62062581 | T | G | 0.1903 | -0.0298 | 0.1684 | 0.0205 | 0.1458 | 0.0282 | 757601 | 1.56E-11 |
| rs62111832 | A | G | 0.2373 | -0.0511 | 0.9336 | 0.0292 | 0.08001 | 0.0414 | 757601 | 9.78E-09 |
| rs62270945 | T | C | 0.5276 | 0.014 | 0.9711 | 0.046 | 0.7609 | 0.0651 | 757601 | 5.17E-16 |
| rs62278541 | A | G | 0.1677 | 0.0143 | 0.3526 | 0.0149 | 0.3385 | 0.0214 | 757601 | 4.84E-15 |
| rs62449490 | T | G | 0.1137 | -0.0028 | 0.4588 | 0.0144 | 0.8489 | 0.0207 | 757601 | 3.72E-08 |
| rs629445 | A | G | -0.1319 | 0.0102 | 0.6106 | 0.0149 | 0.4932 | 0.021 | 757601 | 3.53E-10 |
| rs631441 | T | G | -0.1543 | -0.0297 | 0.3053 | 0.0156 | 0.0566 | 0.0222 | 757601 | 3.56E-12 |
| rs6415872 | A | G | 0.1215 | 0.0035 | 0.5087 | 0.0144 | 0.8094 | 0.0206 | 757601 | 3.70E-09 |
| rs6461992 | A | G | -0.4361 | -0.0052 | 0.9261 | 0.0282 | 0.8527 | 0.04 | 757601 | 1.03E-27 |
| rs6504252 | T | C | -0.2951 | -0.0241 | 0.9481 | 0.0368 | 0.5131 | 0.0504 | 757601 | 4.70E-09 |
| rs6544652 | T | C | -0.1441 | 0.0107 | 0.7642 | 0.0167 | 0.5214 | 0.024 | 757601 | 1.95E-09 |
| rs6598886 | T | C | 0.218 | 0.0152 | 0.088 | 0.0245 | 0.5363 | 0.0367 | 757601 | 2.97E-09 |
| rs6601523 | A | G | -0.205 | 0.0064 | 0.4099 | 0.0147 | 0.661 | 0.0208 | 757601 | 7.91E-23 |
| rs663640 | T | C | -0.1547 | -0.0362 | 0.783 | 0.0176 | 0.03949 | 0.025 | 757601 | 5.94E-10 |
| rs6731373 | A | G | 0.1336 | 6.00E-04 | 0.6503 | 0.0162 | 0.9704 | 0.0221 | 757601 | 1.43E-09 |
| rs6747874 | A | G | 0.1704 | 0.0209 | 0.7775 | 0.0173 | 0.2271 | 0.0247 | 757601 | 5.02E-12 |
| rs6766170 | A | C | -0.165 | -0.0045 | 0.5067 | 0.0144 | 0.7536 | 0.0207 | 757601 | 1.36E-15 |
| rs67772913 | A | G | 0.2307 | 0.0046 | 0.3041 | 0.016 | 0.7728 | 0.0225 | 757601 | 1.14E-24 |
| rs6788984 | A | G | 0.1882 | -0.0116 | 0.144 | 0.0195 | 0.5509 | 0.0293 | 757601 | 1.31E-10 |
| rs6806529 | A | C | 0.1372 | 0.0102 | 0.5662 | 0.0146 | 0.4882 | 0.0209 | 757601 | 5.81E-11 |
| rs68100343 | T | C | 0.1425 | 0.0067 | 0.7352 | 0.017 | 0.6912 | 0.0235 | 757601 | 1.28E-09 |
| rs6823199 | T | C | 0.1567 | -0.02 | 0.2565 | 0.0163 | 0.2191 | 0.0236 | 757601 | 3.07E-11 |
| rs686722 | T | C | 0.3174 | -0.0222 | 0.6381 | 0.0154 | 0.1495 | 0.022 | 757601 | 4.20E-47 |
| rs6920534 | T | C | 0.2738 | -0.0205 | 0.0973 | 0.0248 | 0.4083 | 0.0357 | 757601 | 1.62E-14 |
| rs6951894 | A | G | -0.1416 | 0.0126 | 0.5757 | 0.0144 | 0.3822 | 0.0208 | 757601 | 8.85E-12 |
| rs696 | T | C | 0.2107 | 0.0215 | 0.6317 | 0.0149 | 0.1485 | 0.0214 | 757601 | 7.48E-23 |
| rs7011889 | A | C | 0.1167 | -0.0171 | 0.4454 | 0.0143 | 0.2308 | 0.0207 | 757601 | 1.64E-08 |
| rs702395 | T | C | 0.1437 | 0.0408 | 0.5634 | 0.0146 | 0.005262 | 0.0207 | 757601 | 4.17E-12 |
| rs704191 | T | C | 0.1628 | -0.0184 | 0.5369 | 0.0145 | 0.2037 | 0.0206 | 757601 | 2.74E-15 |
| rs7058 | T | G | 0.1804 | -0.0148 | 0.537 | 0.0143 | 0.3018 | 0.0206 | 757601 | 1.86E-18 |
| rs7070115 | A | G | -0.2565 | 0.0235 | 0.4304 | 0.0146 | 0.1068 | 0.0208 | 757601 | 4.63E-35 |
| rs7095472 | A | G | 0.1156 | 0.0276 | 0.5308 | 0.0149 | 0.06443 | 0.0211 | 757601 | 4.12E-08 |
| rs7099368 | T | C | 0.1417 | -0.0285 | 0.41 | 0.0145 | 0.0496 | 0.0209 | 757601 | 1.16E-11 |
| rs7107356 | A | G | -0.234 | -0.0668 | 0.5044 | 0.0143 | 2.79E-06 | 0.0205 | 757601 | 3.24E-30 |
| rs7119612 | T | C | -0.246 | 0.0431 | 0.9059 | 0.025 | 0.08398 | 0.0354 | 757601 | 3.64E-12 |
| rs714417 | T | C | -0.2229 | 0.0242 | 0.7001 | 0.0154 | 0.1153 | 0.0224 | 757601 | 2.53E-23 |
| rs71594307 | A | G | 0.2664 | 0.0414 | 0.9513 | 0.037 | 0.2631 | 0.0488 | 757601 | 4.83E-08 |
| rs7178506 | T | C | -0.1229 | 0.0113 | 0.3882 | 0.0156 | 0.4671 | 0.0216 | 757601 | 1.30E-08 |
| rs7214 | T | G | 0.1255 | 0.0424 | 0.4313 | 0.0145 | 0.003437 | 0.0207 | 757601 | 1.32E-09 |
| rs7236548 | A | C | 0.3621 | -0.0046 | 0.8152 | 0.0183 | 0.8013 | 0.0264 | 757601 | 8.48E-43 |
| rs7245814 | A | G | -0.2909 | 0.0209 | 0.9031 | 0.0238 | 0.3796 | 0.0345 | 757601 | 3.75E-17 |
| rs72664332 | A | C | 0.2758 | -0.0103 | 0.0922 | 0.0248 | 0.6778 | 0.0354 | 757601 | 6.81E-15 |
| rs72676189 | A | G | -0.204 | 0.0091 | 0.1405 | 0.0203 | 0.6533 | 0.0294 | 757601 | 3.62E-12 |
| rs72761109 | T | C | 0.1583 | 0.0222 | 0.6971 | 0.0158 | 0.1603 | 0.0223 | 757601 | 1.19E-12 |
| rs72830615 | A | G | 0.1794 | -0.0171 | 0.4017 | 0.0146 | 0.2413 | 0.0211 | 757601 | 1.59E-17 |
| rs72874178 | A | G | -0.3788 | -0.0031 | 0.7655 | 0.0171 | 0.8567 | 0.0242 | 757601 | 4.29E-55 |
| rs72884380 | T | C | -0.1245 | -0.0079 | 0.3793 | 0.0148 | 0.596 | 0.021 | 757601 | 3.11E-09 |
| rs72943207 | A | G | 0.1439 | -0.0133 | 0.7981 | 0.0187 | 0.4759 | 0.0258 | 757601 | 2.33E-08 |
| rs7313556 | A | G | -0.1396 | 0.0093 | 0.652 | 0.0148 | 0.528 | 0.0214 | 757601 | 6.79E-11 |
| rs73158180 | A | C | -0.1693 | 9.00E-04 | 0.2966 | 0.0162 | 0.9562 | 0.023 | 757601 | 1.76E-13 |
| rs7321688 | A | C | 0.1888 | 0.0049 | 0.7672 | 0.0168 | 0.7724 | 0.0242 | 757601 | 6.48E-15 |
| rs7338758 | T | C | 0.1575 | -8.00E-04 | 0.7561 | 0.0168 | 0.9623 | 0.024 | 757601 | 5.49E-11 |
| rs7341594 | A | G | 0.5069 | 0.0364 | 0.7797 | 0.0171 | 0.03363 | 0.0248 | 757601 | 5.56E-93 |
| rs73727606 | A | G | 0.2532 | 0.0161 | 0.9286 | 0.0307 | 0.5995 | 0.0411 | 757601 | 6.99E-10 |
| rs73767089 | T | C | 0.2843 | 0 | 0.1082 | 0.0231 | 0.9999 | 0.0332 | 757601 | 1.08E-17 |
| rs73900405 | A | G | 0.1651 | -0.0096 | 0.2482 | 0.0163 | 0.5568 | 0.0237 | 757601 | 3.34E-12 |
| rs74048200 | A | G | -0.2268 | -0.0116 | 0.0861 | 0.0288 | 0.6873 | 0.039 | 757601 | 6.05E-09 |
| rs7412 | T | C | -0.3769 | -0.4673 | 0.9182 | 0.0305 | 6.40E-53 | 0.0391 | 757601 | 5.73E-22 |
| rs74179970 | A | G | 0.272 | 0.0052 | 0.9188 | 0.0287 | 0.8575 | 0.0387 | 757601 | 2.09E-12 |
| rs74889068 | A | G | 0.2053 | 0.0395 | 0.8547 | 0.0204 | 0.0536 | 0.0298 | 757601 | 5.48E-12 |
| rs7491248 | A | G | 0.1544 | -0.0103 | 0.776 | 0.017 | 0.5429 | 0.0247 | 757601 | 3.94E-10 |
| rs7497304 | T | G | 0.2821 | 0.0044 | 0.6731 | 0.0162 | 0.7845 | 0.0223 | 757601 | 1.39E-36 |
| rs7500448 | A | G | 0.3589 | -0.0147 | 0.2536 | 0.0168 | 0.3831 | 0.0239 | 757601 | 3.62E-51 |
| rs75016974 | T | C | -0.219 | -0.012 | 0.858 | 0.0215 | 0.5751 | 0.0299 | 757601 | 2.50E-13 |
| rs753361 | A | G | 0.1289 | 0.0106 | 0.5789 | 0.0152 | 0.4852 | 0.0215 | 757601 | 2.03E-09 |
| rs75461554 | T | C | -0.1959 | 0.0092 | 0.7993 | 0.0176 | 0.6002 | 0.0256 | 757601 | 1.84E-14 |
| rs75758489 | T | C | -0.1763 | 0.0063 | 0.1777 | 0.0226 | 0.7808 | 0.0291 | 757601 | 1.36E-09 |
| rs7578166 | A | C | 0.1383 | 0.0306 | 0.6139 | 0.0146 | 0.03622 | 0.0209 | 757601 | 4.06E-11 |
| rs75887402 | T | C | 0.5292 | -0.1053 | 0.029 | 0.0455 | 0.02056 | 0.065 | 757601 | 4.05E-16 |
| rs7603849 | A | C | -0.1564 | 0.0116 | 0.522 | 0.0142 | 0.414 | 0.0205 | 757601 | 2.28E-14 |
| rs76183925 | T | C | -0.2019 | 0.0316 | 0.1103 | 0.0234 | 0.1771 | 0.0331 | 757601 | 1.12E-09 |
| rs7630745 | T | C | 0.1636 | -0.0036 | 0.3409 | 0.015 | 0.812 | 0.0215 | 757601 | 2.73E-14 |
| rs7707563 | T | C | 0.1545 | -0.0255 | 0.7555 | 0.0167 | 0.1278 | 0.0238 | 757601 | 8.84E-11 |
| rs77301788 | T | C | -0.1633 | 0.0159 | 0.3094 | 0.0155 | 0.3052 | 0.0221 | 757601 | 1.67E-13 |
| rs7733331 | T | C | -0.3378 | 0.0225 | 0.6008 | 0.0145 | 0.1221 | 0.0209 | 757601 | 6.01E-59 |
| rs7763294 | T | G | -0.1551 | -0.0099 | 0.6838 | 0.0153 | 0.5168 | 0.022 | 757601 | 1.87E-12 |
| rs7774311 | A | G | -0.3547 | 0.0078 | 0.1511 | 0.0204 | 0.7 | 0.0288 | 757601 | 9.11E-35 |
| rs7821832 | T | G | 0.2137 | 0.0135 | 0.2552 | 0.0163 | 0.4076 | 0.0236 | 757601 | 1.54E-19 |
| rs78378222 | T | G | 1.0488 | 0.04 | 0.0139 | 0.0735 | 0.5864 | 0.0945 | 757601 | 1.28E-28 |
| rs7853859 | T | C | 0.1212 | 0.0241 | 0.3671 | 0.0147 | 0.1007 | 0.0212 | 757601 | 1.11E-08 |
| rs7854147 | A | G | 0.2778 | 0.0019 | 0.1227 | 0.0227 | 0.932 | 0.0314 | 757601 | 8.16E-19 |
| rs7857437 | T | C | 0.3696 | 0.0535 | 0.9682 | 0.0392 | 0.1725 | 0.0591 | 757601 | 4.13E-10 |
| rs786923 | T | C | -0.1984 | 0.0031 | 0.3764 | 0.0146 | 0.8332 | 0.021 | 757601 | 3.98E-21 |
| rs78799967 | T | C | -0.4695 | 0.0777 | 0.9735 | 0.0494 | 0.1156 | 0.0689 | 757601 | 9.39E-12 |
| rs78806058 | A | G | -0.1873 | 0.0453 | 0.8644 | 0.0236 | 0.05511 | 0.0312 | 757601 | 1.95E-09 |
| rs79409628 | T | G | -0.3086 | 0.0076 | 0.9154 | 0.0253 | 0.7644 | 0.0368 | 757601 | 5.24E-17 |
| rs7977311 | T | C | -0.199 | -0.0174 | 0.8844 | 0.0219 | 0.4266 | 0.032 | 757601 | 4.88E-10 |
| rs8010344 | A | G | 0.1513 | -0.0099 | 0.1799 | 0.0183 | 0.5882 | 0.0269 | 757601 | 1.81E-08 |
| rs8017780 | A | C | 0.162 | -0.0209 | 0.7861 | 0.0173 | 0.2284 | 0.0251 | 757601 | 1.14E-10 |
| rs8052826 | A | G | 0.1683 | 0.0047 | 0.7887 | 0.018 | 0.7951 | 0.0254 | 757601 | 3.40E-11 |
| rs8102624 | A | G | 0.5573 | -0.0335 | 0.9228 | 0.0273 | 0.221 | 0.0393 | 757601 | 1.11E-45 |
| rs8118848 | A | G | -0.1881 | 0.0348 | 0.7597 | 0.0175 | 0.04713 | 0.0249 | 757601 | 4.35E-14 |
| rs848445 | T | C | -0.1309 | 0.0193 | 0.7146 | 0.0162 | 0.2354 | 0.023 | 757601 | 1.24E-08 |
| rs853170 | T | C | 0.152 | 4.00E-04 | 0.2628 | 0.016 | 0.9799 | 0.0233 | 757601 | 7.13E-11 |
| rs916904 | A | G | 0.1199 | -0.0118 | 0.6293 | 0.0155 | 0.4455 | 0.0217 | 757601 | 3.33E-08 |
| rs9291825 | A | G | -0.1274 | 0.0128 | 0.5162 | 0.0142 | 0.3693 | 0.0206 | 757601 | 5.91E-10 |
| rs929581 | T | C | 0.1318 | -0.0026 | 0.3544 | 0.0148 | 0.86 | 0.0213 | 757601 | 5.73E-10 |
| rs9302885 | A | G | 0.1208 | 0.0102 | 0.5545 | 0.0144 | 0.4786 | 0.0206 | 757601 | 4.12E-09 |
| rs9310608 | T | C | -0.1673 | -7.00E-04 | 0.8565 | 0.0205 | 0.9741 | 0.0295 | 757601 | 1.45E-08 |
| rs9337951 | A | G | 0.2583 | -0.0277 | 0.6585 | 0.0166 | 0.09473 | 0.0227 | 757601 | 4.24E-30 |
| rs9340985 | T | C | -0.4763 | 0.0077 | 0.1095 | 0.023 | 0.7376 | 0.033 | 757601 | 4.20E-47 |
| rs9349379 | A | G | 0.2677 | -0.0067 | 0.4068 | 0.0148 | 0.6496 | 0.0212 | 757601 | 1.32E-36 |
| rs9356816 | A | G | -0.1292 | -0.0114 | 0.2498 | 0.0165 | 0.4872 | 0.0236 | 757601 | 4.35E-08 |
| rs9486916 | T | C | 0.1842 | -0.0254 | 0.8025 | 0.0181 | 0.1595 | 0.0261 | 757601 | 1.84E-12 |
| rs949827 | T | C | 0.1523 | 0.0078 | 0.3253 | 0.0152 | 0.6082 | 0.0218 | 757601 | 2.63E-12 |
| rs9532798 | T | C | 0.1395 | -0.0044 | 0.2416 | 0.0163 | 0.7871 | 0.0241 | 757601 | 7.62E-09 |
| rs9549328 | T | C | 0.2164 | -0.0049 | 0.7696 | 0.0175 | 0.7812 | 0.0247 | 757601 | 1.77E-18 |
| rs9608690 | A | G | -0.2489 | 0.0492 | 0.9319 | 0.0282 | 0.08054 | 0.0409 | 757601 | 1.15E-09 |
| rs9661802 | A | C | 0.1377 | -0.0339 | 0.3345 | 0.0155 | 0.02854 | 0.0218 | 757601 | 2.66E-10 |
| rs9747001 | A | G | -0.209 | 0.0163 | 0.7917 | 0.0175 | 0.3518 | 0.0251 | 757601 | 8.84E-17 |
| rs977184 | T | C | -0.1947 | -0.0059 | 0.3741 | 0.0149 | 0.6922 | 0.0213 | 757601 | 6.86E-20 |
| rs9835724 | A | G | 0.1626 | 0.015 | 0.3148 | 0.0154 | 0.3315 | 0.0221 | 757601 | 1.82E-13 |
| rs9835962 | A | C | -0.2514 | 0.0113 | 0.9251 | 0.0258 | 0.6621 | 0.0392 | 757601 | 1.40E-10 |
| rs9839213 | T | C | -0.5316 | -0.0112 | 0.8299 | 0.0189 | 0.5552 | 0.0279 | 757601 | 4.03E-81 |
| rs9860290 | A | G | -0.1737 | -0.0266 | 0.7908 | 0.0178 | 0.136 | 0.0252 | 757601 | 5.22E-12 |
| rs9860302 | A | G | -0.1365 | -0.0183 | 0.2809 | 0.0157 | 0.2444 | 0.0227 | 757601 | 1.89E-09 |
| rs9937815 | A | G | -0.1386 | -0.0021 | 0.3266 | 0.0152 | 0.8909 | 0.022 | 757601 | 2.87E-10 |
| rs999958 | A | C | -0.2208 | 0.0014 | 0.5172 | 0.0142 | 0.9201 | 0.0205 | 757601 | 5.69E-27 |

**Additional file 7 Leave-one-out plots**

**AHMs**

**
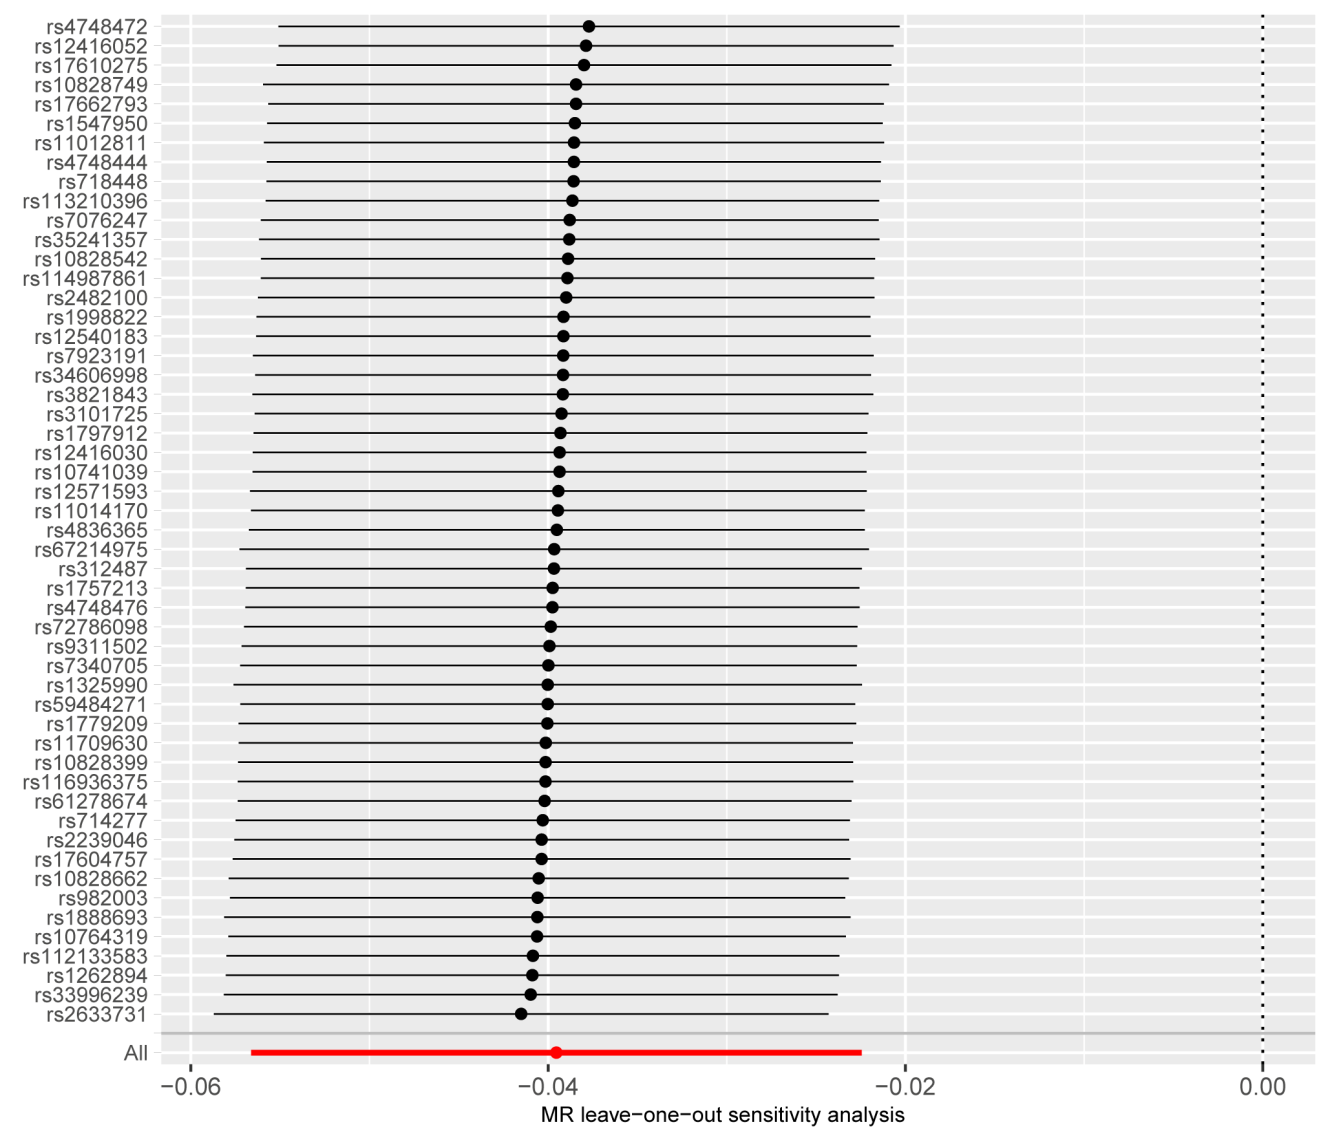
**

**CCB**

**
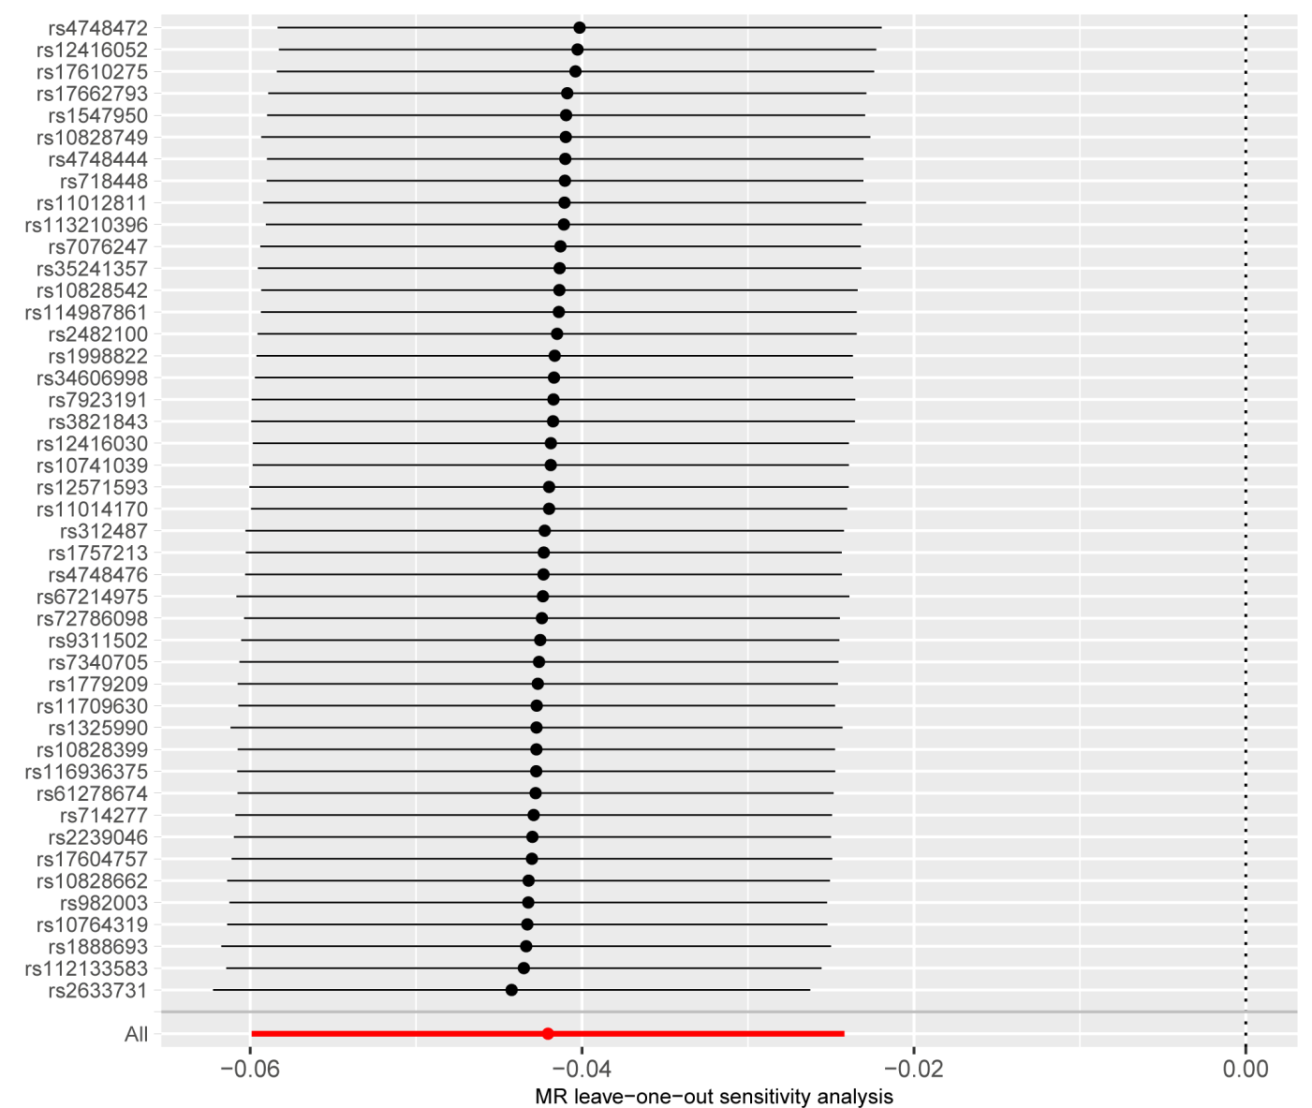
**

**Thiazides**

**
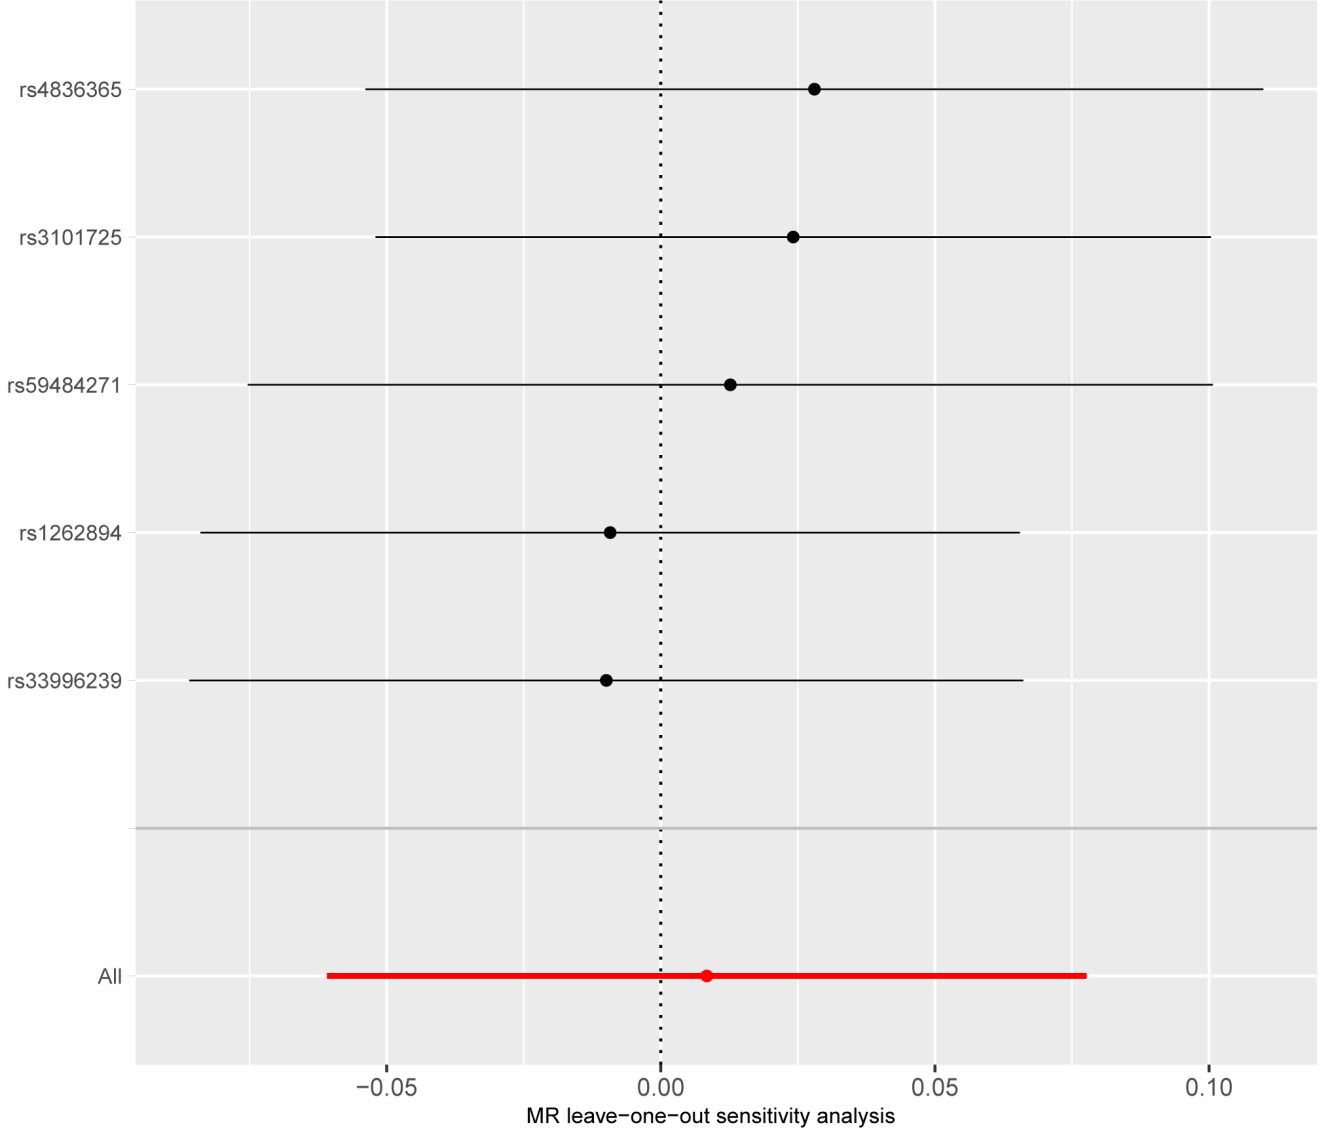
**
